# Supplementary material for: Mechanofluorochromic Properties of 1,4-Diphenylanthracene Derivatives with Hypsochromic Shift
Source: MDPI journal article supplement (doi:10.3390/molecules29020407), 2024-01-14

## **Mechanofluorochromic properties of 1,4-diphenylanthracene derivatives with hypsochromic shift**

*Fumihiko Kannen<sup>1</sup>, Tadatoshi Adachi<sup>1</sup>, Manato Nishimura<sup>1</sup>, Kenji Yoza<sup>2</sup>*

*and Takahiro Kusakawa<sup>\*1</sup>*

*<sup>1</sup>Faculty of Molecular Chemistry and Engineering,  
Graduate School of Science and Technology, Kyoto Institute of Technology,  
Matsugasaki, Sakyo-ku Kyoto 606-8585, Japan*

*<sup>2</sup>Bruker Japan K.K., 3-9 Moriya-cho, Kanagawa-ku, Yokohama 221-0022, Japan*

### **Outline**

|      |                                                                                                                             |     |
|------|-----------------------------------------------------------------------------------------------------------------------------|-----|
| 1.   | Supplementary figures and tables                                                                                            | p3  |
| 1.1  | Fluorescence spectra of the pristine, ground, and stored samples of 1,4-diphenylanthracene derivatives                      | p3  |
| 1.2  | Fluorescence images of the pristine, ground, stored, heated and fumed sample of 1,4-diphenylanthracene derivatives          | p5  |
| 1.3  | Fluorescence spectra of the pristine, ground, ground-fumed, and ground-heated samples of 1,4-diphenylanthracene derivatives | p11 |
| 1.4  | Vapochromic properties of 1,4-diphenylanthracene derivatives                                                                | p13 |
| 1.5  | Thermochromic properties of 1,4-diphenylanthracene derivatives                                                              | p14 |
| 1.6  | IR spectra of the CN-substituted 1,4-diphenylanthracene derivatives                                                         | p16 |
| 1.7  | DSC profiles of 1,4-diphenylanthracene derivatives                                                                          | p17 |
| 1.8  | UV-vis absorption spectra of the pristine and ground samples                                                                | p18 |
| 1.9  | UV-vis absorption spectra of 1,4-diphenylanthracene derivatives in CHCl <sub>3</sub> solution                               | p20 |
| 1.10 | Fluorescence spectra of 1,4-diphenylanthracene derivatives in CHCl <sub>3</sub> solution                                    | p22 |
| 1.11 | Fluorescence spectra of 1,4-diphenylanthracene derivatives in PMMA film                                                     | p25 |
| 1.12 | Fluorescence lifetime decay profiles of pristine, ground, ground-heated and ground-fumed samples                            | p27 |

|      |                                                                                                          |     |
|------|----------------------------------------------------------------------------------------------------------|-----|
| 1.13 | Fluorescence lifetime decay profiles of 1,4-diphenylanthracene derivatives in CHCl <sub>3</sub> solution | p30 |
| 1.14 | Fluorescence lifetime decay profiles of 1,4-diphenylanthracene derivatives in PMMA film                  | p31 |
| 1.15 | Photophysical properties of 1,4-diphenylanthracene derivatives                                           | p32 |
| 2.   | X-ray analysis of 1,4-diphenylanthracene derivatives                                                     | p33 |
| 2.1  | Single crystal X-ray analysis of 1,4-diphenylanthracene derivatives                                      | p33 |
| 2.2  | Powder X-ray diffraction (PXRD) patterns                                                                 | p41 |
| 3.   | DFT calculation of the obtained crystal structures                                                       | p43 |
| 4.   | UV irradiation experiments for 1,4-diphenylanthracene derivatives                                        | p46 |
| 5.   | NMR spectra of new compounds                                                                             | p47 |

## 1. Supplementary figures and tables

### 1.1 Fluorescence spectra of the pristine, ground and stored (5 min. after grinding) samples of 1,4-diphenylanthracene derivatives

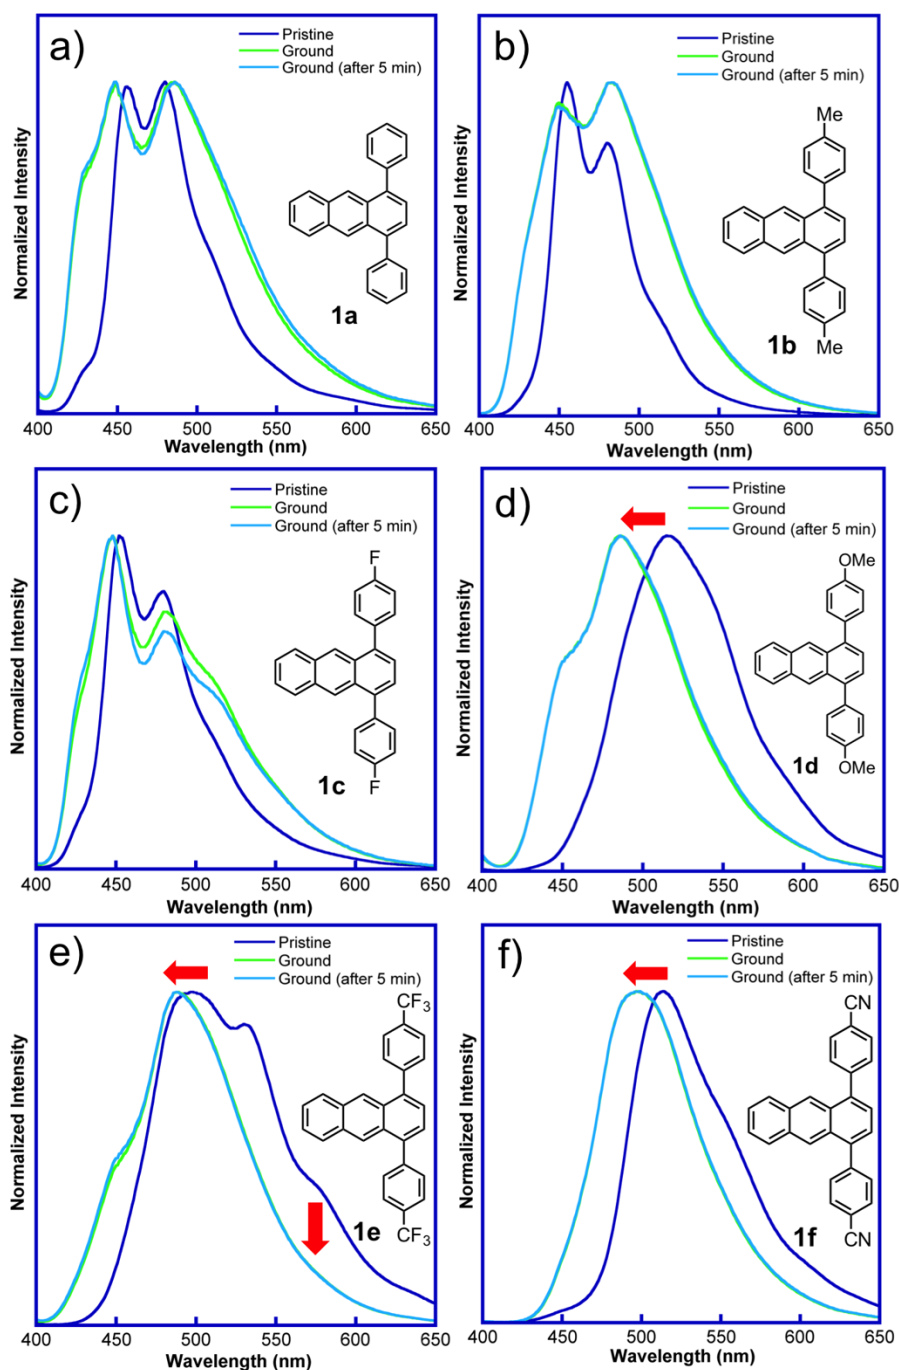

**Figure S1.** Normalized fluorescence spectra of pristine, ground and stored (5 min. after grinding) samples ( $\lambda_{\text{ex}} = 365$  nm), a) **1a** (R=H), b) **1b** (R=Me), c) **1c** (R=F), d) **1d** (R=OMe), e) **1e** (R=CF<sub>3</sub>), f) **1f** (R=CN).

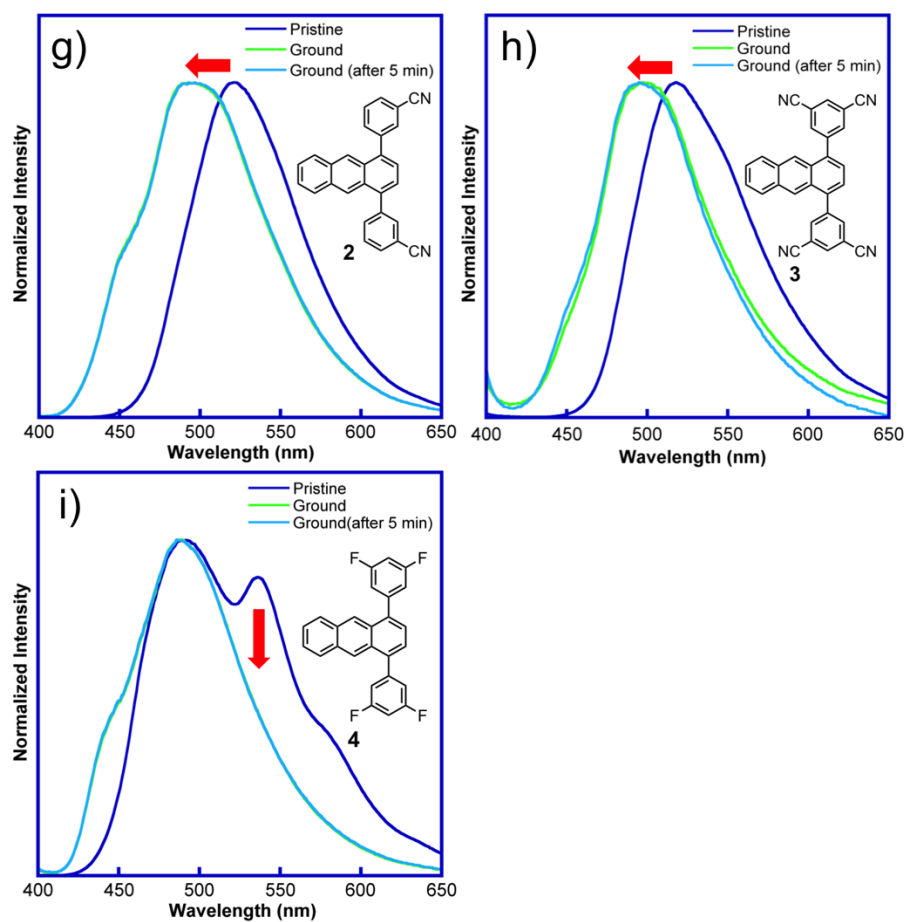

**Figure S1 (contd.).** Normalized fluorescence spectra of pristine, ground and stored (5 min. after grinding) samples ( $\lambda_{\text{ex}} = 365$  nm), g) **2** (3-CN), h) **3** (3,5-CN<sub>2</sub>, R'=CN), i) **4** (3,5-F<sub>2</sub>, R'=F).



## 1.2 Fluorescence images of the pristine, ground, stored (5 min after grinding) samples, heated and fumed samples of 1,4-diphenylanthracene derivatives

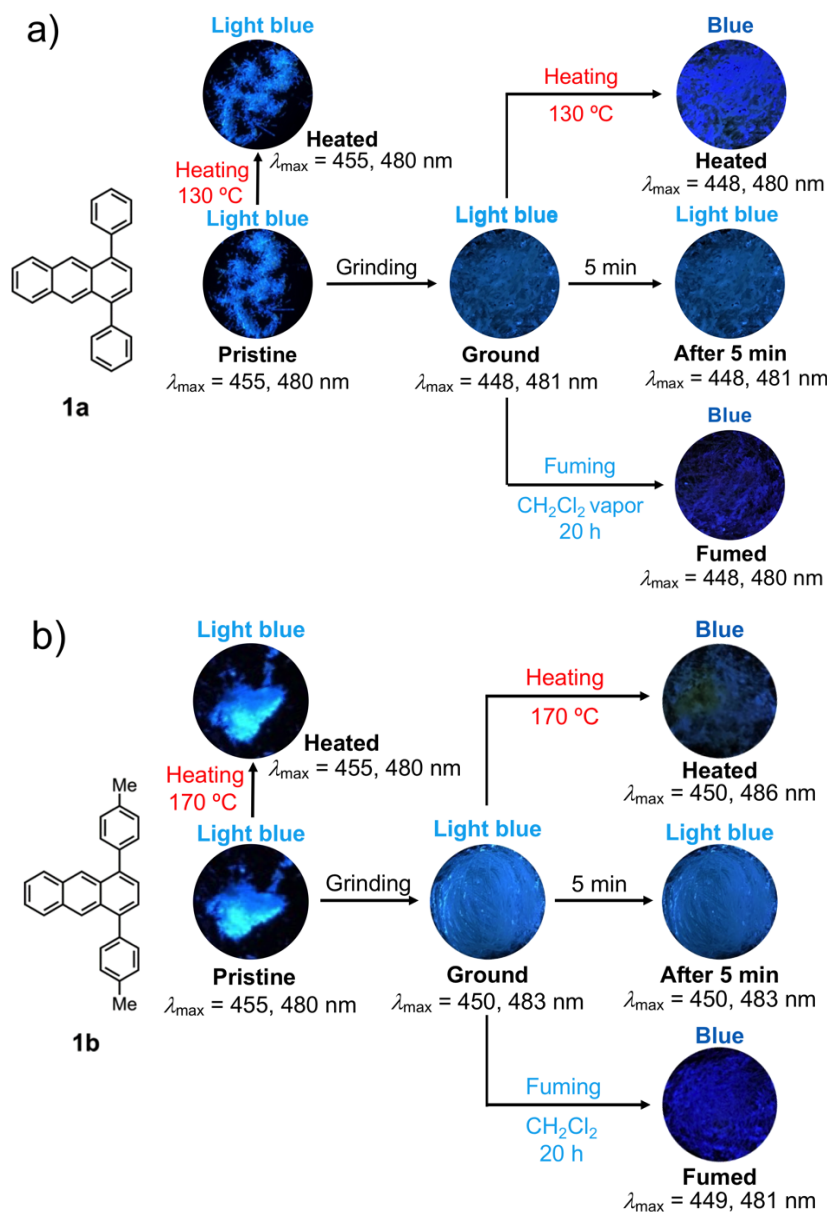

**Figure S2.** Fluorescence images of 1,4-diphenylanthracene derivatives pristine, ground, stored (5 min after grinding), heated and fumed samples during a 365 nm UV irradiation, a) **1a** (R=H), b) **1b** (R=Me).

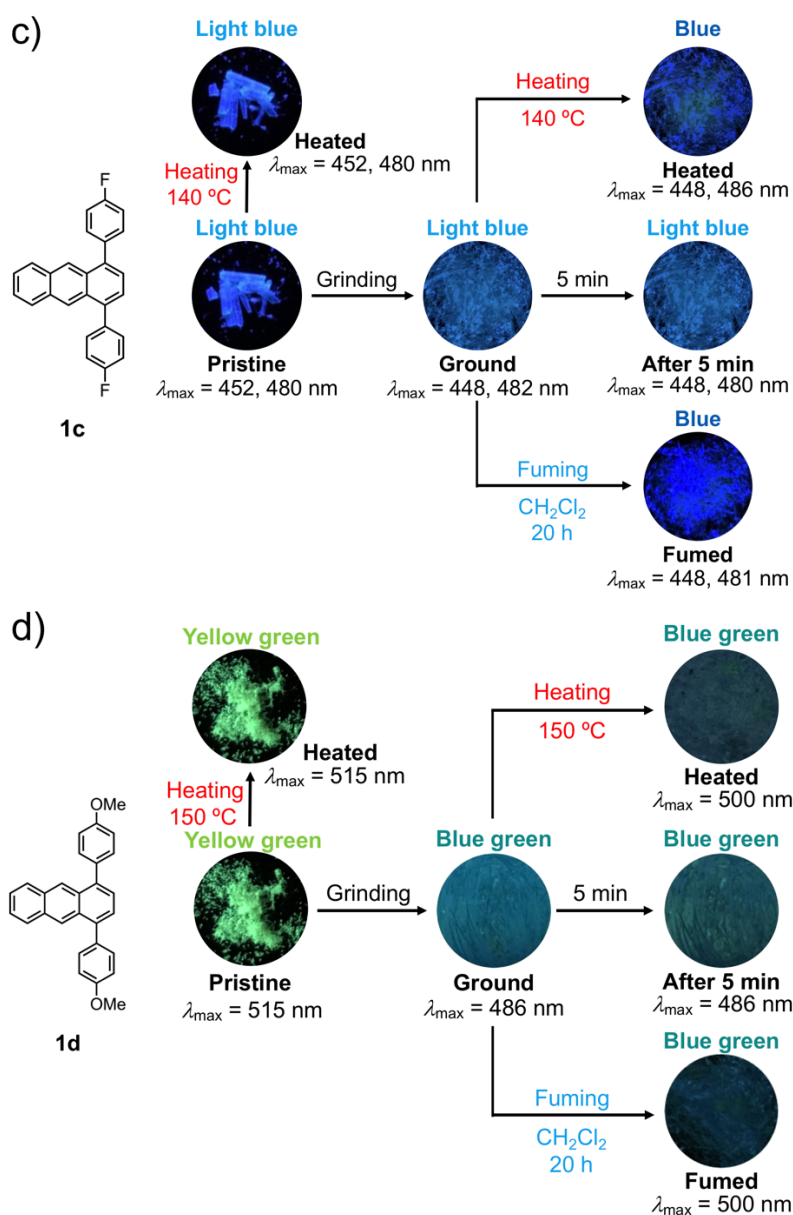

**Figure S2 (contd.).** Fluorescence images of 1,4-diphenylanthracene derivatives pristine, ground, stored (5 min after grinding), heated and fumed samples during a 365 nm UV irradiation, c) **1c** (R=F), b) **1d** (R=OMe).

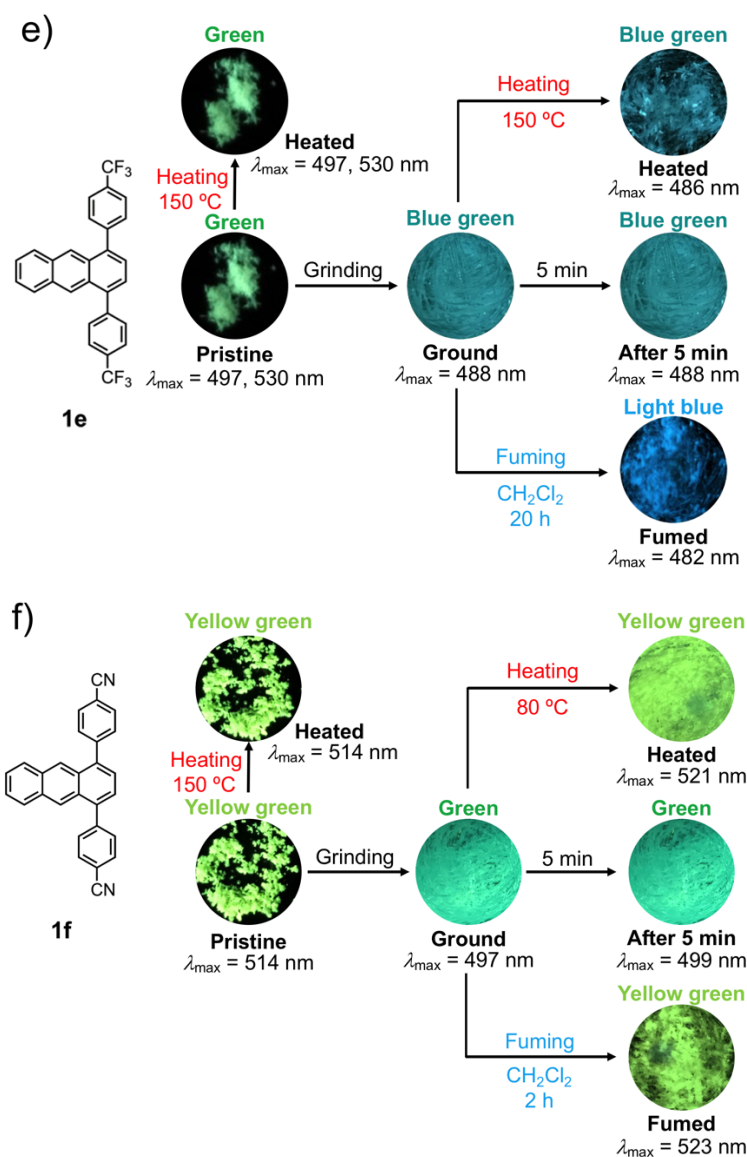

**Figure S2 (contd.).** Fluorescence images of 1,4-diphenylanthracene derivatives pristine, ground, stored (5 min after grinding), heated and fumed samples during a 365 nm UV irradiation, e) **1e** (R=CF<sub>3</sub>), f) **1f** (R=CN).

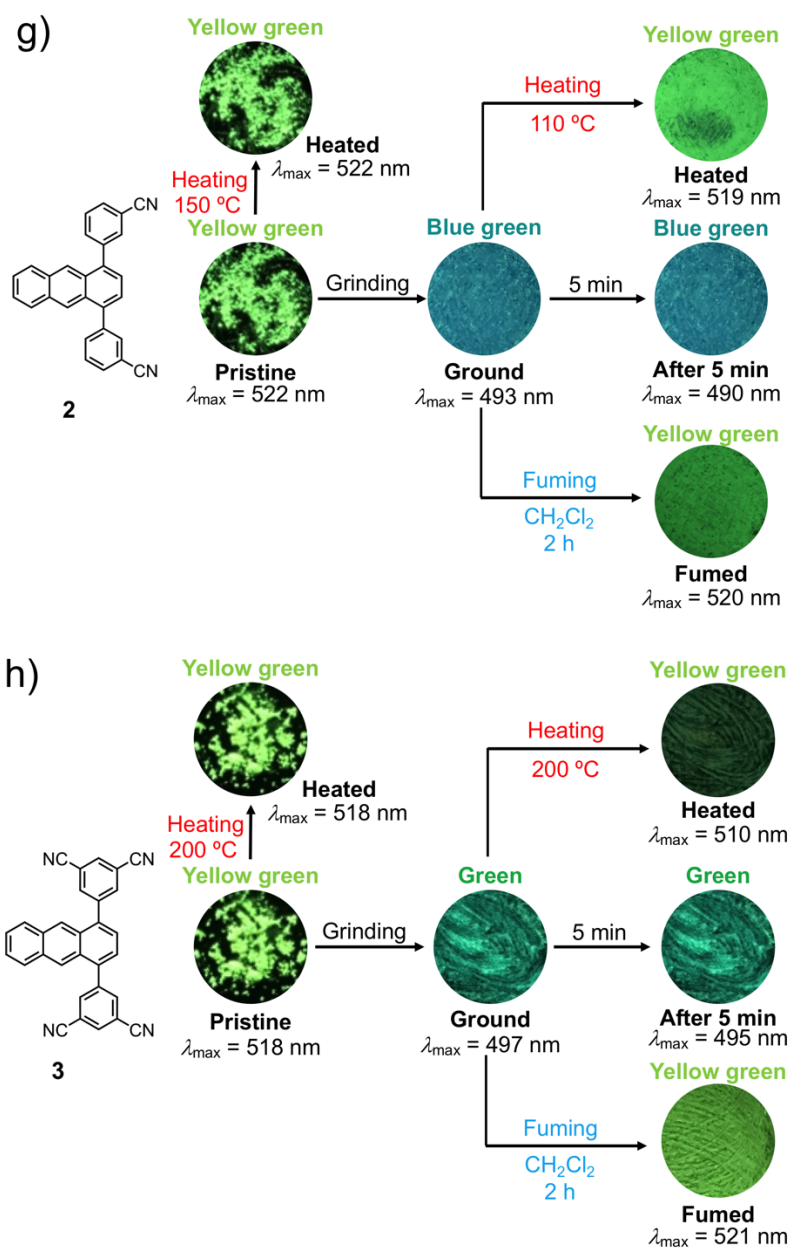

**Figure S2 (contd.).** Fluorescence images of 1,4-diphenylanthracene derivatives pristine, ground, stored (5 min after grinding), heated and fumed samples during a 365 nm UV irradiation, g) **2** (3-CN), h) **3** (3,5-CN<sub>2</sub>, R'=CN).

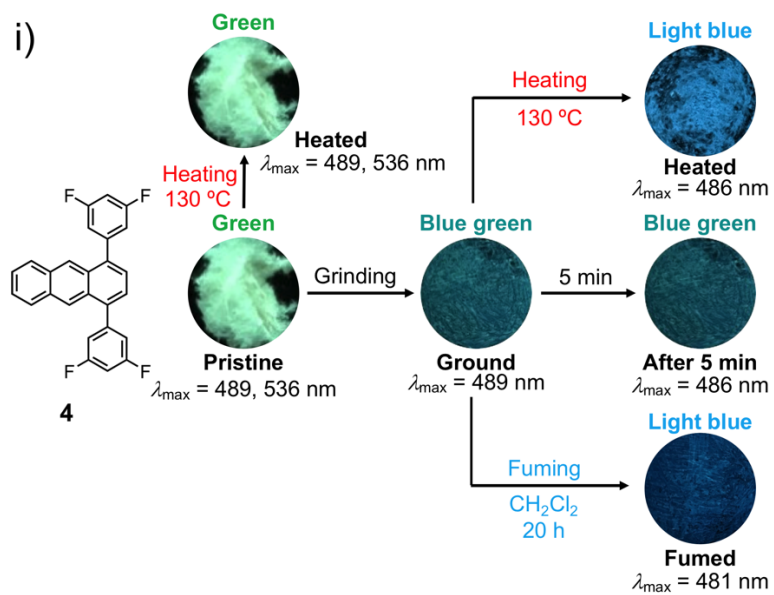

**Figure S2 (contd.).** Fluorescence images of 1,4-diphenylanthracene derivatives pristine, ground, stored (5 min after grinding), heated and fumed samples during a 365 nm UV irradiation, i) **4** (3,5-F<sub>2</sub>, R'=F).

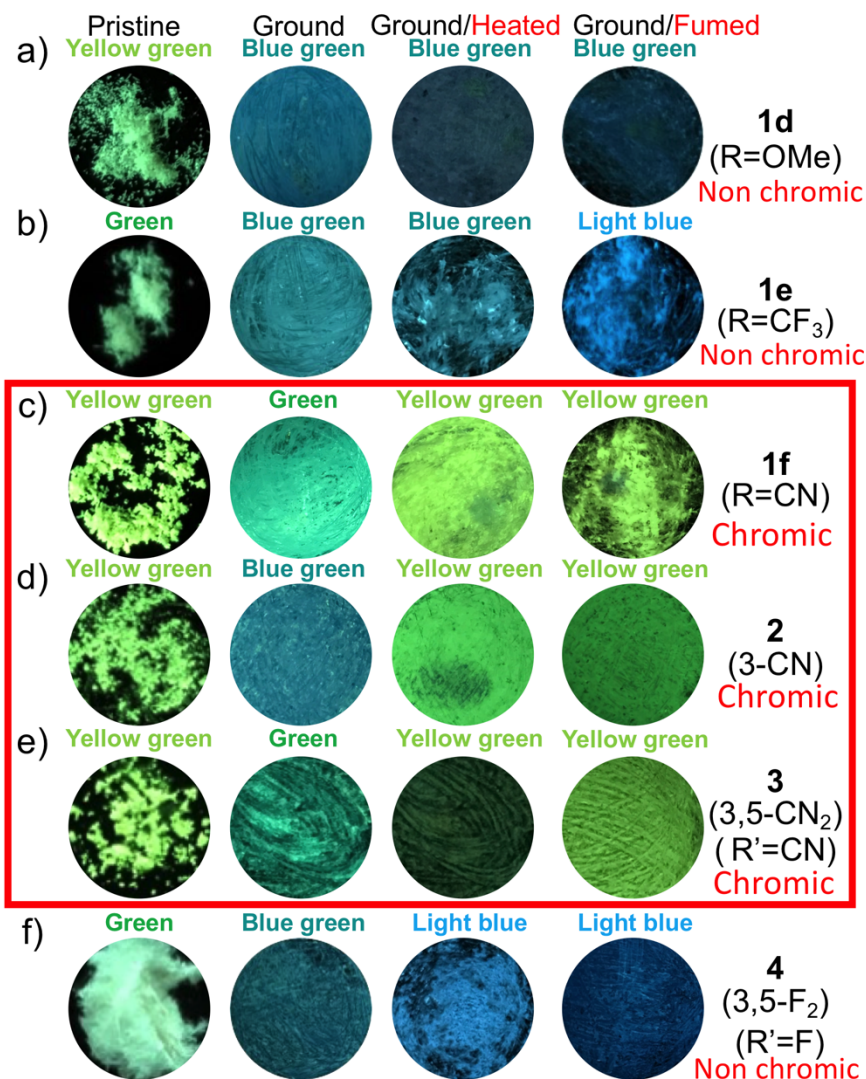

**Figure S3.** Fluorescent images of the pristine, ground, heated and fumed (CH<sub>2</sub>Cl<sub>2</sub> vapor) samples of 1,4-diphenylanthracene derivatives **1d-1f**, and **2-4** during a 365 nm UV irradiation, a) **1d** (R=OMe, heated at 150 °C for 5 min., fumed with CH<sub>2</sub>Cl<sub>2</sub> vapor for 20 h), b) **1e** (R=CF<sub>3</sub>, heated at 150 °C for 5 min., fumed with CH<sub>2</sub>Cl<sub>2</sub> vapor for 20 h), c) **1f** (R=CN, heated at 80 °C for 5 min., fumed with CH<sub>2</sub>Cl<sub>2</sub> vapor for 2 h), d) **2** (3-CN, heated at 110 °C for 5 min., fumed with CH<sub>2</sub>Cl<sub>2</sub> vapor for 2 h), e) **3** (3,5-CN<sub>2</sub>, R'=CN, heated at 200 °C for 5 min., fumed with CH<sub>2</sub>Cl<sub>2</sub> vapor for 2 h), f) **4** (3,5-F<sub>2</sub>, R'=F, heated at 130 °C for 5 min., fumed with CH<sub>2</sub>Cl<sub>2</sub> vapor for 20 h).



### 1.3 Fluorescence spectra of the pristine, ground, ground-fumed and ground-heated samples of 1,4-diphenylanthracene derivatives

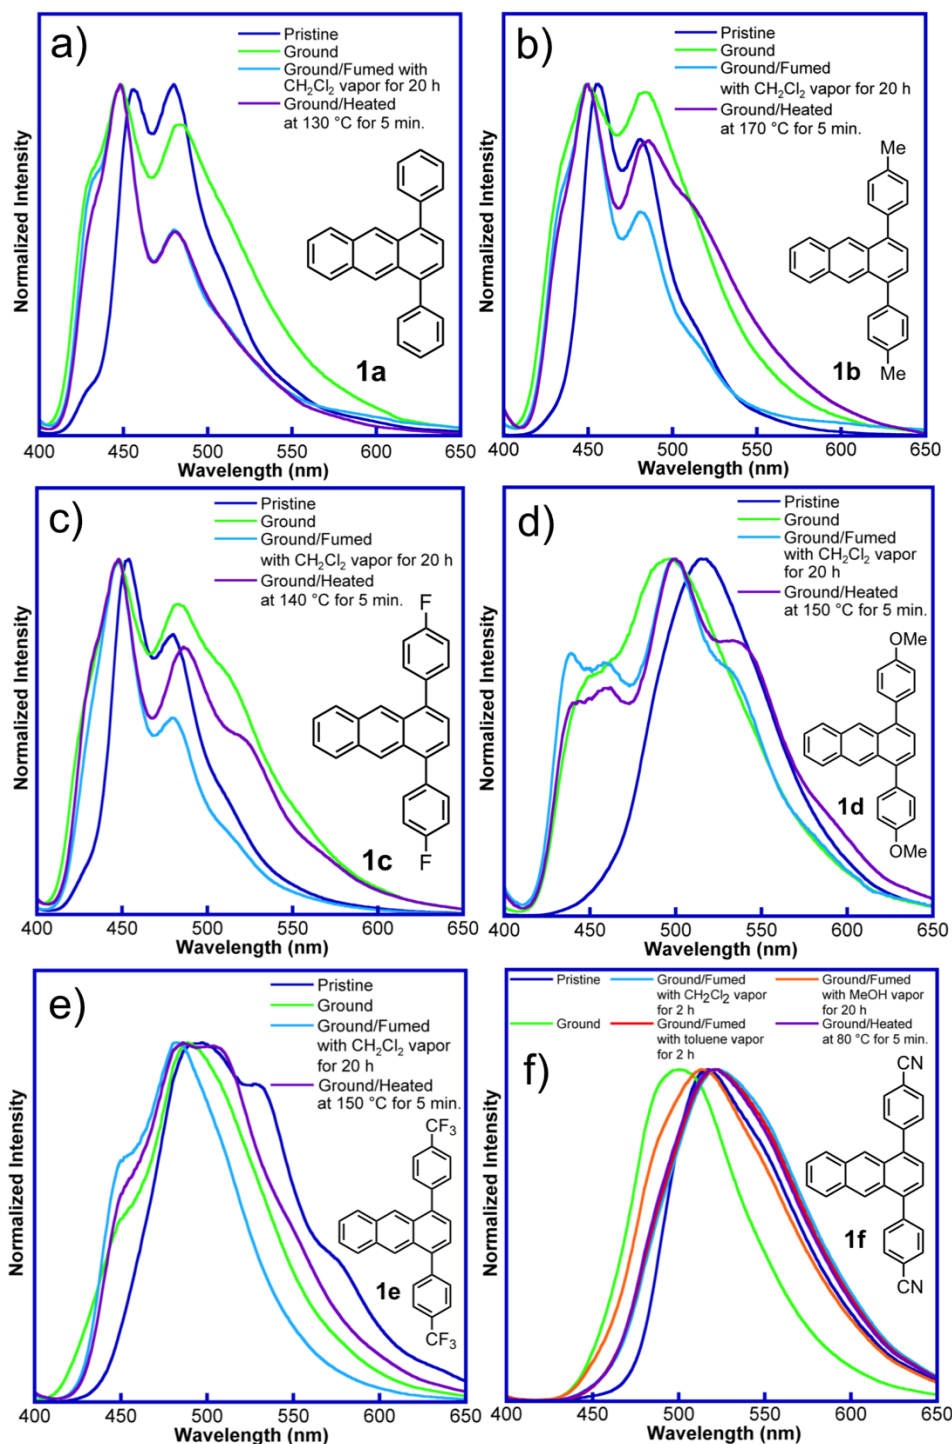

**Figure S4.** Normalized fluorescence spectra of the pristine, ground, ground-fumed and ground-heated samples ( $\lambda_{\text{ex}}=365$  nm), a) **1a** (R=H), b) **1b** (R=Me), c) **1c** (R=F), d) **1d** (R=OMe), e) **1e** (R=CF<sub>3</sub>), f) **1f** (R=CN).

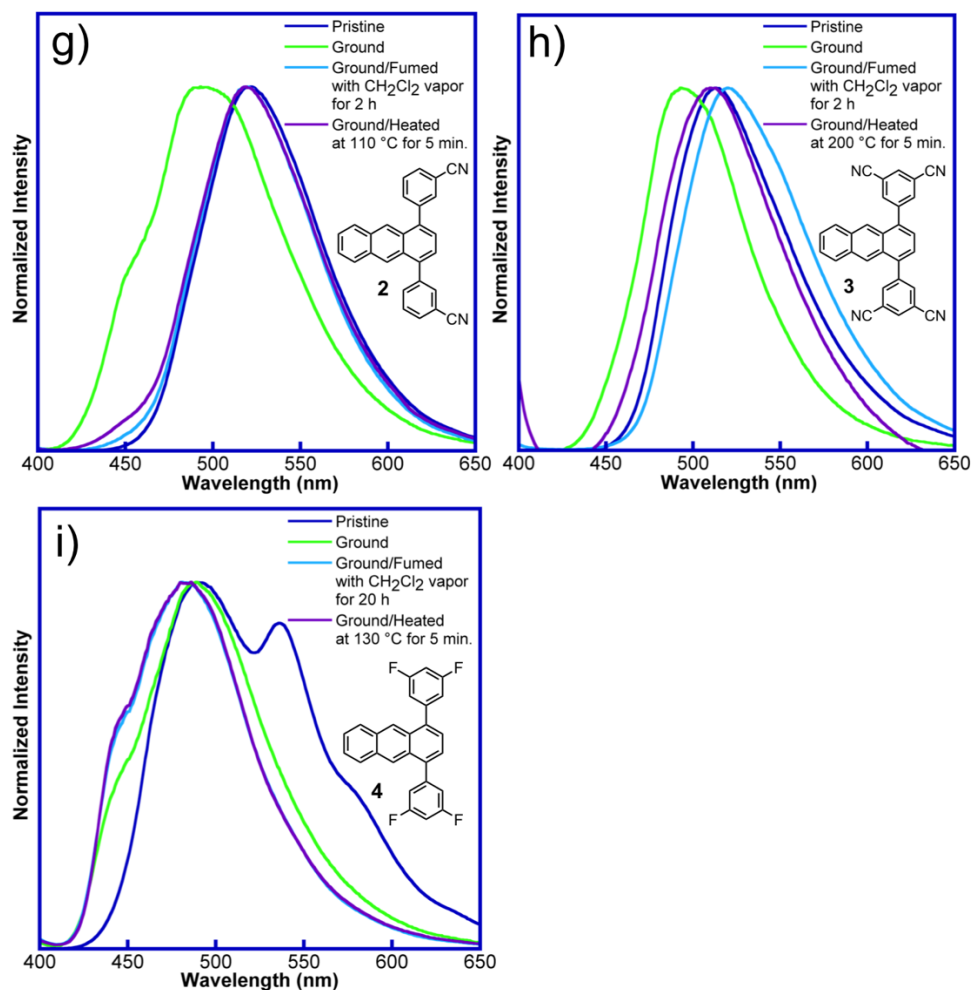

**Figure S4 (contd.).** Normalized fluorescence spectra of the pristine, ground, ground-fumed and ground-heated samples ( $\lambda_{\text{ex}}=365$  nm), g) **2** (3-CN), h) **3** (3,5-CN<sub>2</sub>, R'=CN), i) **4** (3,5-F<sub>2</sub>, R'=F).



#### 1.4 Vapochromic properties of 1,4-diphenylanthracene derivatives

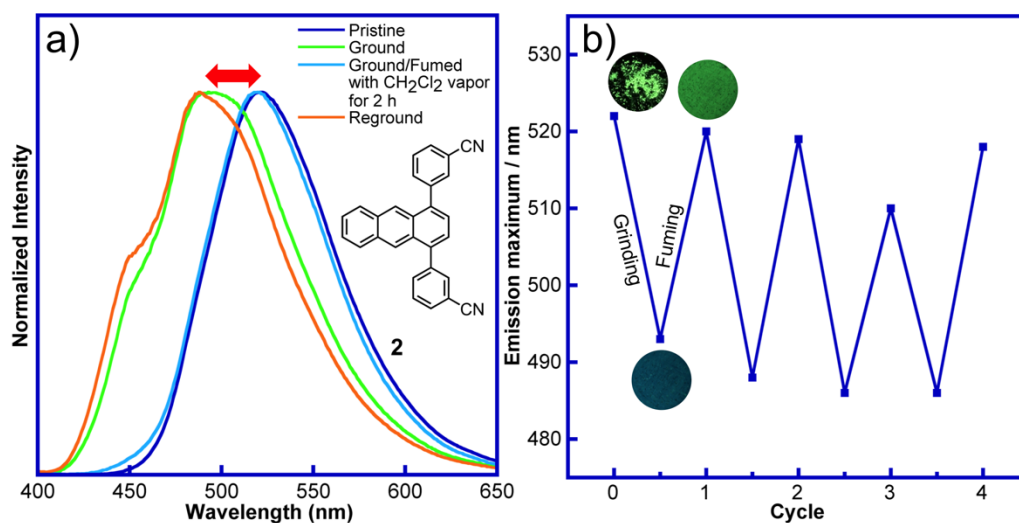

**Figure S5.** Vapochromic properties of 1,4-diphenylanthracene derivative **2** (3-CN), a) fluorescence spectra of pristine, ground, ground-fumed (CH<sub>2</sub>Cl<sub>2</sub> vapor, 2 h) and reground samples, b) repeated grinding-fuming cycles.

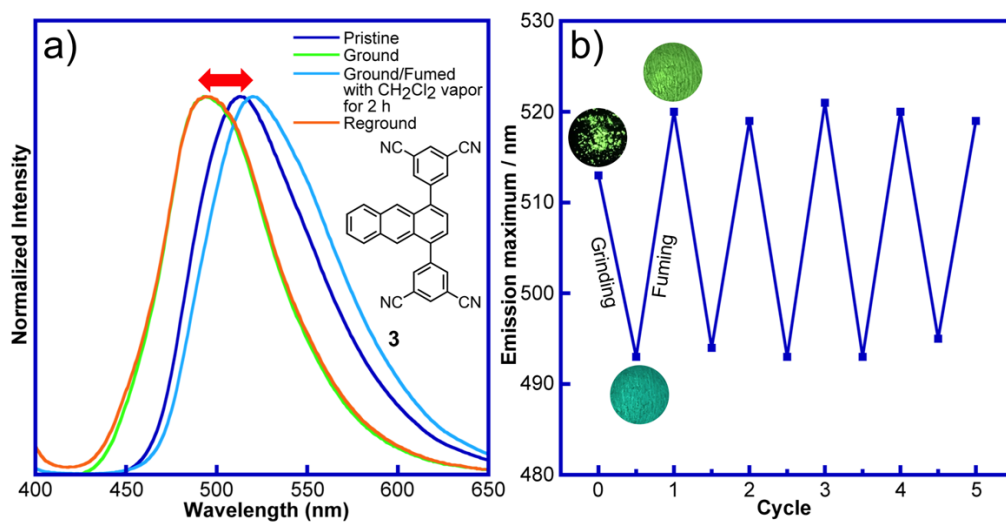

**Figure S6.** Vapochromic properties of 1,4-diphenylanthracene derivative **3** (3,5-CN<sub>2</sub>, R'=CN), a) fluorescence spectra of pristine, ground, ground-fumed (CH<sub>2</sub>Cl<sub>2</sub> vapor, 2 h) and reground samples, b) repeated grinding-fuming cycles.

## 1.5 Thermochromic properties of 1,4-diphenylanthracene derivatives

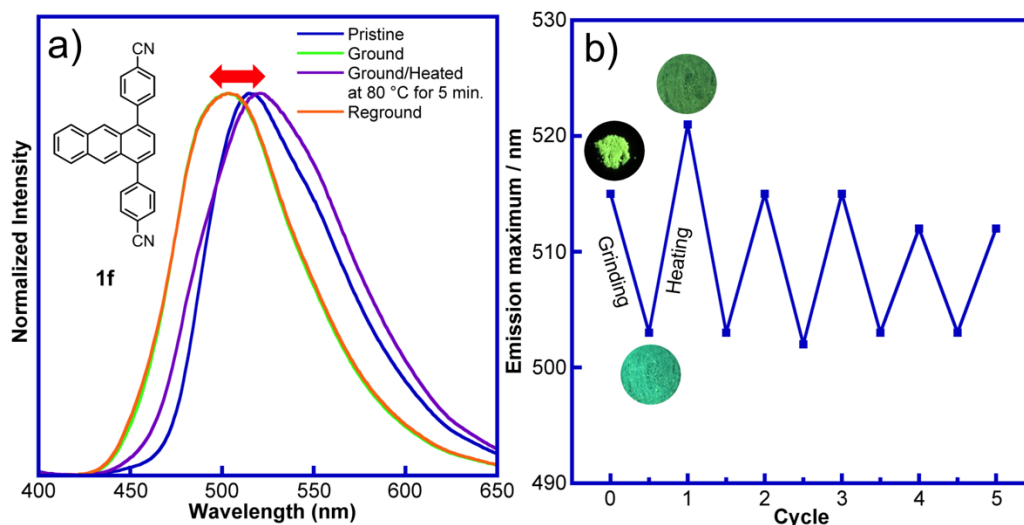

**Figure S7.** Thermochromic properties of 1,4-diphenylanthracene derivative **1f** (R=CN), a) fluorescence spectra of pristine, ground, ground-heated (80 °C for 5 min.) and reground samples, b) repeated grinding-heating cycles.

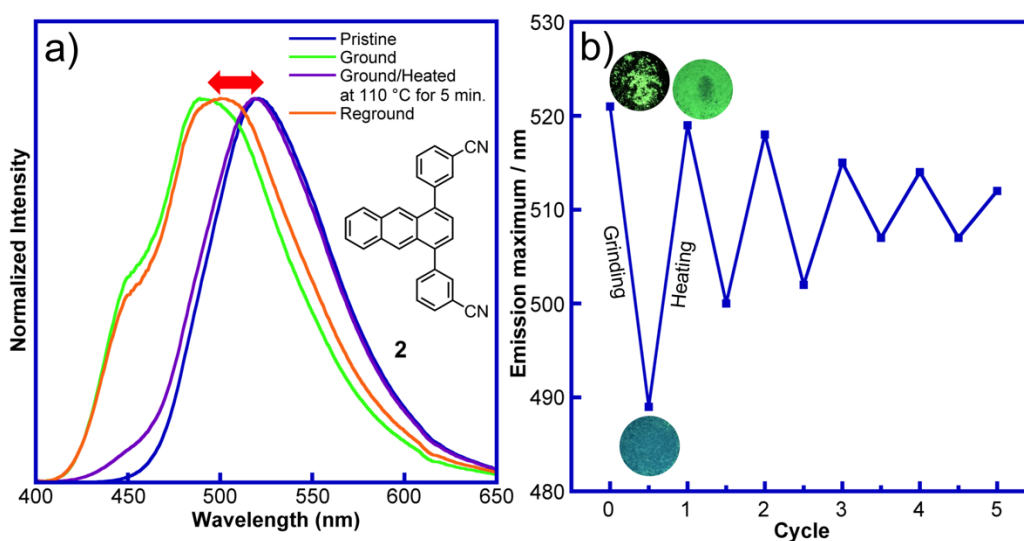

**Figure S8.** Thermochromic properties of 1,4-diphenylanthracene derivative **2** (3-CN), a) fluorescence spectra of pristine, ground, ground-heated (110 °C for 5 min.) and reground samples, b) repeated grinding-heating cycles.

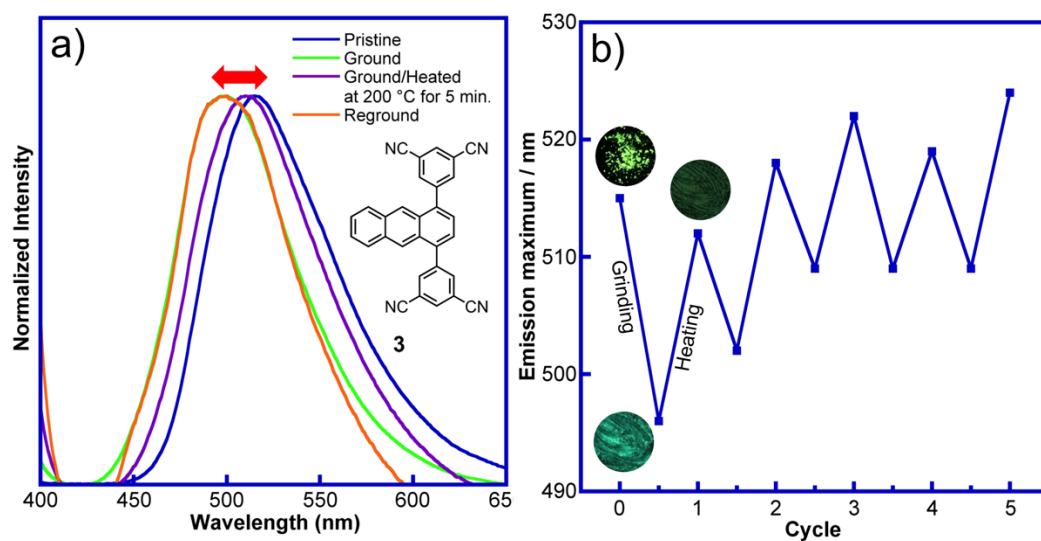

**Figure S9.** Thermochromic properties of 1,4-diphenylanthracene derivative **3** (3,5-CN<sub>2</sub>, R'=CN), a) fluorescence spectra of pristine, ground, ground-heated (200 °C for 5 min.) and reground samples, b) repeated grinding-heating cycles.

## 1.6 IR spectra of the CN-substituted 1,4-diphenylanthracene derivatives 1f, 2

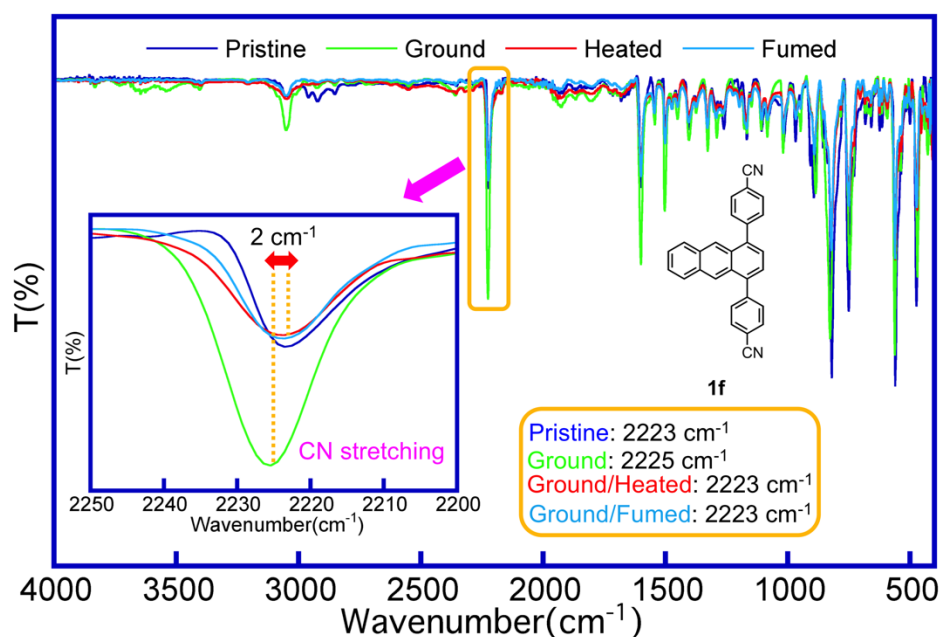

**Figure S10.** IR spectra of the CN-substituted 1,4-diphenylanthracene derivative **1f** before grinding (pristine), after grinding (ground), ground-heated (80 °C for 5 min) and ground-fumed (with CH<sub>2</sub>Cl<sub>2</sub> vapor for 2 h) samples in the CN stretching region.

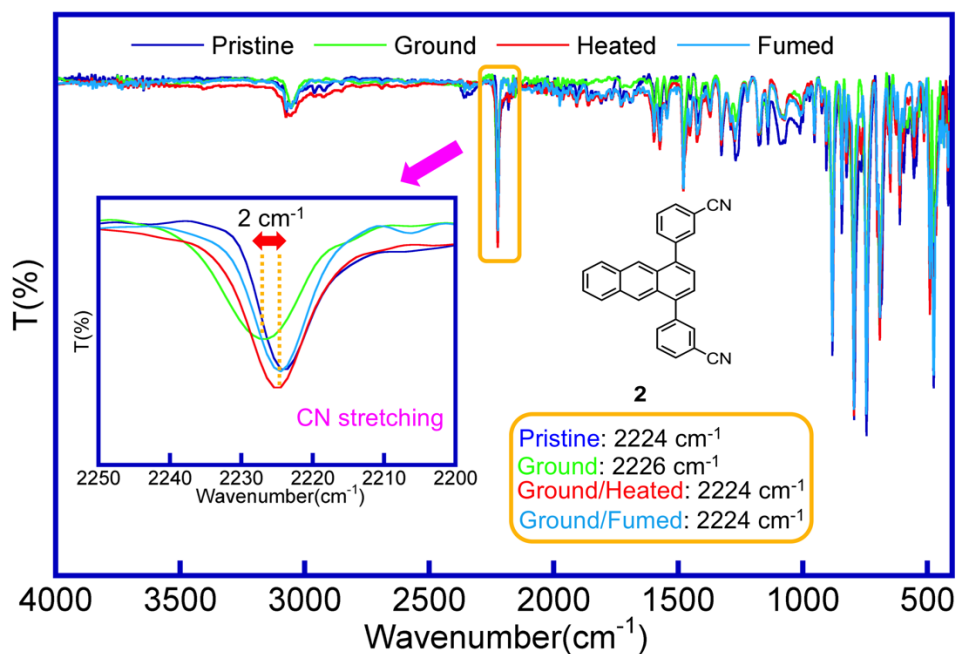

**Figure S11.** IR spectra of the CN-substituted 1,4-diphenylanthracene derivative **2** before grinding (pristine), after grinding (ground), ground-heated (110 °C for 5 min) and ground-fumed (with CH<sub>2</sub>Cl<sub>2</sub> vapor for 2 h) samples in the CN stretching region.

## 1.7 DSC profiles of 1,4-diphenylanthracene derivatives

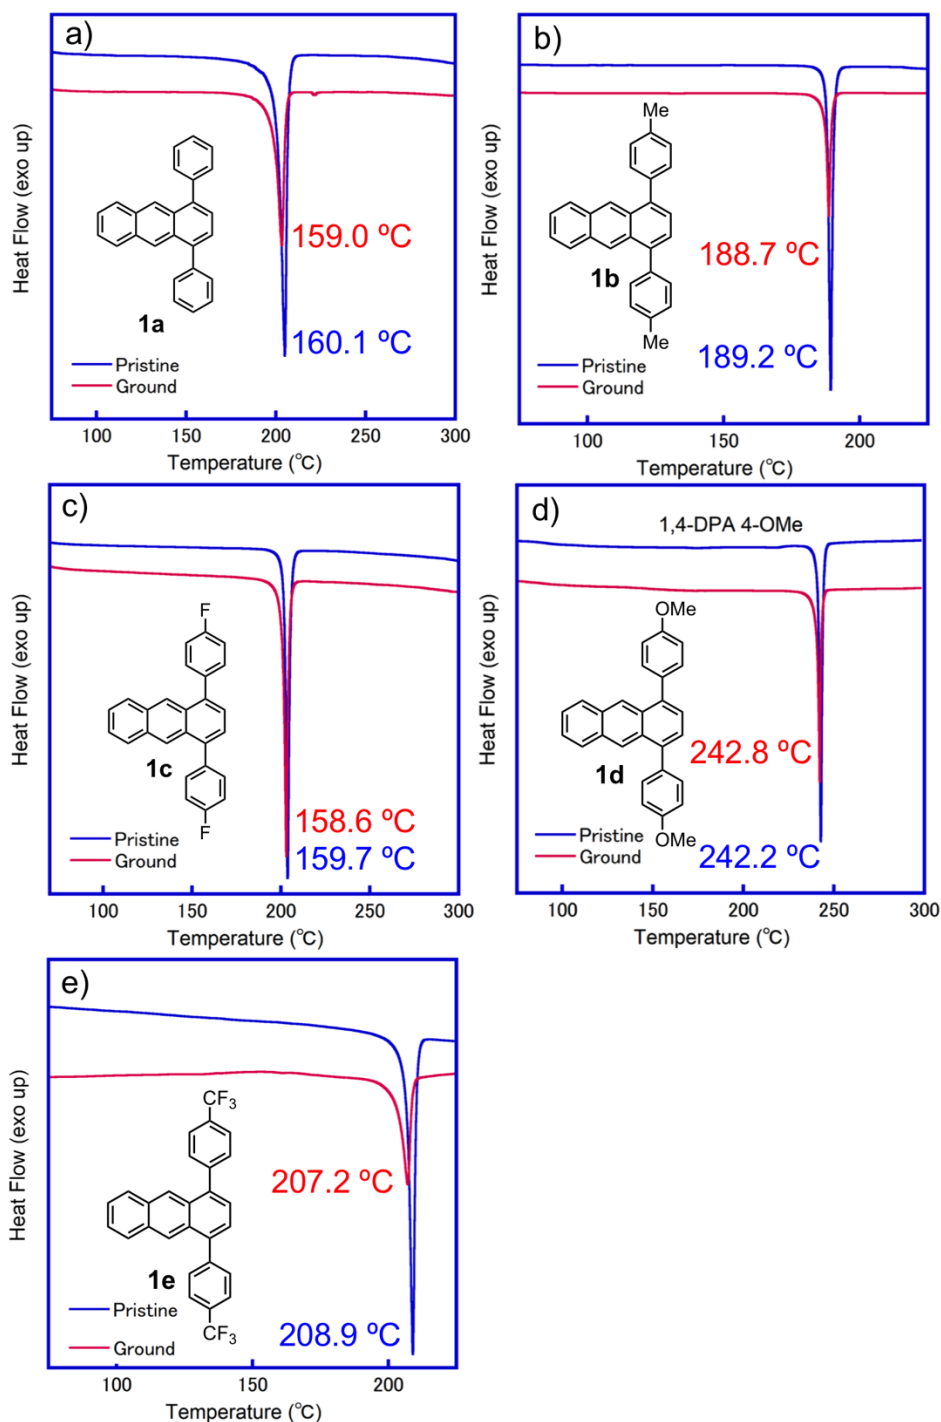

**Figure S12.** DSC profiles of 1,4-diphenylanthracene derivatives before grinding (pristine) and after grinding (ground), a) **1a** (R=H), b) **1b** (R=Me), c) **1c** (R=F), d) **1d** (R=OMe), e) **1e** (R=CF<sub>3</sub>).

## 1.8 UV-vis absorption spectra of the pristine and ground samples

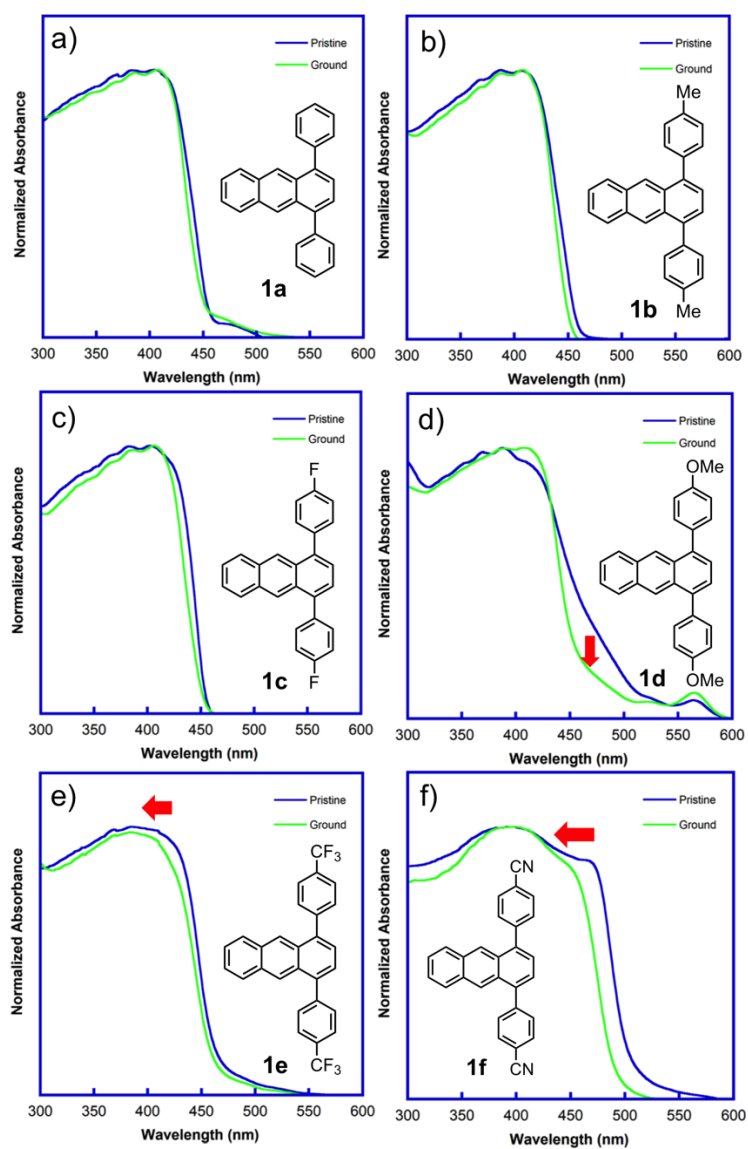

**Figure S13.** UV-vis absorption spectra of the pristine and ground samples of the 1,4-diphenylanthracene derivatives, a) **1a** (R=H), b) **1b** (R=Me), c) **1c** (R=F), d) **1d** (R=OMe), e) **1e** (R=CF<sub>3</sub>), f) **1f** (R=CN).

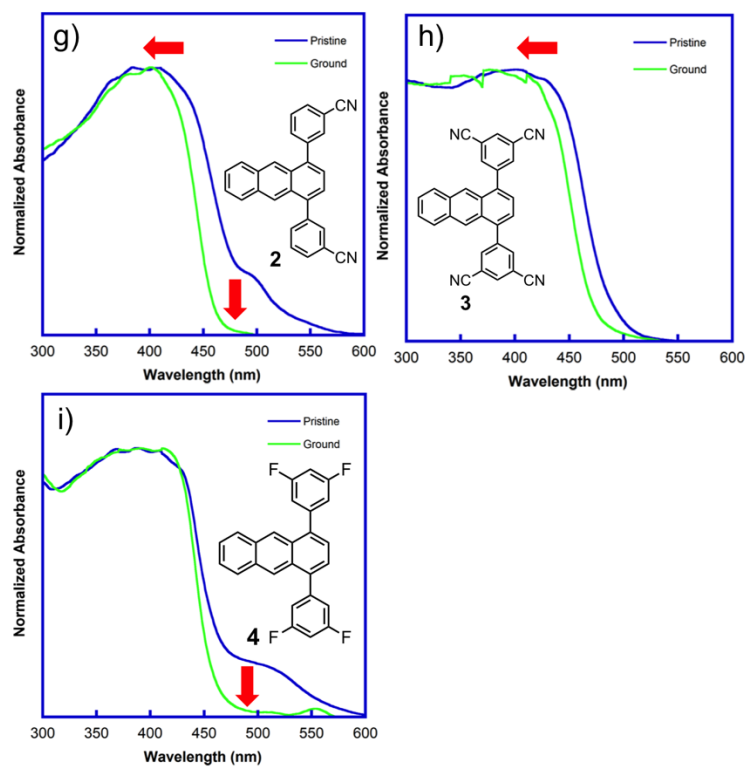

**Figure S13 (contd.).** UV-vis absorption spectra of the pristine and ground samples of the 1,4-diphenylanthracene derivatives, g) **2** (3-CN), h) **3** (3,5-CN<sub>2</sub>, R'=CN), i) **4** (3,5-F<sub>2</sub>, R'=F).

### 1.9 UV-vis absorption spectra of 1,4-diphenylanthracene derivatives (in CHCl<sub>3</sub>)

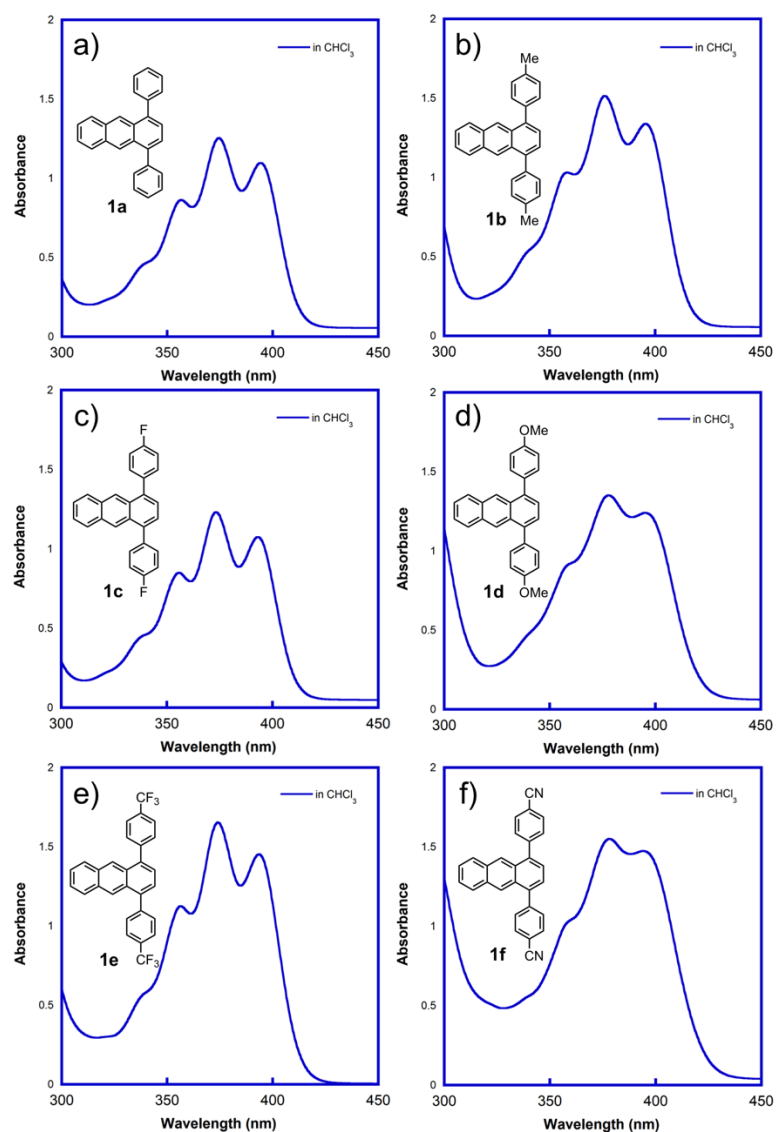

**Figure S14.** UV-vis absorption spectra of 1,4-diphenylanthracene derivatives (0.1 mM in CHCl<sub>3</sub>), a) **1a** (R=H), b) **1b** (R=Me), c) **1c** (R=F), d) **1d** (R=OMe), e) **1e** (R=CF<sub>3</sub>), f) **1f** (R=CN).



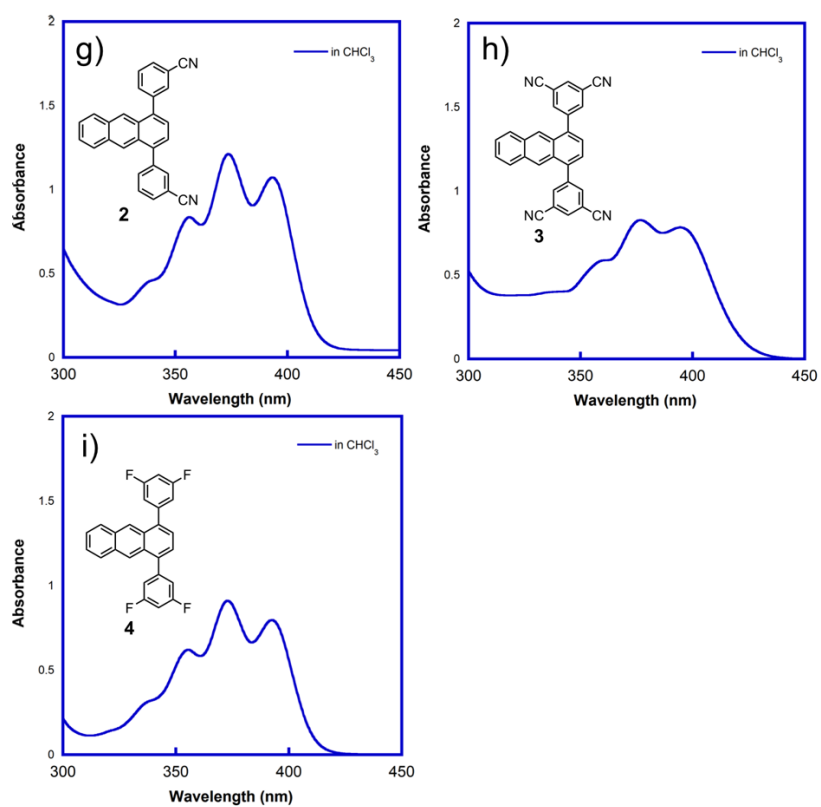

**Figure S14 (contd.).** UV-vis absorption spectra of 1,4-diphenylanthracene derivatives (0.1 mM in  $\text{CHCl}_3$ ), g) **2** (3-CN), h) **3** (3,5-CN<sub>2</sub>, R'=CN), i) **4** (3,5-F<sub>2</sub>, R'=F).

### 1.10 Fluorescence spectra of 1,4-diphenylanthracene derivatives (in $\text{CHCl}_3$ )

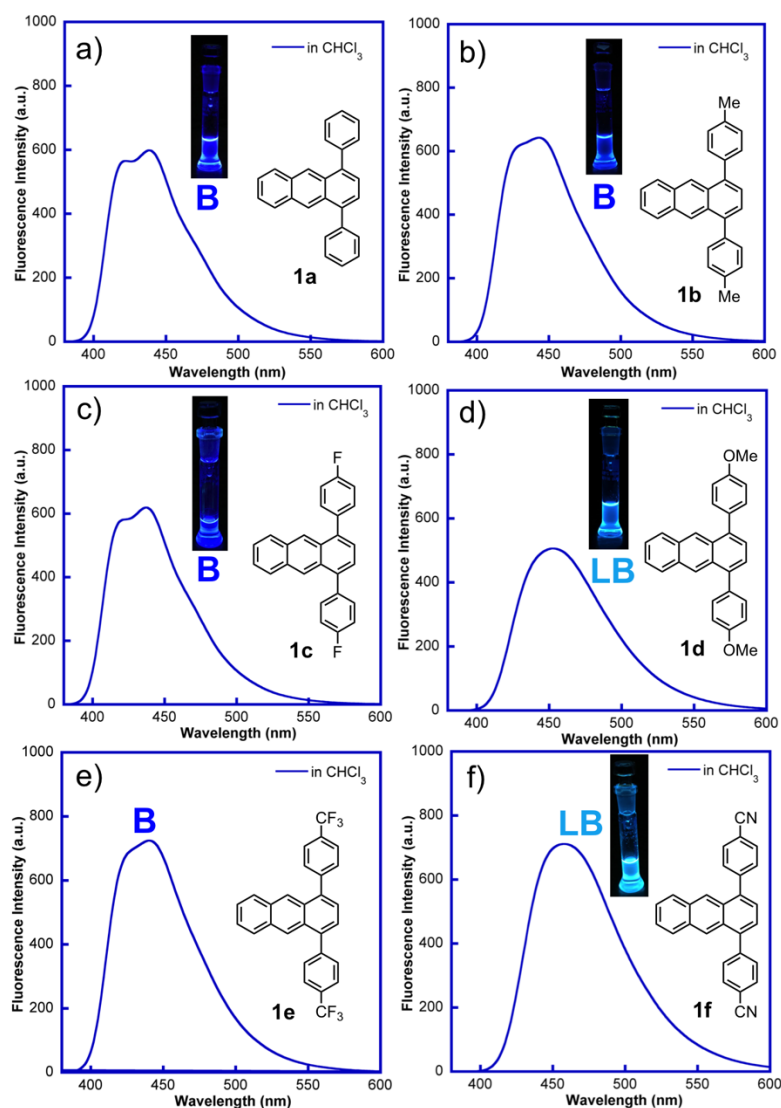

**Figure S15.** Fluorescence spectra of 1,4-diphenylanthracene derivatives (25  $\mu\text{M}$  in  $\text{CHCl}_3$ ,  $\lambda_{\text{ex}} = 365$  nm): a) **1a** (R=H), b) **1b** (R=Me), c) **1c** (R=F), d) **1d** (R=OMe), e) **1e** (R=CF<sub>3</sub>), f) **1f** (R=CN).

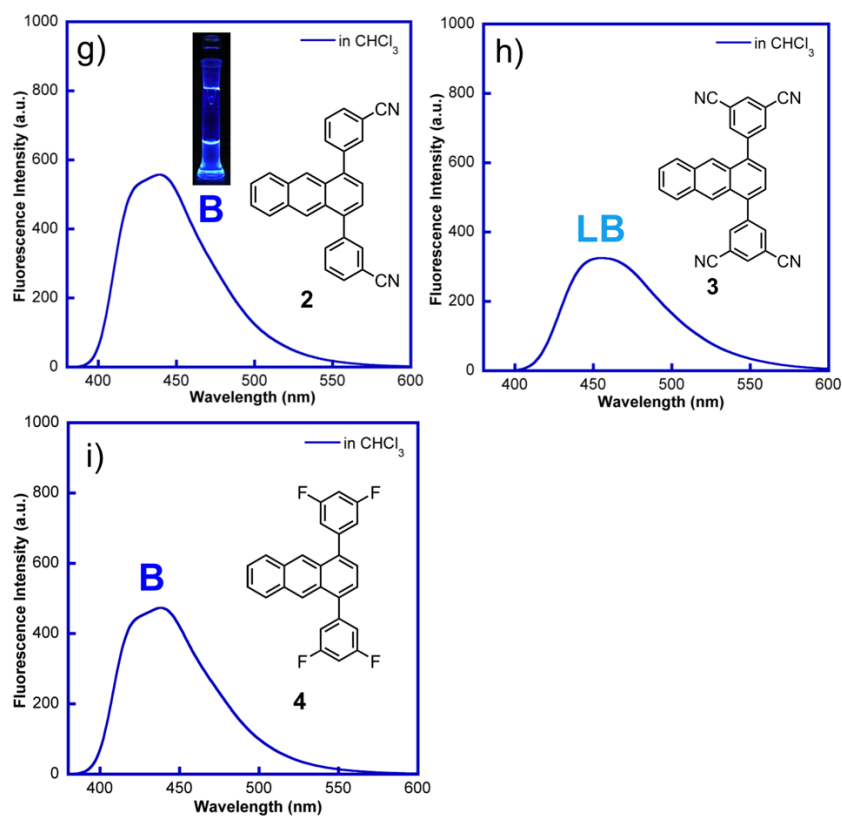

**Figure S15 (contd.).** Fluorescence spectra of 1,4-diphenylanthracene derivatives (25  $\mu$ M in  $\text{CHCl}_3$ ,  $\lambda_{\text{ex}} = 365$  nm): g) **2** (3- CN), h) **3** (3,5- $\text{CN}_2$ ,  $\text{R}'=\text{CN}$ ), i) **4** (3,5- $\text{F}_2$ ,  $\text{R}'=\text{F}$ ).

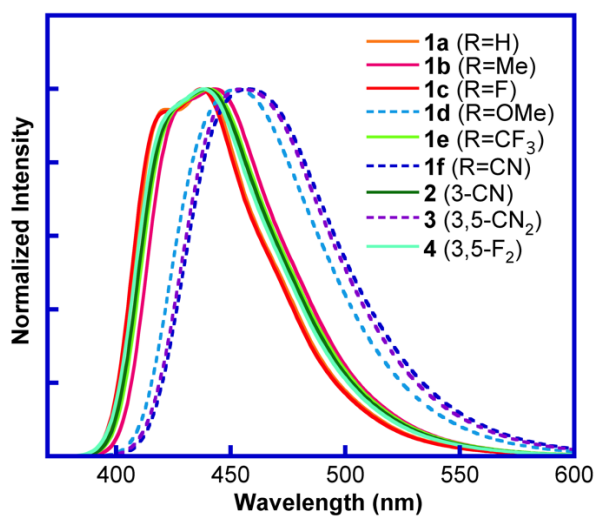

**Figure S16.** Fluorescence spectra of 1,4-diphenylanthracene derivatives (25  $\mu$ M in  $\text{CHCl}_3$ ,  $\lambda_{\text{ex}} = 365$  nm).

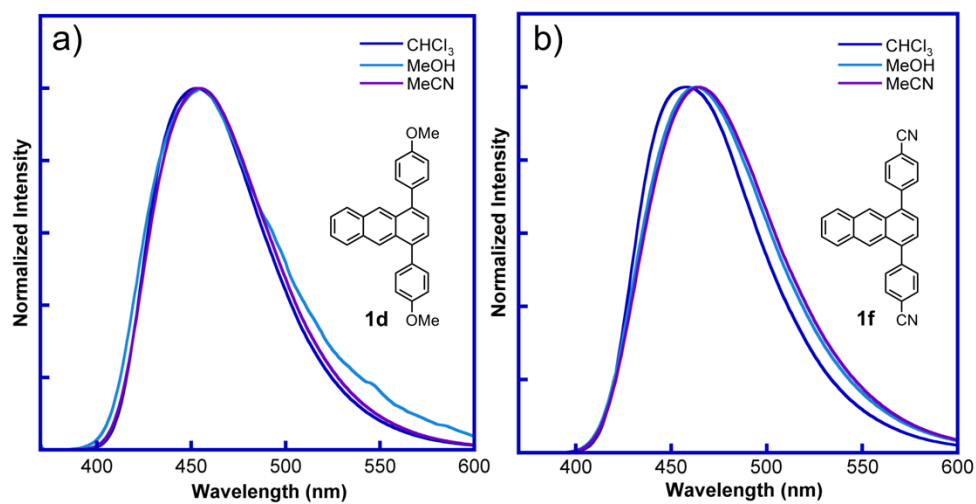

**Figure S17.** Fluorescence spectra of 1,4-diphenylanthracene derivatives (25  $\mu\text{M}$  in different solvents,  $\lambda_{\text{ex}} = 365 \text{ nm}$ ): a) **1d** (R=OMe), b) **1f** (R=CN).

## 1.11 Fluorescence spectra of 1,4-diphenylanthracene derivatives in PMMA film

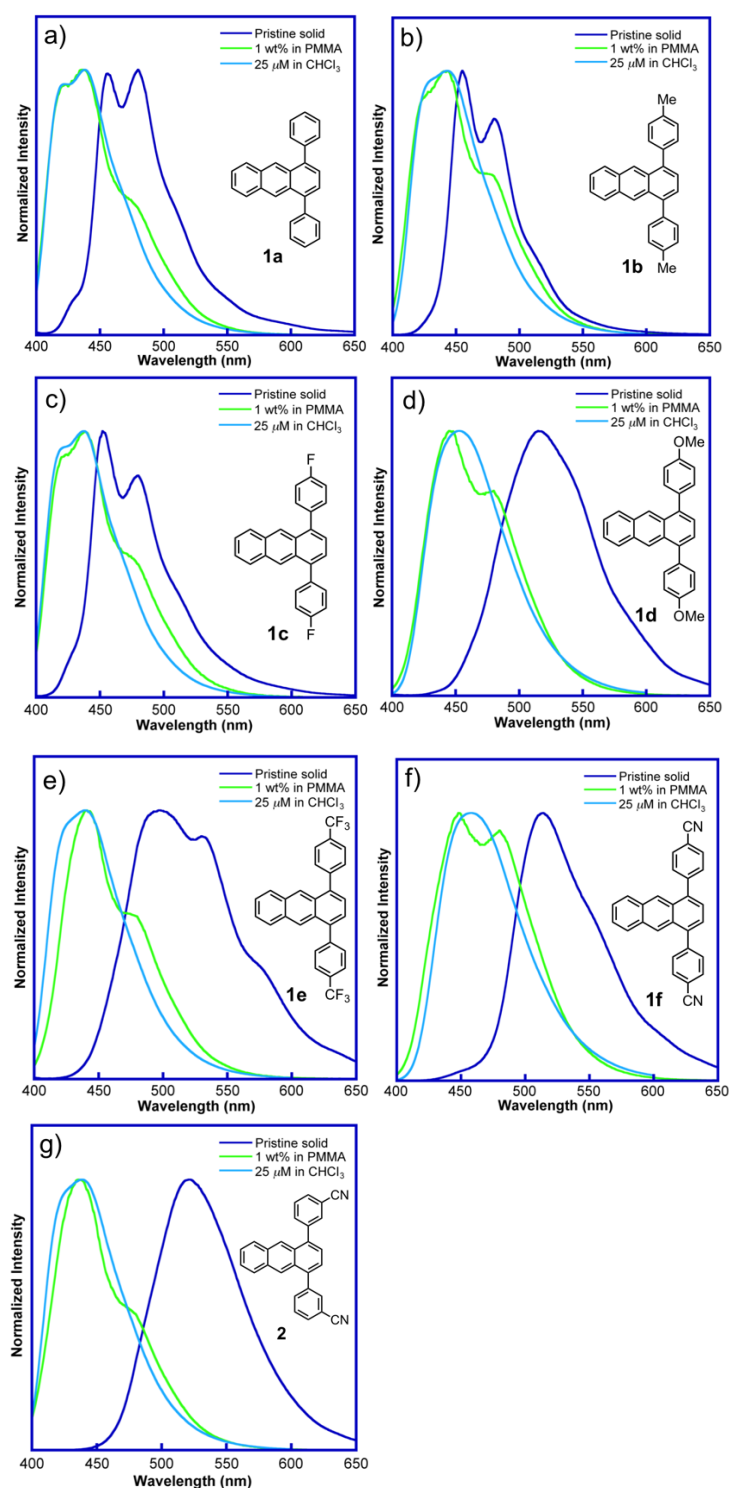

**Figure S18.** Fluorescence spectra of 1,4-diphenylanthracene derivatives in pristine solid, 25  $\mu\text{M}$  in  $\text{CHCl}_3$  solution, 1 wt% in PMMA film ( $\lambda_{\text{ex}} = 365 \text{ nm}$ ), a) **1a** ( $\text{R}=\text{H}$ ), b) **1b** ( $\text{R}=\text{Me}$ ), c) **1c** ( $\text{R}=\text{F}$ ), d) **1d** ( $\text{R}=\text{OMe}$ ), e) **1e** ( $\text{R}=\text{CF}_3$ ), f) **1f** ( $\text{R}=\text{CN}$ ), g) **2** (3-CN).

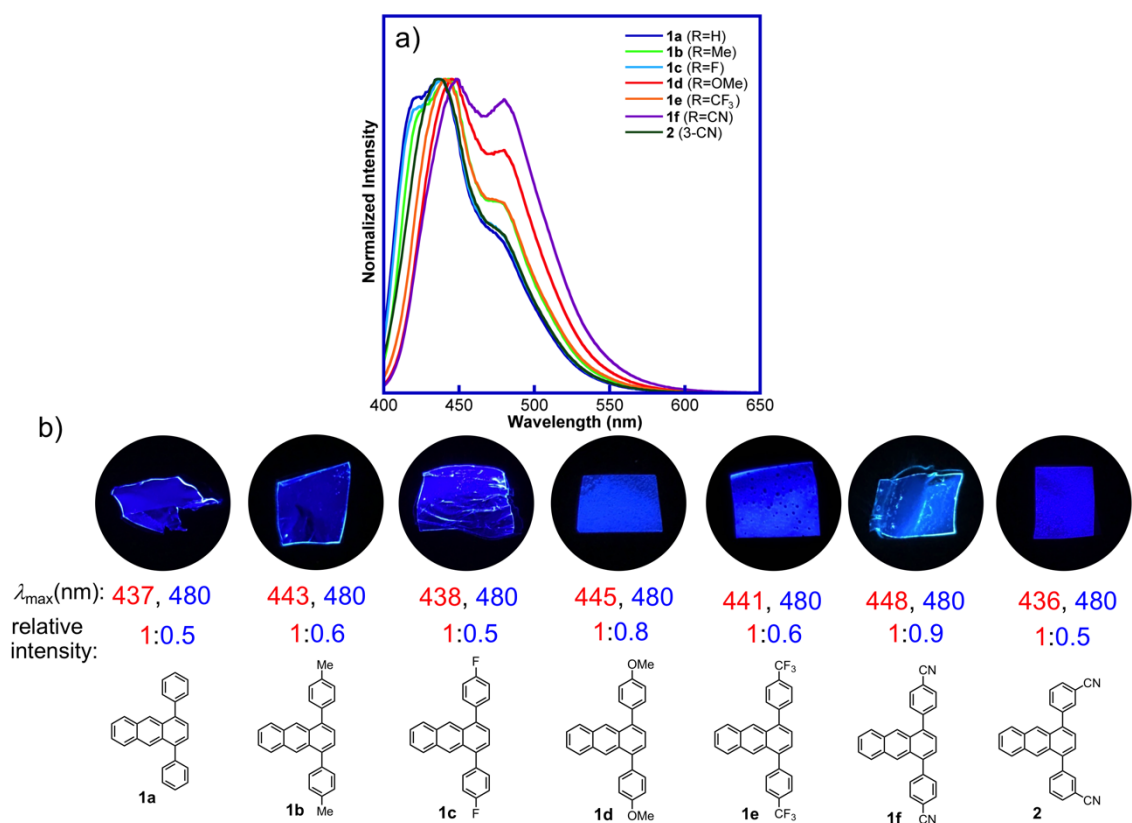

**Figure S19.** Fluorescence spectra and photographs of 1,4-diphenylanthracene derivatives in PMMA film (1 wt%), a) comparison of normalized fluorescence spectra ( $\lambda_{\text{ex}} = 365 \text{ nm}$ ), b) photographs in PMMA film (under 365 nm UV light) and relative intensities of fluorescence spectra.

## 1.12 Fluorescence lifetime decay profiles of pristine, ground, ground-heated and ground-fumed samples of 1,4-diphenylanthracene derivatives

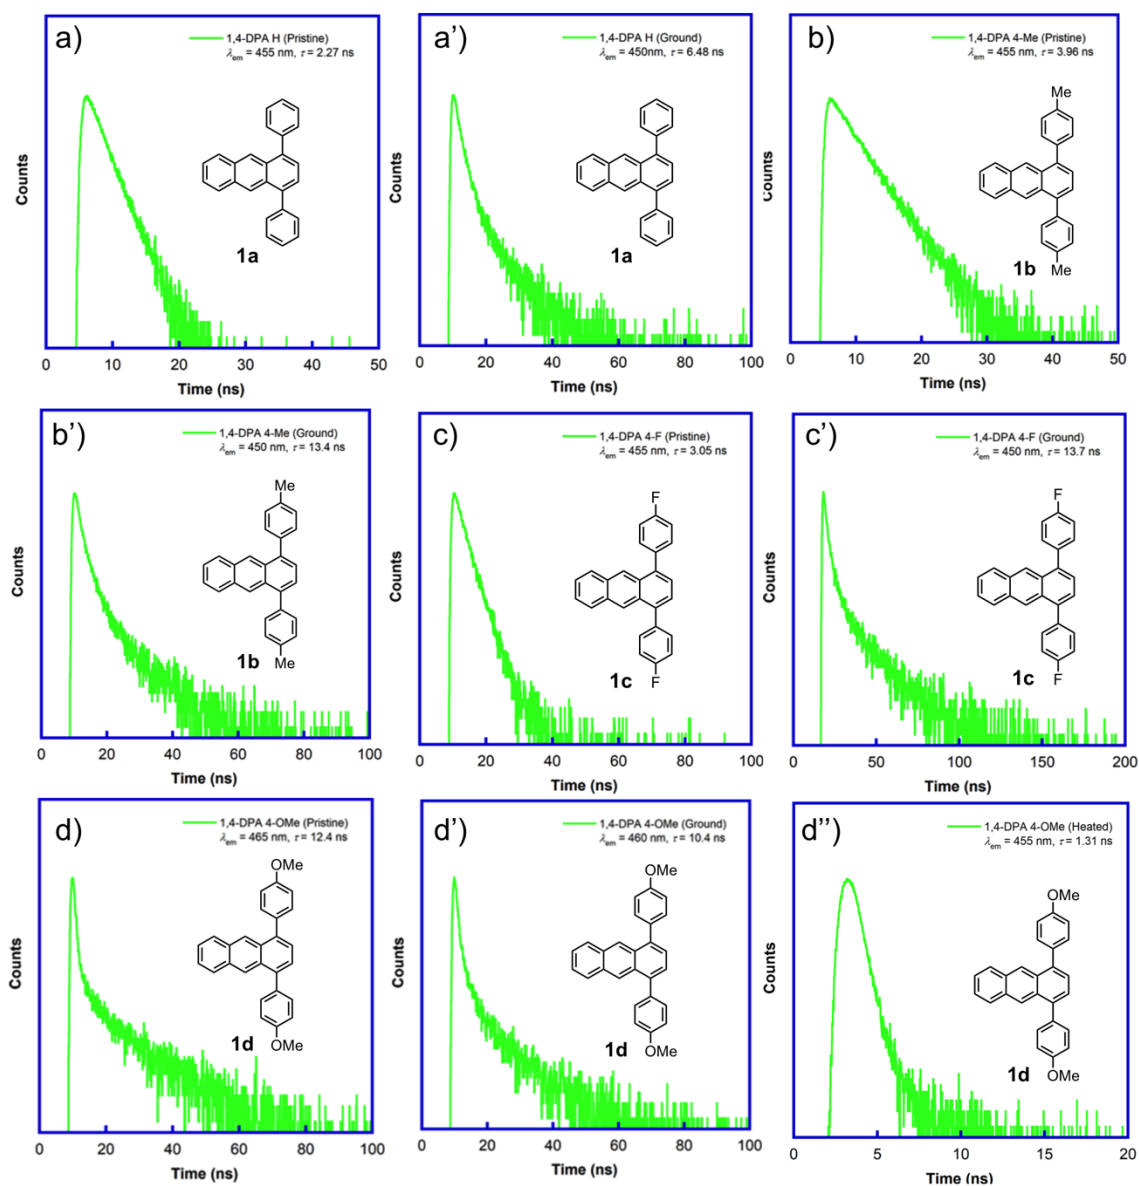

**Figure S20.** Fluorescence lifetime decay profile of pristine, ground, ground-heated and ground-fumed samples of 1,4-diphenylanthracene derivatives ( $\lambda_{ex} = 365 \text{ nm}$ ): a) **1a** (R=H, pristine), a') **1a** (R=H, ground), b) **1b** (R=Me, pristine), b') **1b** (R=Me, ground), c) **1c** (R=F, pristine), c') **1c** (R=F, ground), d) **1d** (R=OMe, pristine), d') **1c** (R=OMe, ground), d'') **1d** (R=OMe, ground-heated, 150 °C for 5 min.).

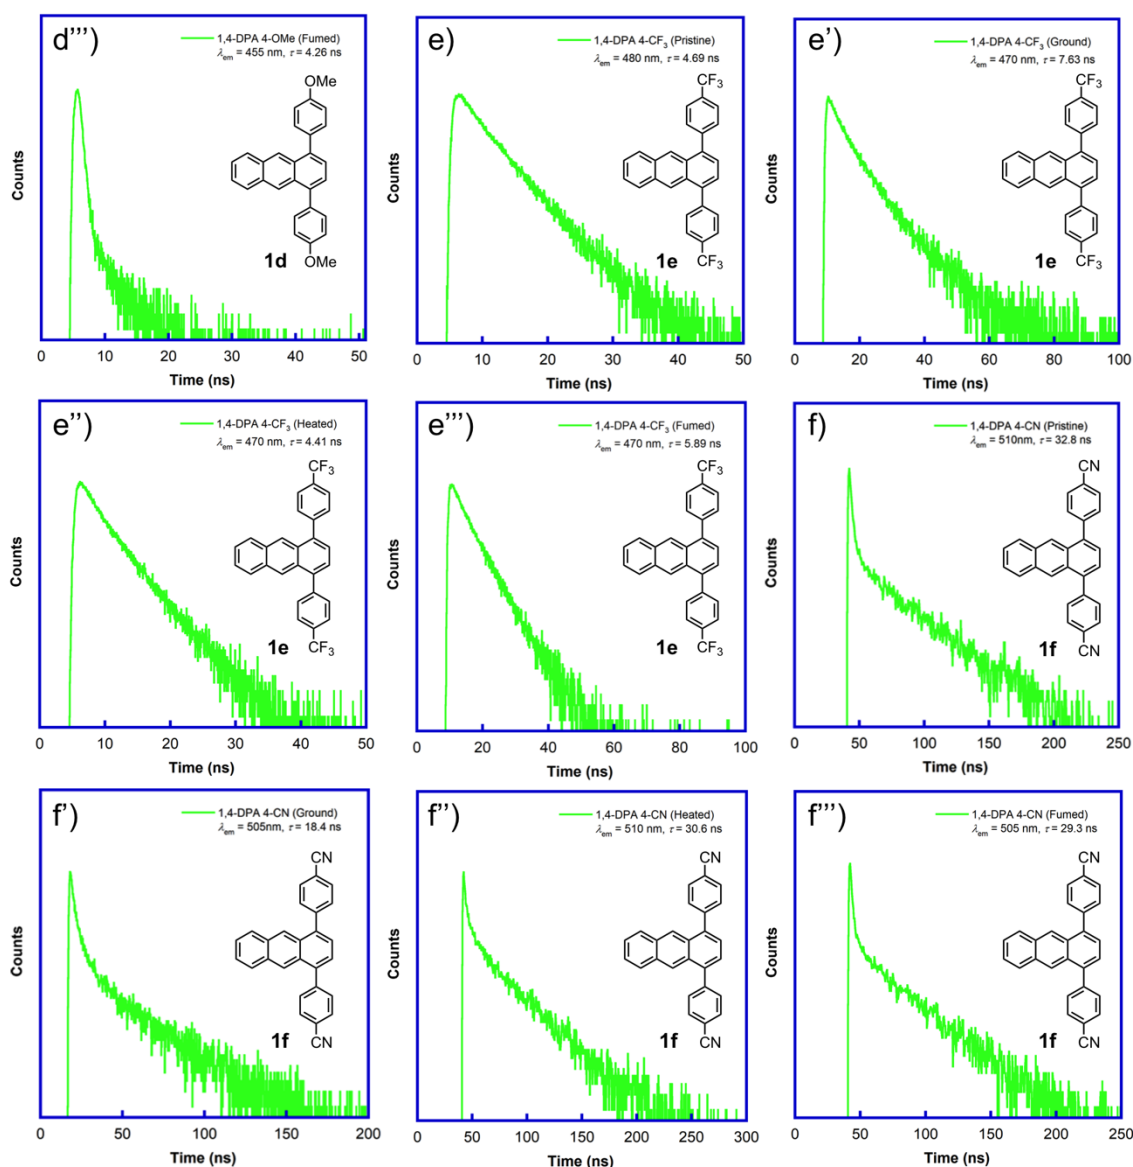

**Figure S20 (contd.).** Fluorescence lifetime decay profile of pristine, ground, ground-heated and ground-fumed samples of 1,4-diphenylanthracene derivatives ( $\lambda_{ex} = 365$  nm): d''') **1c** (R=OMe, ground-fumed, CH<sub>2</sub>Cl<sub>2</sub> vapor for 20 h), e) **1e** (R=CF<sub>3</sub>, pristine), e') **1e** (R=CF<sub>3</sub>, ground), e'') **1e** (R=CF<sub>3</sub>, ground-heated, 150 °C, 5 min.), e''') **1e** (R=CF<sub>3</sub>, ground-fumed, CH<sub>2</sub>Cl<sub>2</sub> vapor for 20 h), f) **1f** (R=CN, pristine), f') **1f** (R=CN, ground), f'') **1f** (R=CN, ground-heated, 80 °C, 5 min.), f''') **1f** (4-CN, ground-fumed, CH<sub>2</sub>Cl<sub>2</sub> vapor for 2 h).



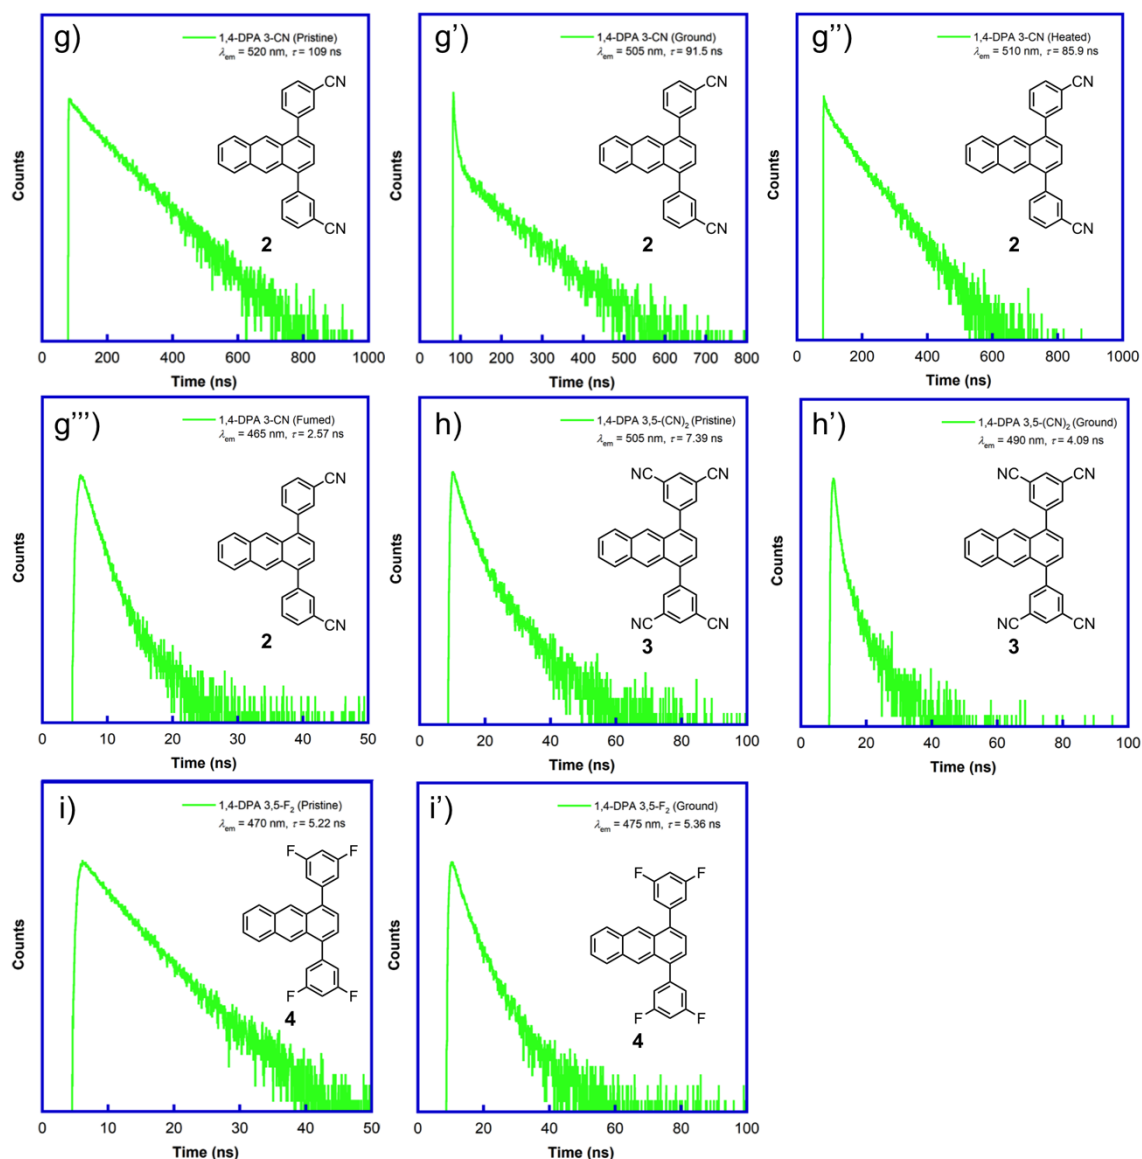

**Figure S20 (cont.).** Fluorescence lifetime decay profile of pristine, ground, ground-heated and ground-fumed samples of 1,4-diphenylanthracene derivatives ( $\lambda_{ex} = 365$  nm): g) **2** (3-CN, pristine), g') **2** (3-CN, ground), g'') **2** (3-CN, ground-heated, 110 °C, 5 min.), g''') **2** (3-CN, ground-fumed, CH<sub>2</sub>Cl<sub>2</sub> vapor for 2h), h) **3** (3,5-CN<sub>2</sub>, R'=CN, pristine), h') **3** (3,5-CN<sub>2</sub>, R'=CN, ground), i) **4** (3,5-F<sub>2</sub>, R'=F, pristine), i') **4** (3,5-F<sub>2</sub>, R'=F, ground).

### 1.13 Fluorescence lifetime decay profiles of 1,4-diphenylanthracene derivatives in $\text{CHCl}_3$ solution

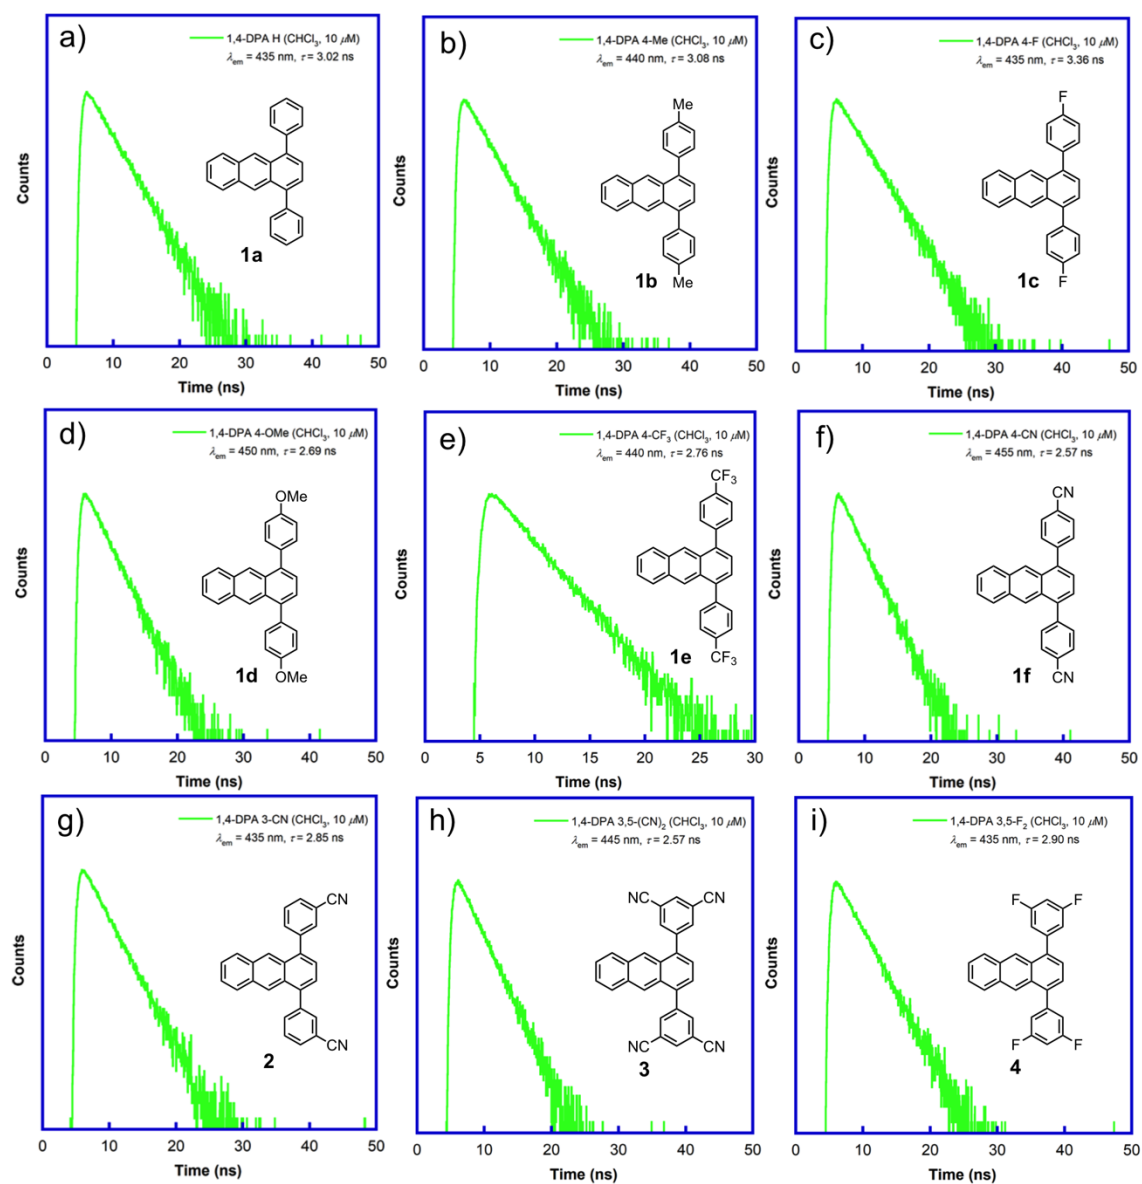

**Figure S21.** Fluorescence lifetime decay profile of 1,4-diphenylanthracene derivatives in  $\text{CHCl}_3$  (10  $\mu\text{M}$ ,  $\lambda_{\text{ex}} = 365 \text{ nm}$ ) after Ar bubbling: a) **1a** (R=H), b) **1b** (R=Me), c) **1c** (R=F), d) **1d** (R=OMe), e) **1e** (R=CF<sub>3</sub>), f) **1f** (R=CN), g) **2** (3-CN), h) **3** (3,5-CN<sub>2</sub>, R'=CN), i) **4** (3,5-F<sub>2</sub>, R'=F).

## 1.14 Fluorescence lifetime decay profiles of 1,4-diphenylanthracene derivatives in PMMA film

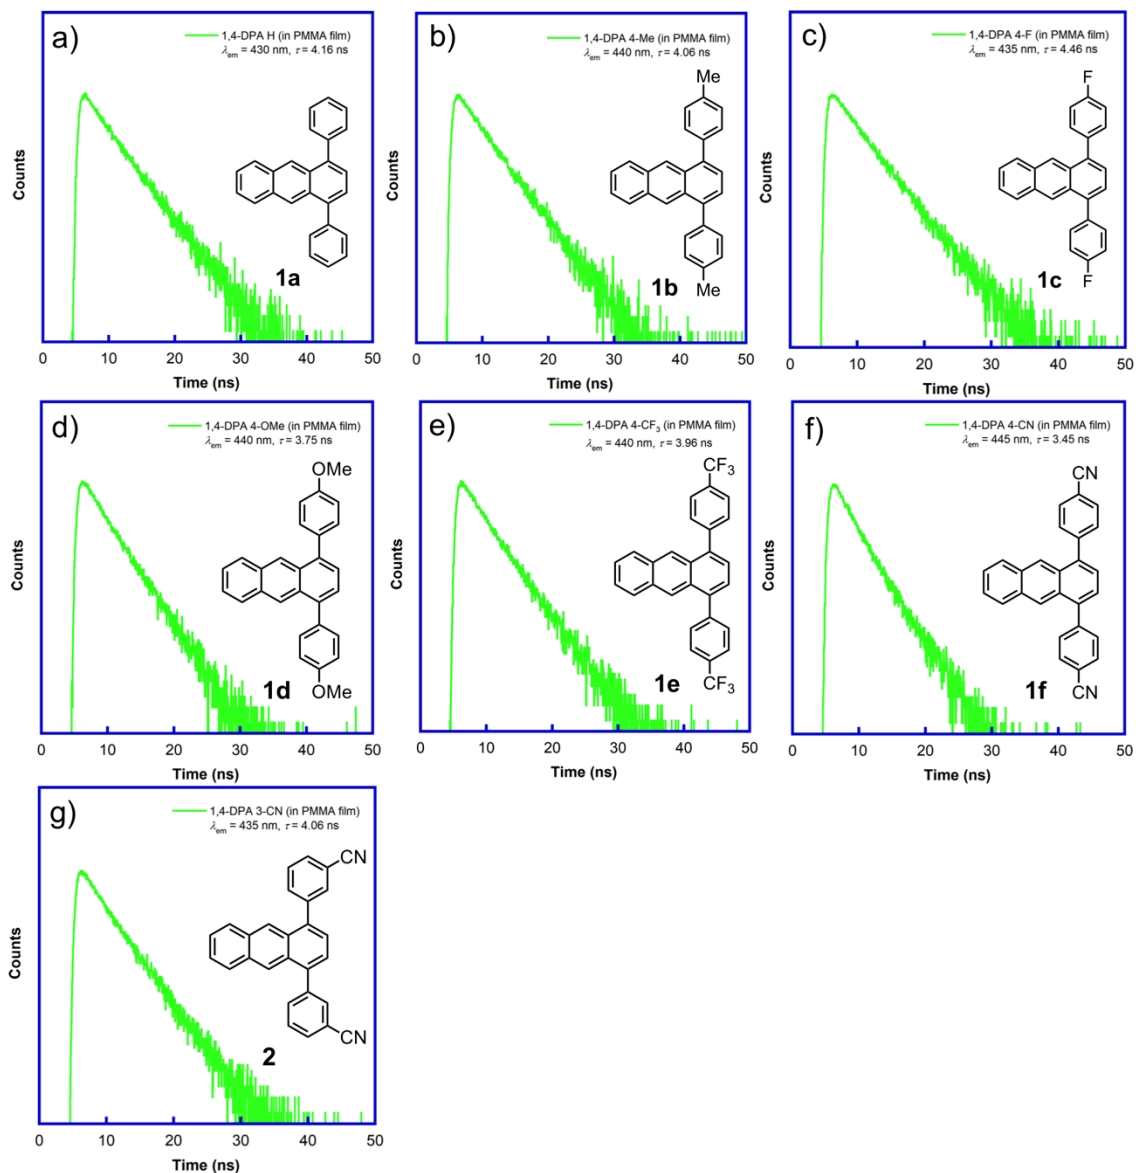

**Figure S22.** Fluorescence lifetime decay profiles of 1,4-diphenylanthracene derivatives in PMMA film (1 wt%,  $\lambda_{\text{ex}} = 365$  nm): a) **1a** (R=H), b) **1b** (R=Me), c) **1c** (R=F), d) **1d** (R=OMe), e) **1e** (R=CF<sub>3</sub>), f) **1f** (R=CN), g) **2** (3-CN).

## 1.15 Photophysical properties of 1,4-diphenylanthracene derivatives

**Table S1.** Photophysical properties of 1,4-diphenylanthracene derivatives

| compds.                         | $\phi_f^a$         |                   | $\tau^b$ / ns      |                   | $k_f$ / ns <sup>-1</sup> |                   | $k_{nr}$ / ns <sup>-1</sup> |                   |
|---------------------------------|--------------------|-------------------|--------------------|-------------------|--------------------------|-------------------|-----------------------------|-------------------|
|                                 | soln. <sup>c</sup> | pristine (ground) | soln. <sup>c</sup> | pristine (ground) | soln.                    | pristine (ground) | soln.                       | pristine (ground) |
| <b>1a</b> (R=H)                 | 0.47               | 0.20<br>(0.23)    | 3.02               | 2.27<br>(6.48)    | 0.156                    | 0.088<br>(0.035)  | 0.175                       | 0.352<br>(0.119)  |
| <b>1b</b> (R=Me)                | 0.49               | 0.31<br>(0.21)    | 3.08               | 3.96<br>(13.4)    | 0.159                    | 0.078<br>(0.016)  | 0.166                       | 0.174<br>(0.059)  |
| <b>1c</b> (R=F)                 | 0.49               | 0.24<br>(0.25)    | 3.36               | 3.05<br>(13.7)    | 0.146                    | 0.079<br>(0.018)  | 0.152                       | 0.249<br>(0.055)  |
| <b>1d</b> (R=OMe)               | 0.40               | 0.15<br>(0.18)    | 2.69               | 12.4<br>(10.4)    | 0.149                    | 0.012<br>(0.017)  | 0.223                       | 0.069<br>(0.079)  |
| <b>1e</b> (R=CF <sub>3</sub> )  | 0.51               | 0.37<br>(0.33)    | 2.76               | 4.69<br>(7.63)    | 0.185                    | 0.079<br>(0.043)  | 0.178                       | 0.134<br>(0.088)  |
| <b>1f</b> (R=CN)                | 0.55               | 0.26<br>(0.33)    | 2.57               | 32.8<br>(18.4)    | 0.214                    | 0.008<br>(0.018)  | 0.175                       | 0.023<br>(0.036)  |
| <b>2</b> (3-CN)                 | 0.46               | 0.71<br>(0.37)    | 2.85               | 109<br>(91.5)     | 0.161                    | 0.007<br>(0.004)  | 0.189                       | 0.003<br>(0.007)  |
| <b>3</b> (3,5-CN <sub>2</sub> ) | 0.41               | 0.15<br>(0.05)    | 2.57               | 7.39<br>(4.09)    | 0.160                    | 0.020<br>(0.012)  | 0.230                       | 0.115<br>(0.232)  |
| <b>4</b> (3,5-F <sub>2</sub> )  | 0.50               | 0.44<br>(0.22)    | 2.90               | 5.22<br>(5.36)    | 0.172                    | 0.084<br>(0.041)  | 0.172                       | 0.107<br>(0.146)  |

<sup>a</sup> Fluorescence quantum yield determined by a calibrated integrating sphere, <sup>b</sup> Averaged fluorescence lifetimes, <sup>c</sup> CHCl<sub>3</sub> solution (10  $\mu$ M) after Ar bubbling.

**Table S2.** Photophysical properties of 1,4-diphenylanthracene derivatives in PMMA film

| PMMA films                     | $\lambda_{\max}/\text{nm}^a$<br>Luminous color <sup>b</sup> | $\phi_f^c$ | $\tau^d$ / ns | $k_f^e$ / ns <sup>-1</sup> | $k_{nr}^f$ / ns <sup>-1</sup> |
|--------------------------------|-------------------------------------------------------------|------------|---------------|----------------------------|-------------------------------|
| <b>1a</b> (R=H)                | 437 B                                                       | 0.64       | 4.16          | 0.154                      | 0.087                         |
| <b>1b</b> (R=Me)               | 443 B                                                       | 0.66       | 4.06          | 0.163                      | 0.084                         |
| <b>1c</b> (R=F)                | 438 B                                                       | 0.63       | 4.42          | 0.143                      | 0.084                         |
| <b>1d</b> (R=OMe)              | 445 B                                                       | 0.67       | 3.75          | 0.179                      | 0.088                         |
| <b>1e</b> (R=CF <sub>3</sub> ) | 441 B                                                       | 0.64       | 3.96          | 0.162                      | 0.091                         |
| <b>1f</b> (R=CN)               | 448 LB                                                      | 0.71       | 3.45          | 0.206                      | 0.084                         |
| <b>2</b> (3-CN)                | 436 B                                                       | 0.62       | 4.06          | 0.153                      | 0.094                         |

<sup>a</sup>Solid-state (1wt% in PMMA film) emission ( $\lambda_{\text{ex}}$ =365 nm), <sup>b</sup>Luminous color under 365 nm UV irradiation, B: blue, LB: light blue, <sup>c</sup>Fluorescence quantum yield determined by a calibrated integrating sphere at  $\lambda_{\text{ex}}$ =365 nm, <sup>d</sup>Averaged fluorescence lifetime at  $\lambda_{\text{ex}}$ =365 nm, <sup>e</sup>Rate constant for fluorescence, <sup>f</sup>Rate constant for nonradiative decay.

## 2. X-ray analysis of 1,4-diphenylanthracene derivatives

### 2.1. Single crystal X-ray analysis

**Table S3.** Crystallographic data for **1a-1d**

| Compounds                                          | <b>1a</b> (R=H)                                       | <b>1b</b> (R=Me)                                      | <b>1c</b> (R=F)                                | <b>1d</b> (R=OMe)                                     |
|----------------------------------------------------|-------------------------------------------------------|-------------------------------------------------------|------------------------------------------------|-------------------------------------------------------|
| Chemical formula                                   | C <sub>26</sub> H <sub>18</sub>                       | C <sub>28</sub> H <sub>22</sub>                       | C <sub>26</sub> H <sub>16</sub> F <sub>2</sub> | C <sub>28</sub> H <sub>22</sub> O <sub>2</sub>        |
| Temperature /K                                     | 293                                                   | 100                                                   | 100                                            | 100                                                   |
| Crystal system                                     | orthorhombic                                          | orthorhombic                                          | triclinic                                      | orthorhombic                                          |
| Space group                                        | <i>P</i> 2 <sub>1</sub> 2 <sub>1</sub> 2 <sub>1</sub> | <i>P</i> 2 <sub>1</sub> 2 <sub>1</sub> 2 <sub>1</sub> | <i>P</i> -1                                    | <i>P</i> 2 <sub>1</sub> 2 <sub>1</sub> 2 <sub>1</sub> |
| <i>a</i> /Å                                        | 5.8982(11)                                            | 5.9154(2)                                             | 5.8772(2)                                      | 5.9797(3)                                             |
| <i>b</i> /Å                                        | 14.477(4)                                             | 13.6349(3)                                            | 11.5283(6)                                     | 13.9553(7)                                            |
| <i>c</i> /Å                                        | 20.400(4)                                             | 23.8451(6)                                            | 14.1198(7)                                     | 23.2841(10)                                           |
| $\alpha$ /°                                        |                                                       |                                                       | 113.856(2)                                     |                                                       |
| $\beta$ /°                                         |                                                       |                                                       | 95.664(2)                                      |                                                       |
| $\gamma$ /°                                        |                                                       |                                                       | 90.875(2)                                      |                                                       |
| <i>V</i> /Å <sup>3</sup>                           | 1741.9(7)                                             | 1923.25(9)                                            | 869.07(7)                                      | 1943.02(16)                                           |
| <i>Z</i>                                           | 4                                                     | 4                                                     | 2                                              | 4                                                     |
| Radiation type                                     | MoK $\alpha$                                          | MoK $\alpha$                                          | MoK $\alpha$                                   | MoK $\alpha$                                          |
| <i>D</i> <sub>calcd.</sub> /Mgm <sup>-3</sup>      | 1.260                                                 | 1.238                                                 | 1.400                                          | 1.335                                                 |
| Collected reflections                              | 5485                                                  | 19998                                                 | 11351                                          | 23611                                                 |
| Unique reflections                                 | 3191                                                  | 3916                                                  | 3032                                           | 3959                                                  |
| <i>R</i> <sub>int</sub>                            | 0.0488                                                | 0.0485                                                | 0.0369                                         | 0.0794                                                |
| <i>R</i> <sub>I</sub> ( <i>I</i> > 2σ( <i>I</i> )) | 0.0712                                                | 0.0395                                                | 0.0393                                         | 0.0476                                                |
| <i>R</i> <sub>I</sub> (all data)                   | 0.1368                                                | 0.0425                                                | 0.0452                                         | 0.0585                                                |
| <i>R</i> <sub>w</sub> (all data)                   | 0.2276                                                | 0.1045                                                | 0.1067                                         | 0.1186                                                |
| Goodness-of fit                                    | 1.007                                                 | 1.018                                                 | 1.029                                          | 1.046                                                 |

**Table S4.** Crystallographic data for **1f** and **2**

| Compounds                                                 | <b>1f</b> (R=CN)                               | <b>2</b> (3-CN)                                |
|-----------------------------------------------------------|------------------------------------------------|------------------------------------------------|
| Chemical formula                                          | C <sub>28</sub> H <sub>16</sub> N <sub>2</sub> | C <sub>28</sub> H <sub>16</sub> N <sub>2</sub> |
| Temperature /K                                            | 100                                            | 293                                            |
| Crystal system                                            | triclinic                                      | triclinic                                      |
| Space group                                               | <i>P</i> -1                                    | <i>P</i> -1                                    |
| <i>a</i> /Å                                               | 11.0734(2)                                     | 8.2867(7)                                      |
| <i>b</i> /Å                                               | 12.9373(2)                                     | 10.2528(8)                                     |
| <i>c</i> /Å                                               | 14.2271(2)                                     | 12.4967(11)                                    |
| $\alpha$ /°                                               | 80.5840(10)                                    | 75.726(7)                                      |
| $\beta$ /°                                                | 86.7280(10)                                    | 78.035(7)                                      |
| $\gamma$ /°                                               | 75.6040(10)                                    | 82.179(7)                                      |
| <i>V</i> /Å <sup>3</sup>                                  | 1974.29(5)                                     | 1002.56(15)                                    |
| <i>Z</i>                                                  | 4                                              | 2                                              |
| Radiation type                                            | CuK $\alpha$                                   | MoK $\alpha$                                   |
| <i>D</i> <sub>calcd.</sub> /Mgm <sup>-3</sup>             | 1.298                                          | 1.260                                          |
| Collected reflections                                     | 18220                                          | 6102                                           |
| Unique reflections                                        | 6871                                           | 4100                                           |
| <i>R</i> <sub>int</sub>                                   | 0.0513                                         | 0.0254                                         |
| <i>R</i> <sub><i>I</i></sub> ( <i>I</i> > 2σ( <i>I</i> )) | 0.0470                                         | 0.0579                                         |
| <i>R</i> <sub><i>I</i></sub> (all data)                   | 0.0633                                         | 0.1105                                         |
| <i>R</i> <sub><i>w</i></sub> (all data)                   | 0.1327                                         | 0.1691                                         |
| Goodness-of fit                                           | 1.016                                          | 1.031                                          |

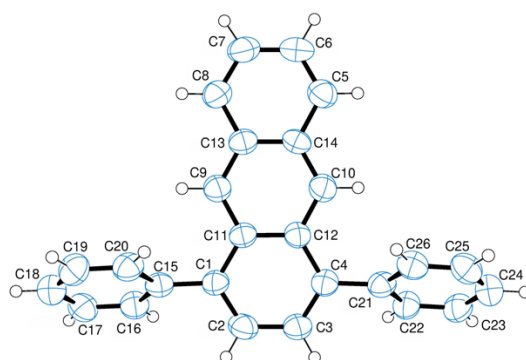

**Figure S23.** ORTEP drawing of **1a** (R=H).

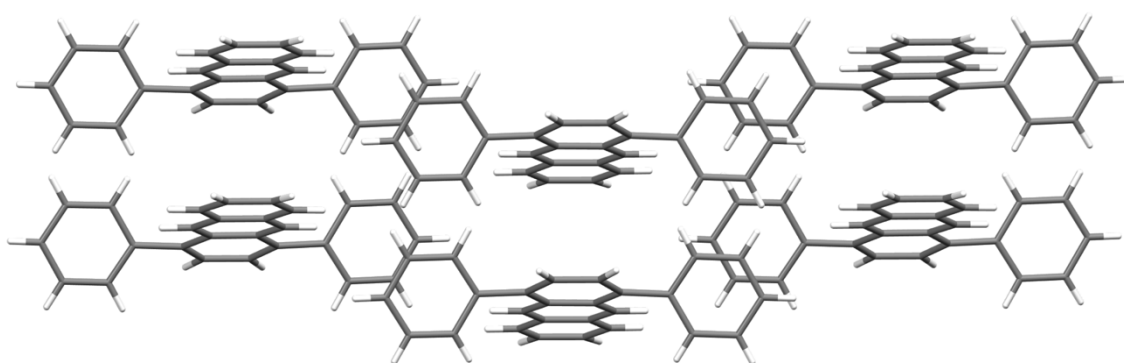

**Figure S24.** Crystal packing of **1a** (R=H).

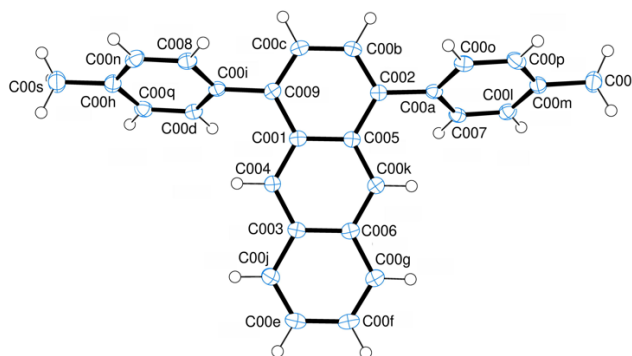

**Figure S25.** ORTEP drawing of **1b** (R=Me).

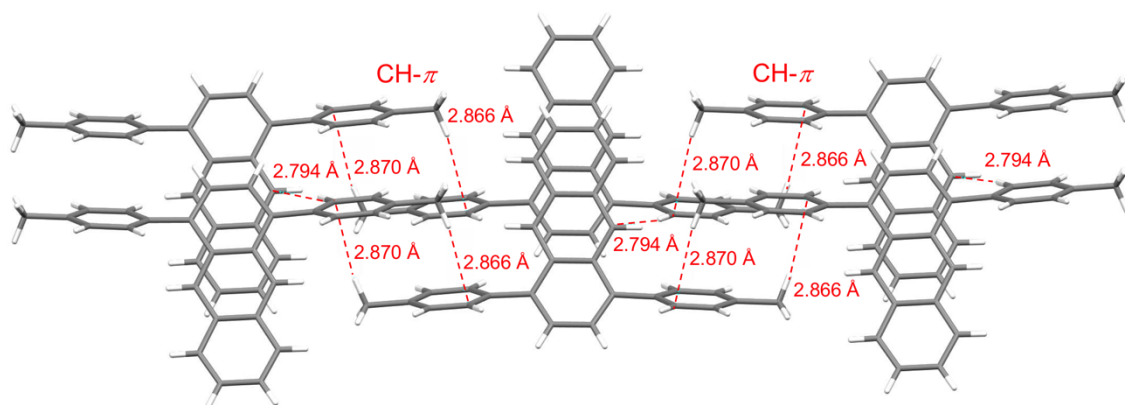

**Figure S26.** Crystal packing of **1b** (R=Me).

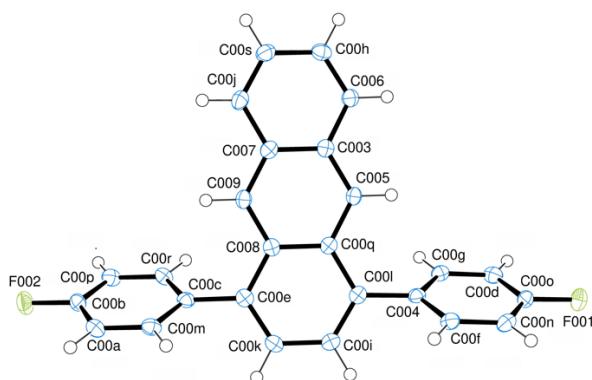

**Figure S27.** ORTEP drawing of **1c** (R=F).

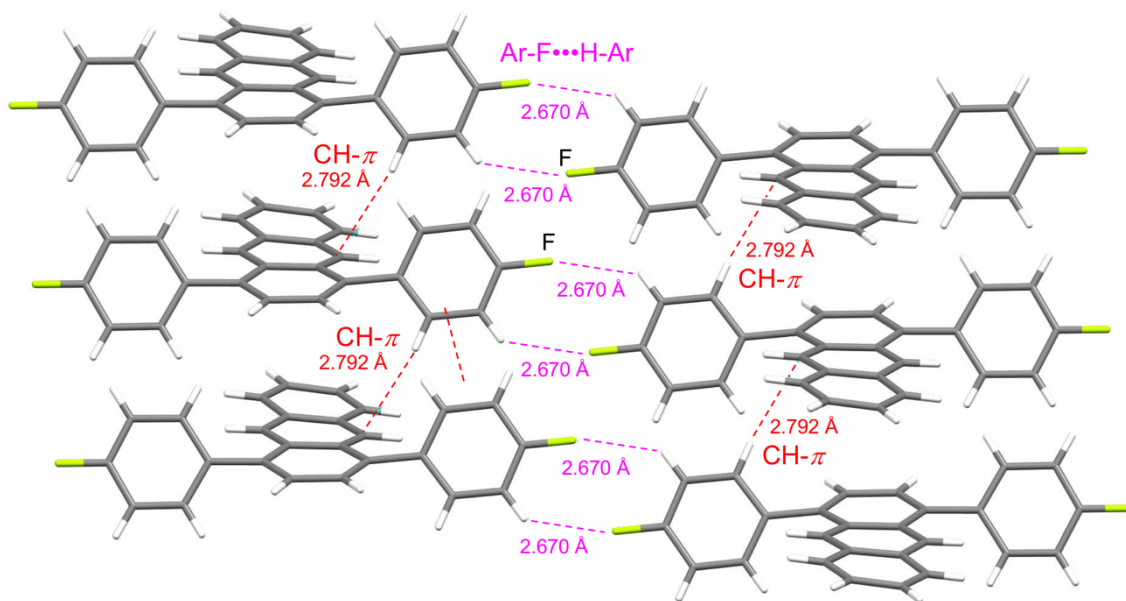

**Figure S28.** Crystal packing of **1c** (R=F).



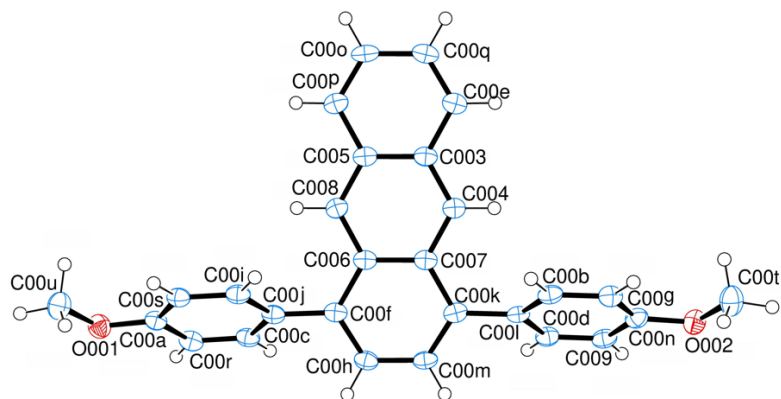

**Figure S29.** ORTEP drawing of **1d** (R=OMe).

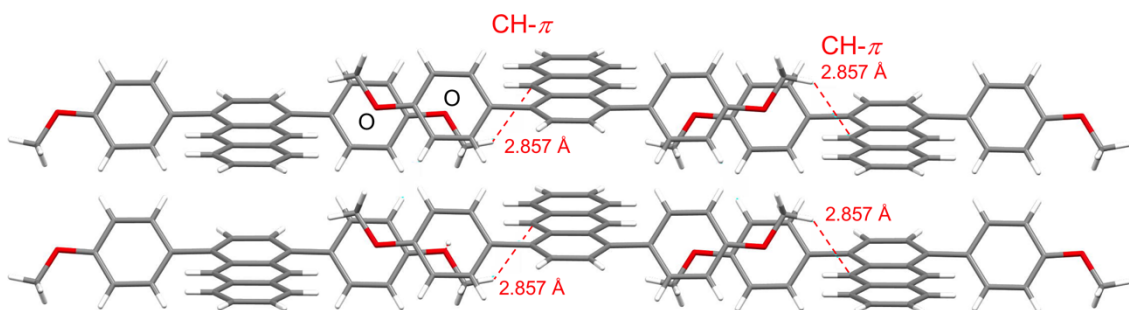

**Figure S30.** Crystal packing of **1d** (R=OMe).

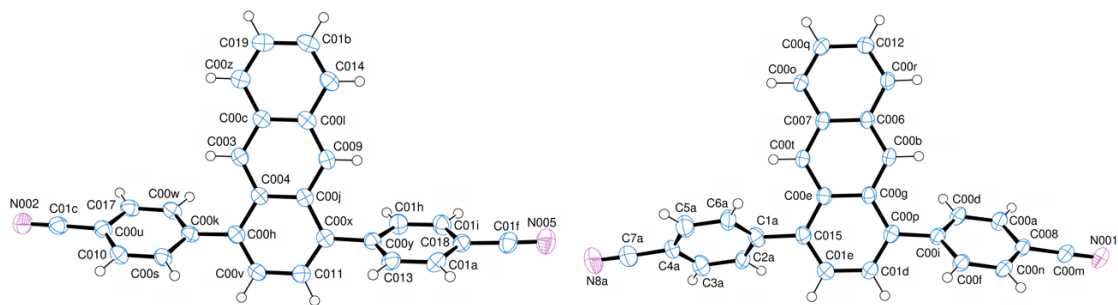

**Figure S31.** ORTEP drawing of **1f** (R=CN).

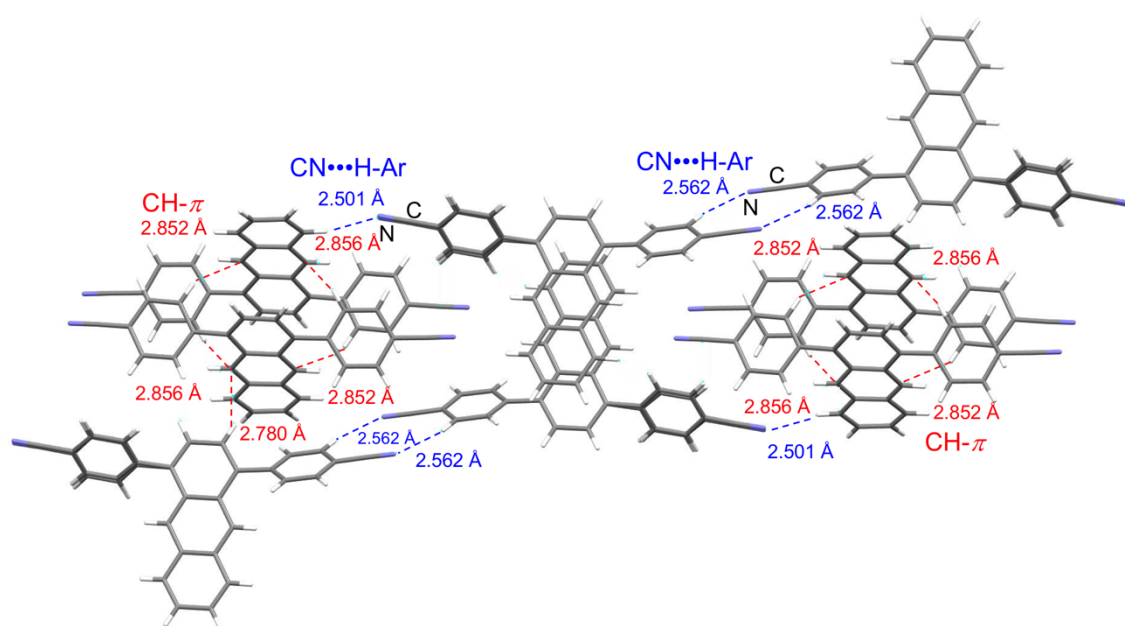

**Figure S32.** Crystal packing of **1f** (R=CN).

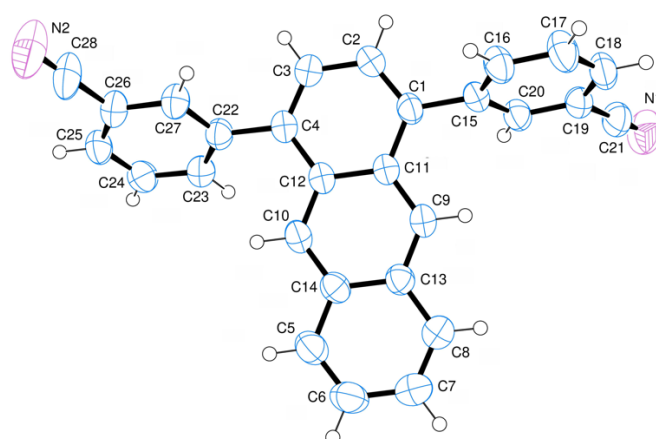

**Figure S33.** ORTEP drawing of **2** (3-CN).

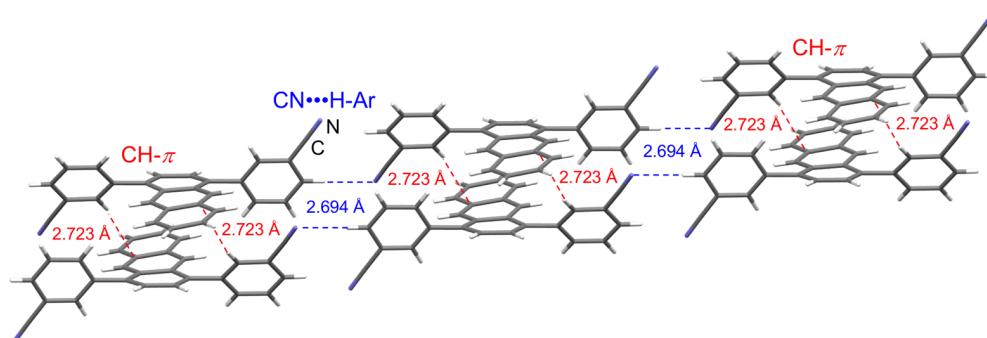

**Figure S34.** Crystal packing of **2** (3-CN).

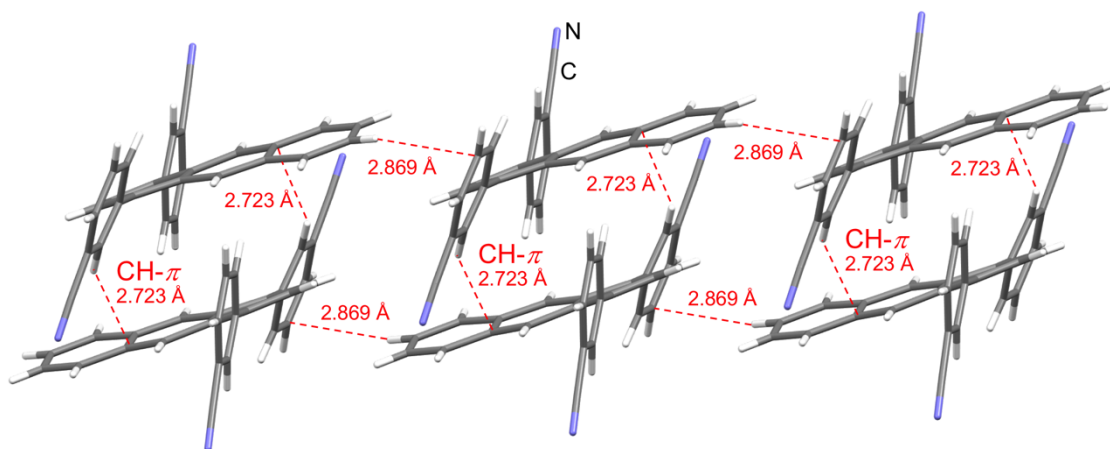

**Figure S35.** Crystal packing of **2** (3-CN).

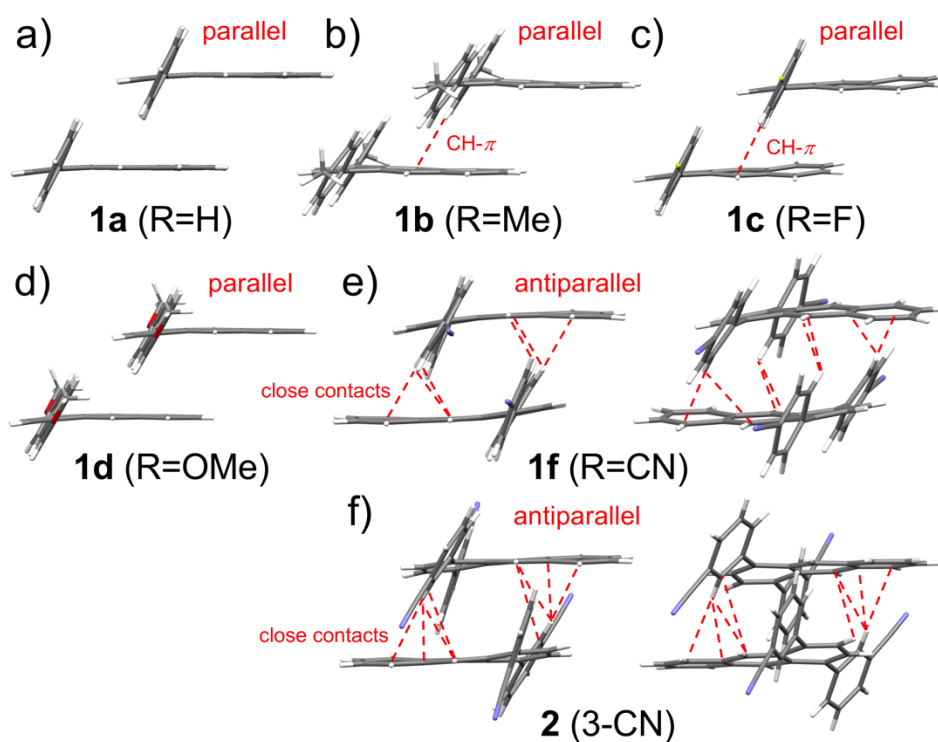

**Figure S36.** Crystal packing of 1,4-diphenylanthracene derivatives showing bimolecular interactions, a) **1a** (R=H), b) **1b** (R=Me), c) **1c** (R=F), d) **1d** (R=OMe), e) **1f** (R=CN), f) **2** (3-CN).

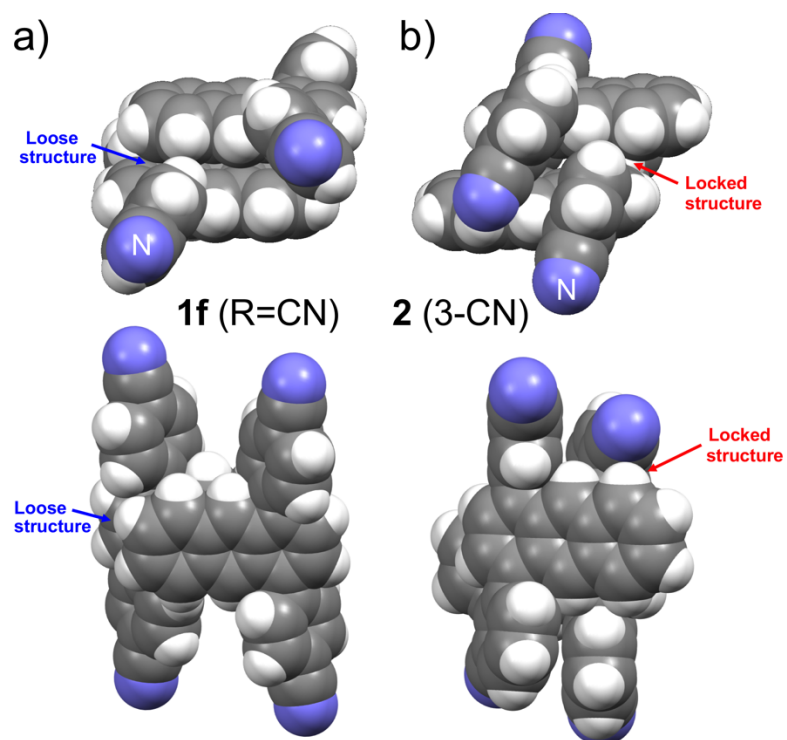

**Figure S37.** Crystal packing structure of 1,4-diphenylanthracene derivatives showing bimolecular interactions, a) **1f** (R=CN), b) **2** (3-CN).

**2.2. Powder X-ray diffraction (PXRD) pattern of 1,4-diphenylanthracene derivatives**

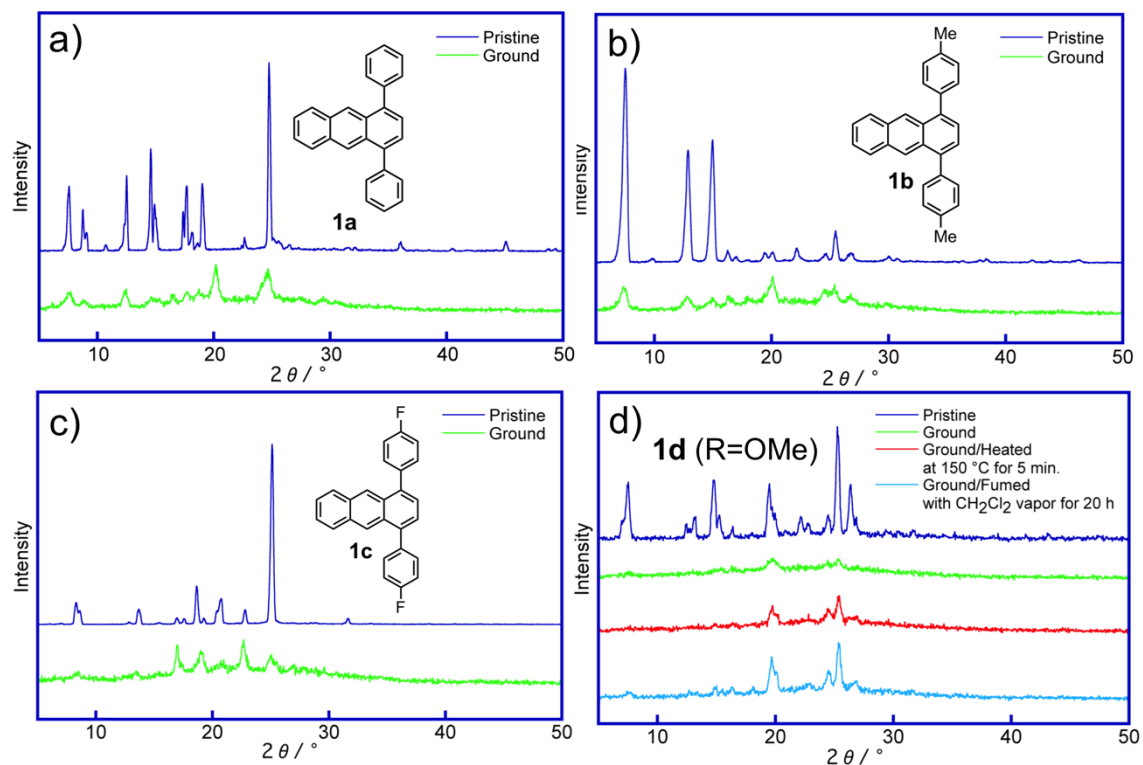

**Figure S38.** Powder X-ray diffraction (PXRD) patterns of 1,4-diphenylanthracene derivatives in pristine, ground, ground-fumed and ground-heated state, a) **1a** (R=H), b) **1b** (R=Me), c) **1c** (R=F), d) **1d** (R=OMe).

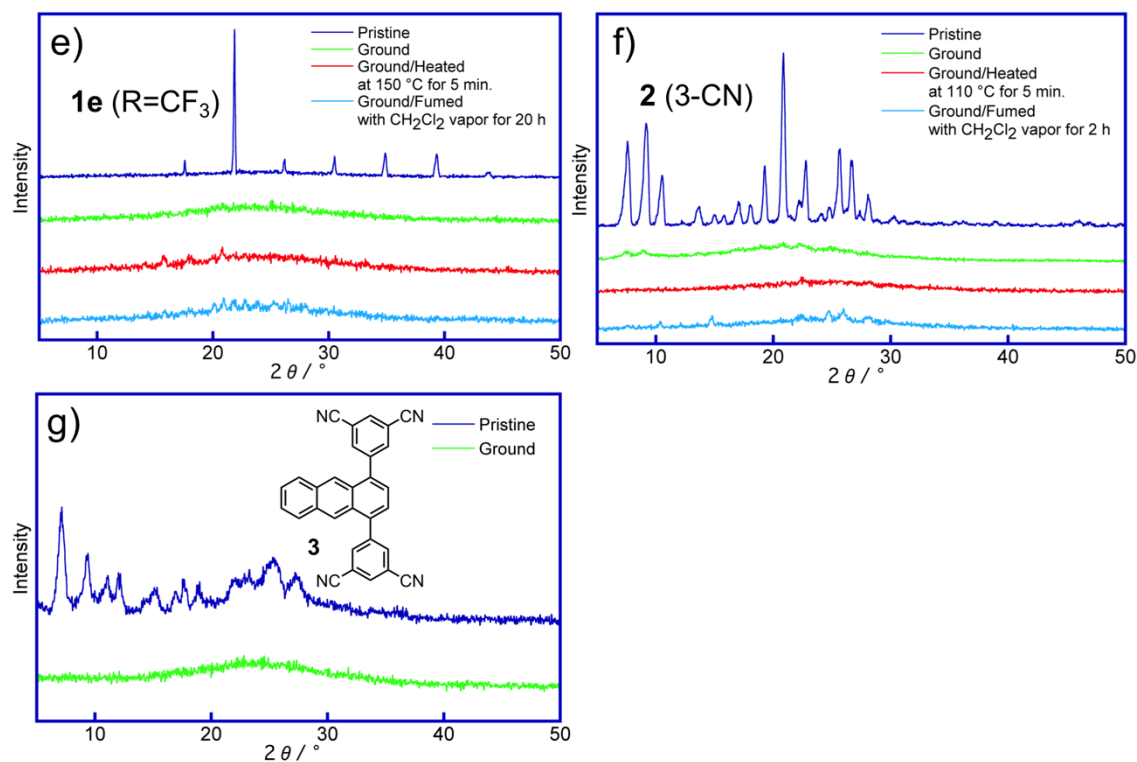

**Figure S38 (contd.).** Powder X-ray diffraction (PXRD) patterns of 1,4-diphenylanthracene derivatives in pristine, ground, ground-fumed and ground-heated state, e) **1e** (R= CF<sub>3</sub>), f) **2** (3-CN), g) **3** (3,5-CN<sub>2</sub>, R'=CN).

### 3. DFT calculation of the obtained crystal structures

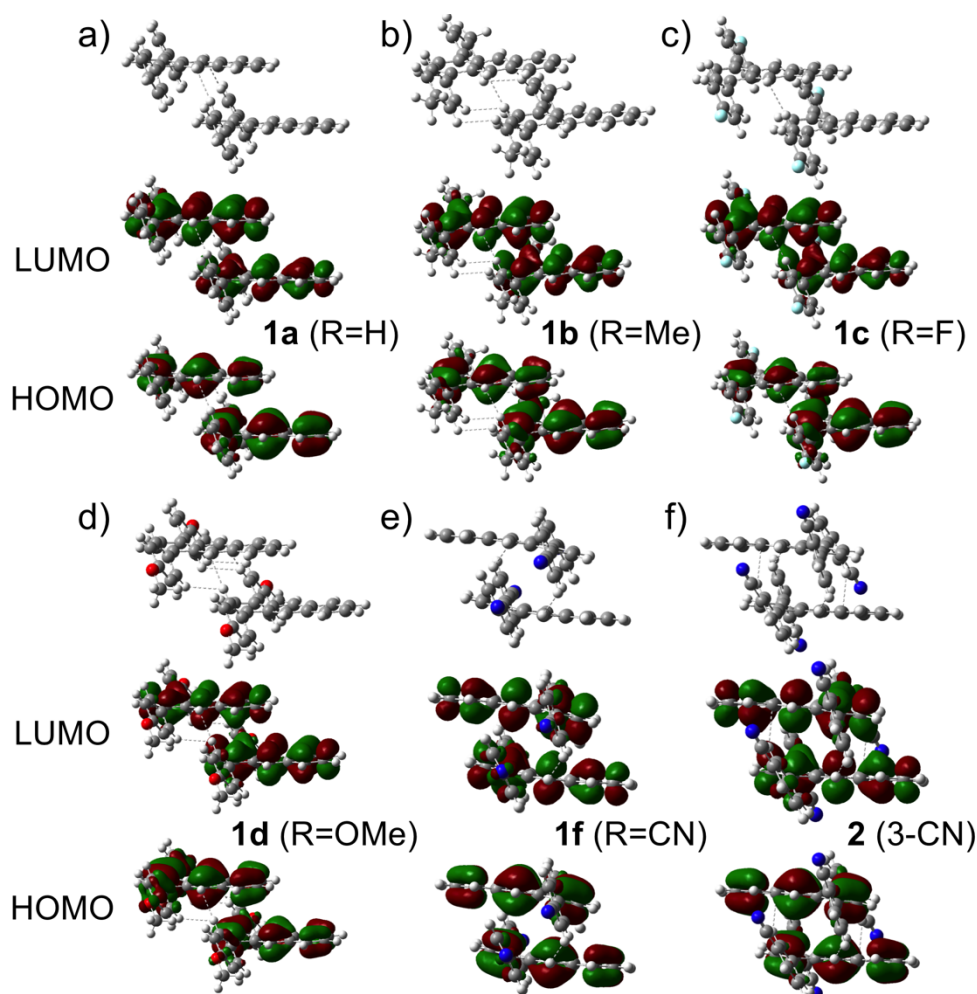

**Figure S39.** Electron cloud distribution of HOMO and LUMO from crystal structures (2 molecules) of 1,4-diphenylanthracene derivatives calculated by B3LYP-D3/6-31G\*, a) **1a** (R=H), b) **1b** (R=Me), c) **1c** (R=F), d) **1d** (R=OMe), e) **1f** (R=CN), f) **2** (3-CN).

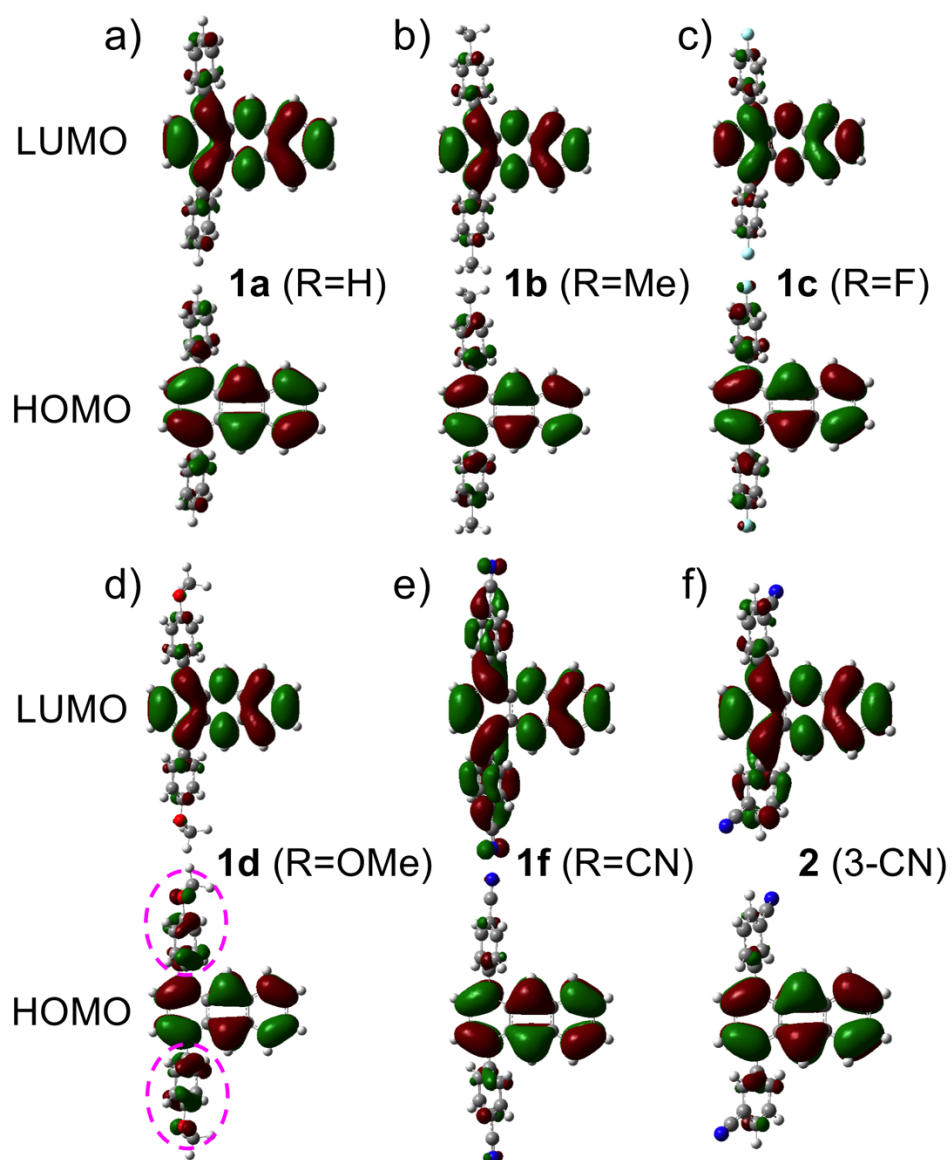

**Figure S40.** Electron cloud distribution of HOMO and LUMO from crystal structures (1 molecule) of 1,4-diphenylanthracene derivatives calculated by B3LYP-D3/6-31G\*, a) **1a** (R=H), b) **1b** (R=Me), c) **1c** (R=F), d) **1d** (R=OMe), e) **1f** (R=CN), f) **2** (3-CN).



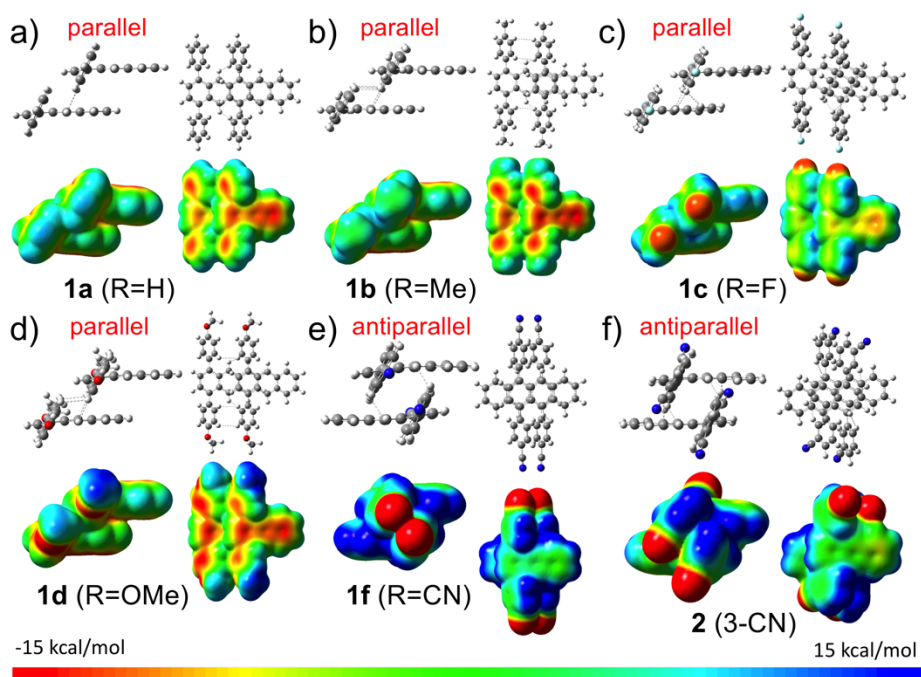

**Figure S41.** Electrostatic potential maps of 1,4-diphenylanthracene derivatives (bimolecular packing structures) calculated using B3LYP-D3/6-31G\* from the obtained crystal data, a) **1a** (R=H), b) **1b** (R=Me), c) **1c** (R=F), d) **1d** (R=OMe), e) **1f** (R=CN), f) **2** (3-CN).

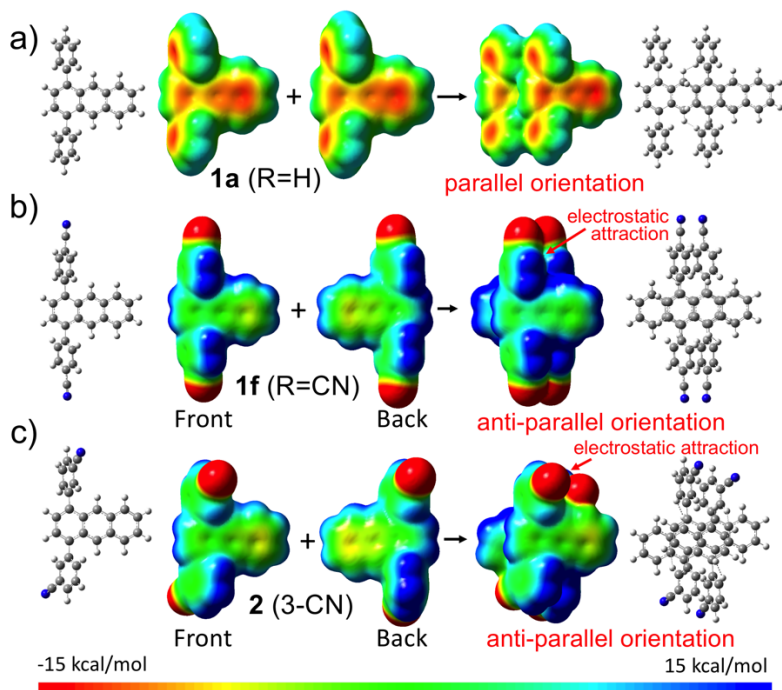

**Figure S42.** Schematic representation of the electrostatic potential maps for the bimolecular packing structure formation of 1,4-diphenylanthracene derivatives calculated using B3LYP-D3/6-31G\* from the obtained crystal data, a) **1a** (R=H), b) **1f** (R=CN), c) **2** (3-CN).

#### 4. UV irradiation experiments for 1,4-diphenylanthracene derivatives

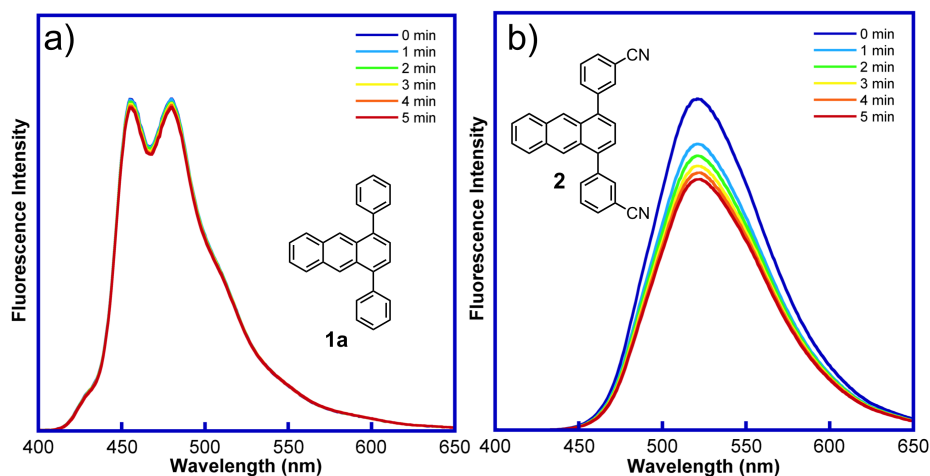

**Figure S43.** Fluorescence spectra of 1,4-diphenylanthracene derivatives after 365 nm UV irradiation in the solid state ( $\lambda_{\text{ex}} = 365$  nm), a) **1a** (R=H), b) **2** (3-CN).

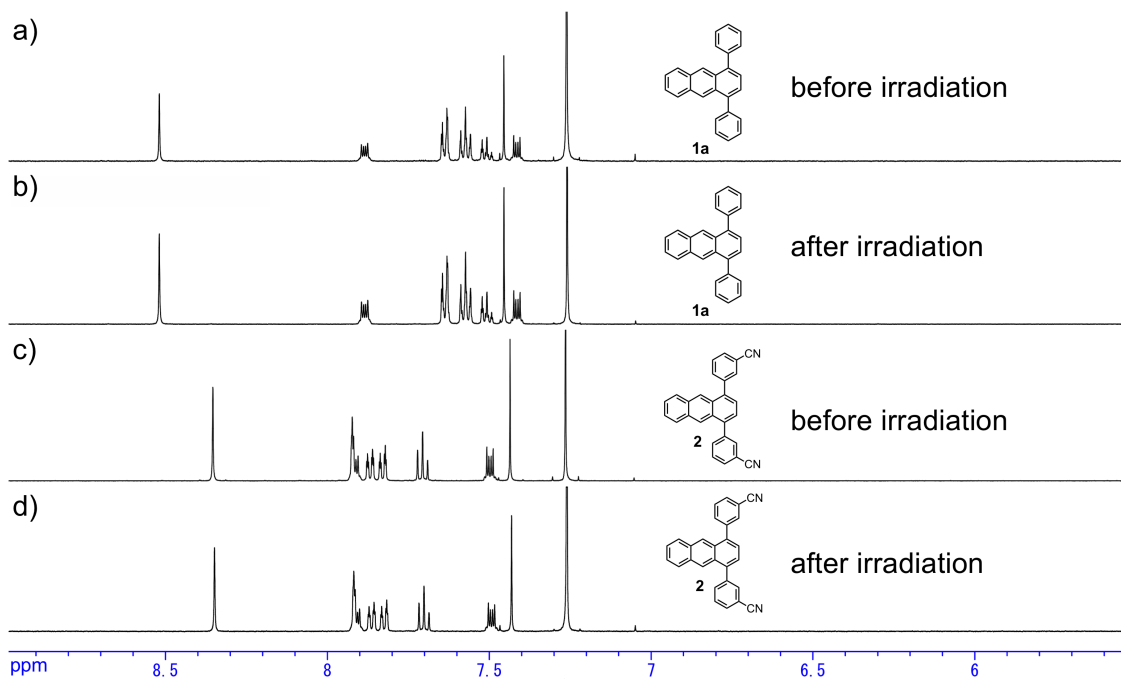

**Figure S44.**  $^1\text{H}$  NMR spectra ( $\text{CDCl}_3$ ) of 1,4-diphenylanthracene derivatives before and after 365 nm UV irradiation (5 min) in the solid state ( $\lambda_{\text{ex}} = 365$  nm), a) **1a** (R=H, before irradiation), b) **1a** (R=H, after irradiation of 365 nm UV light, 5 min), c) **2** (3-CN, before irradiation), d) **2** (3-CN, after irradiation of 365 nm UV light, 5 min).

## 5. NMR spectra of new compounds

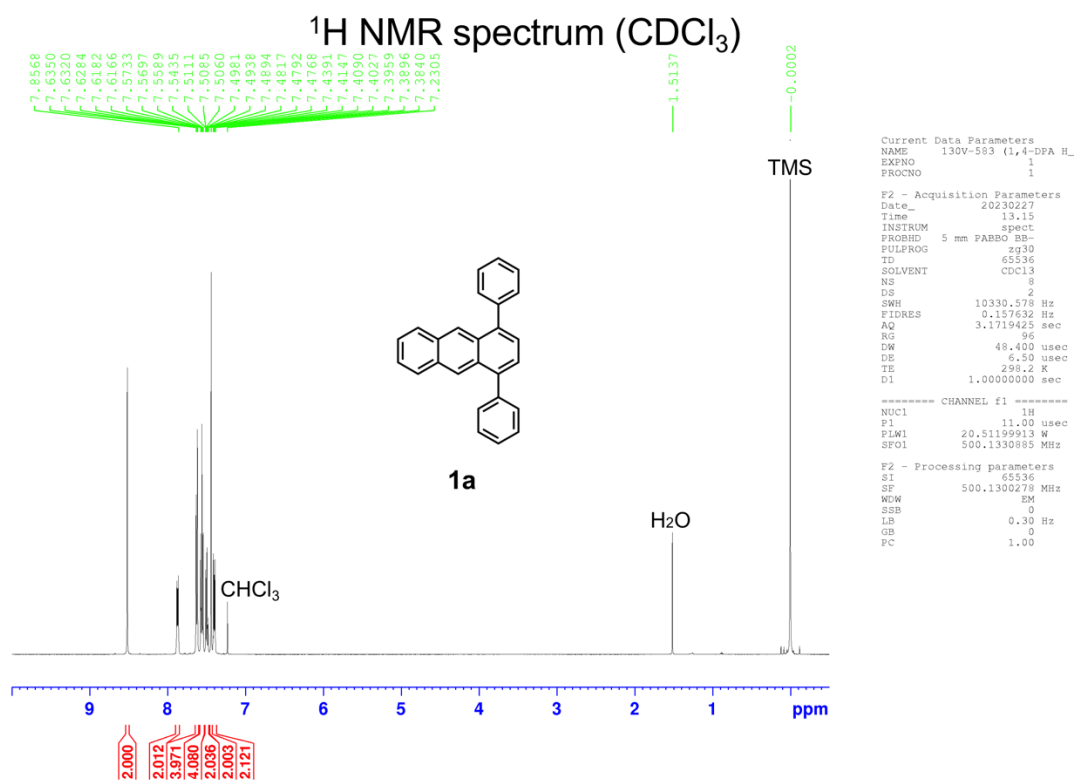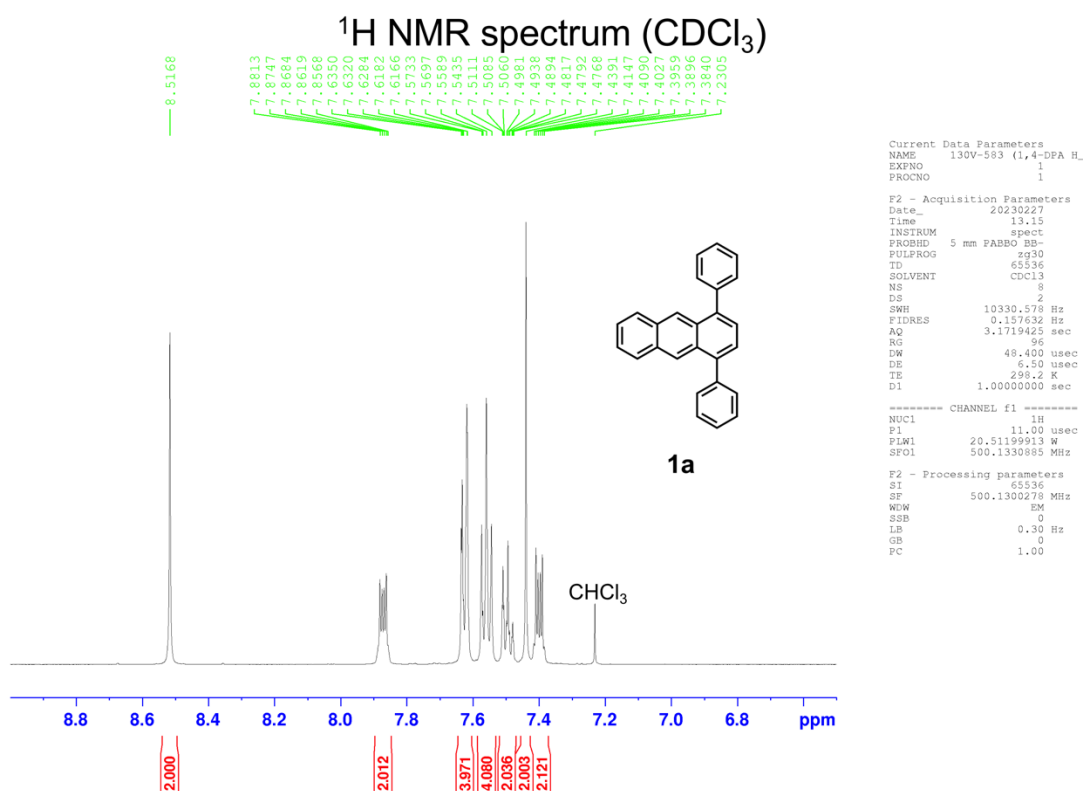

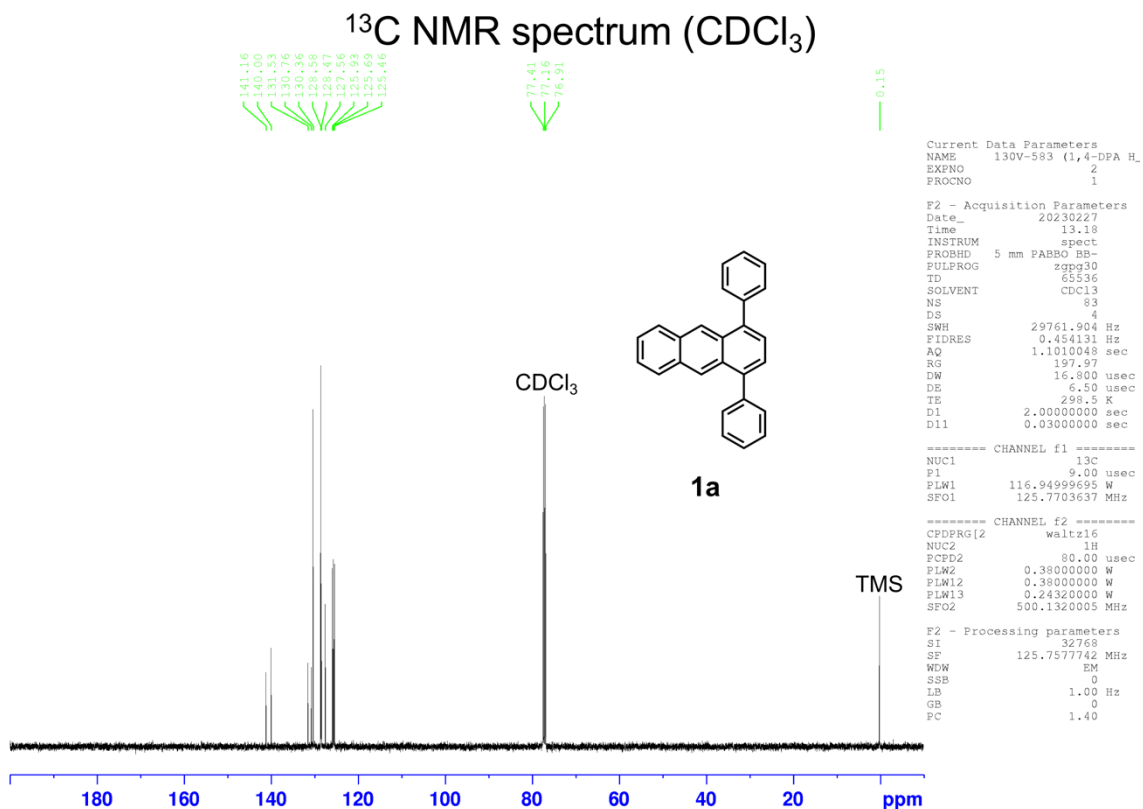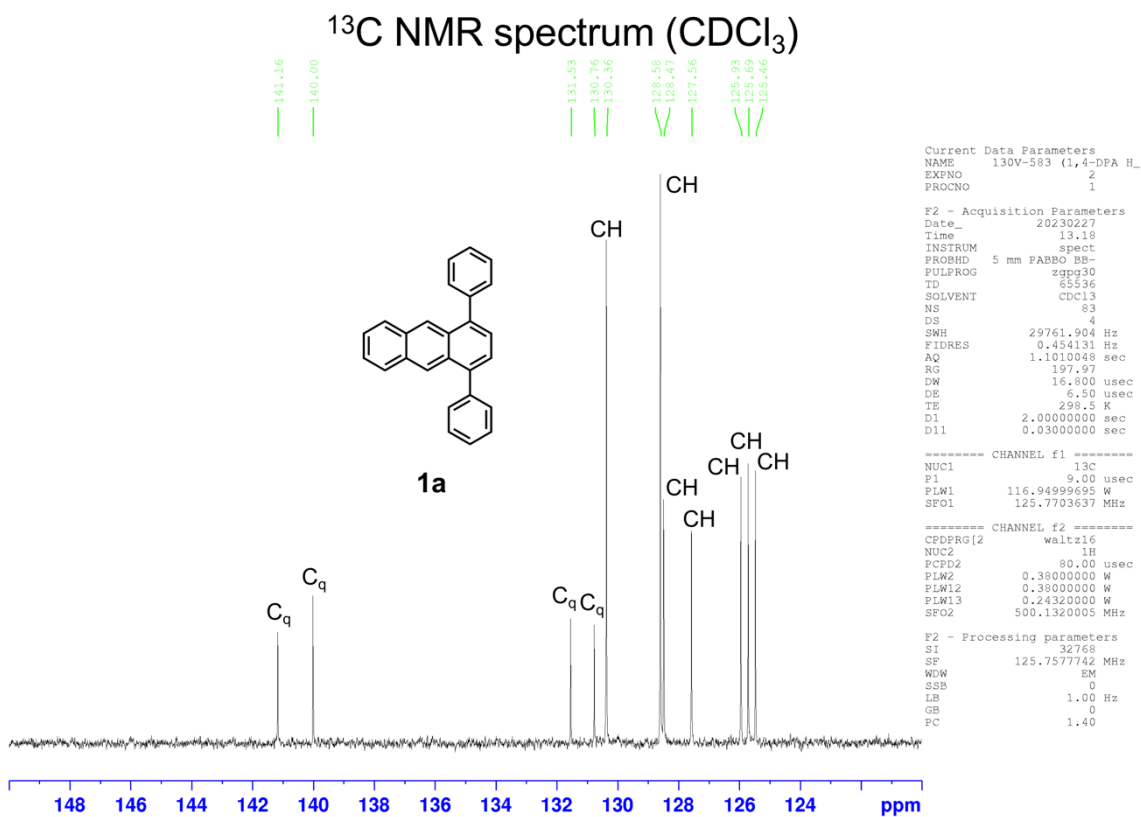

# DEPT 135 NMR spectrum (CDCl<sub>3</sub>)

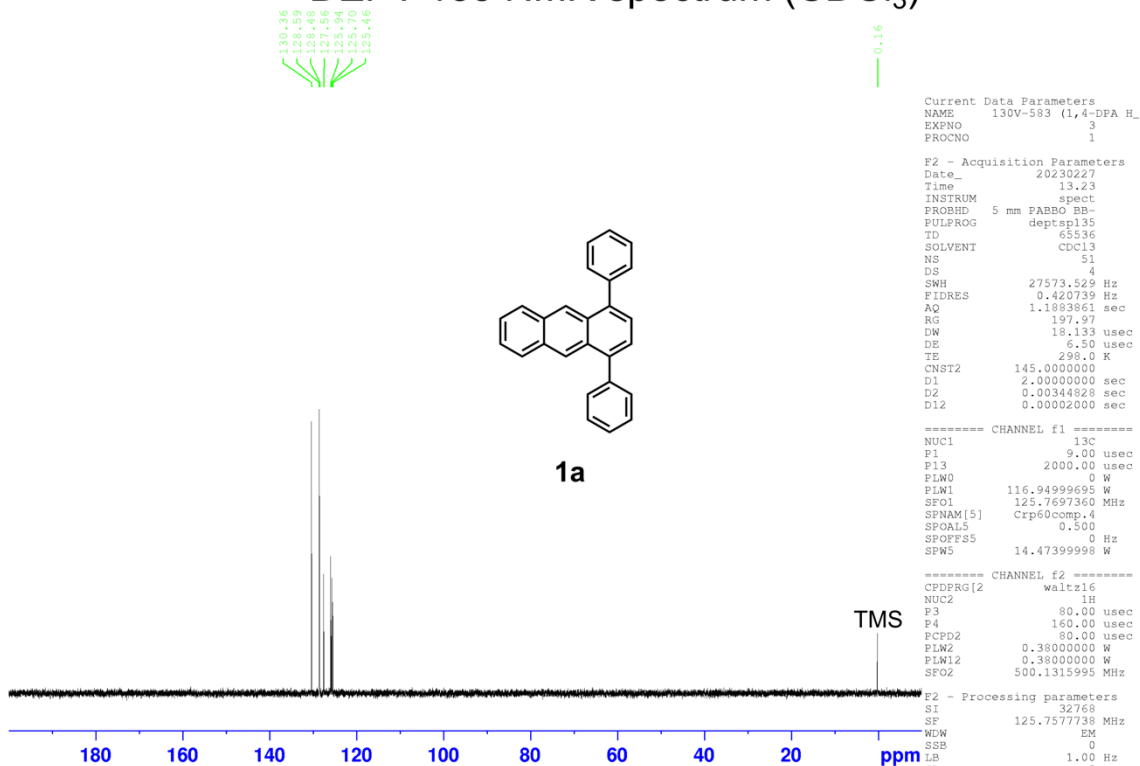

# DEPT 135 NMR spectrum (CDCl<sub>3</sub>)

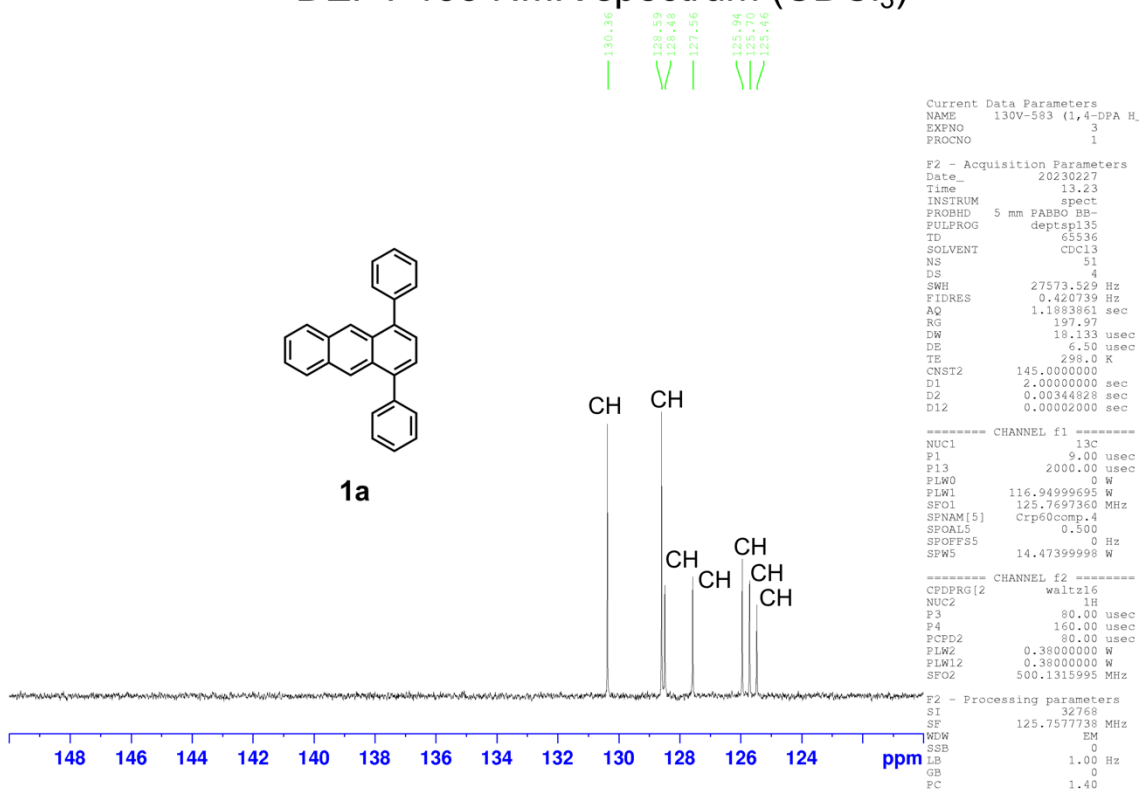

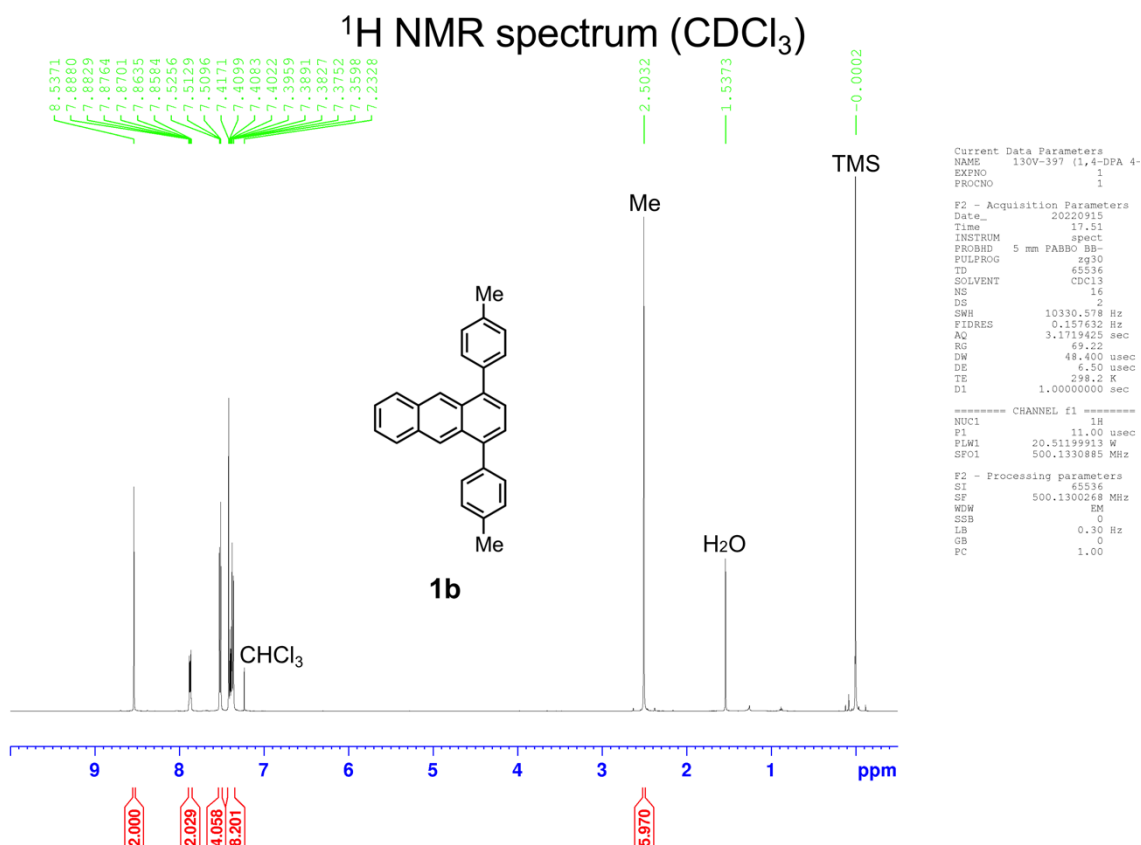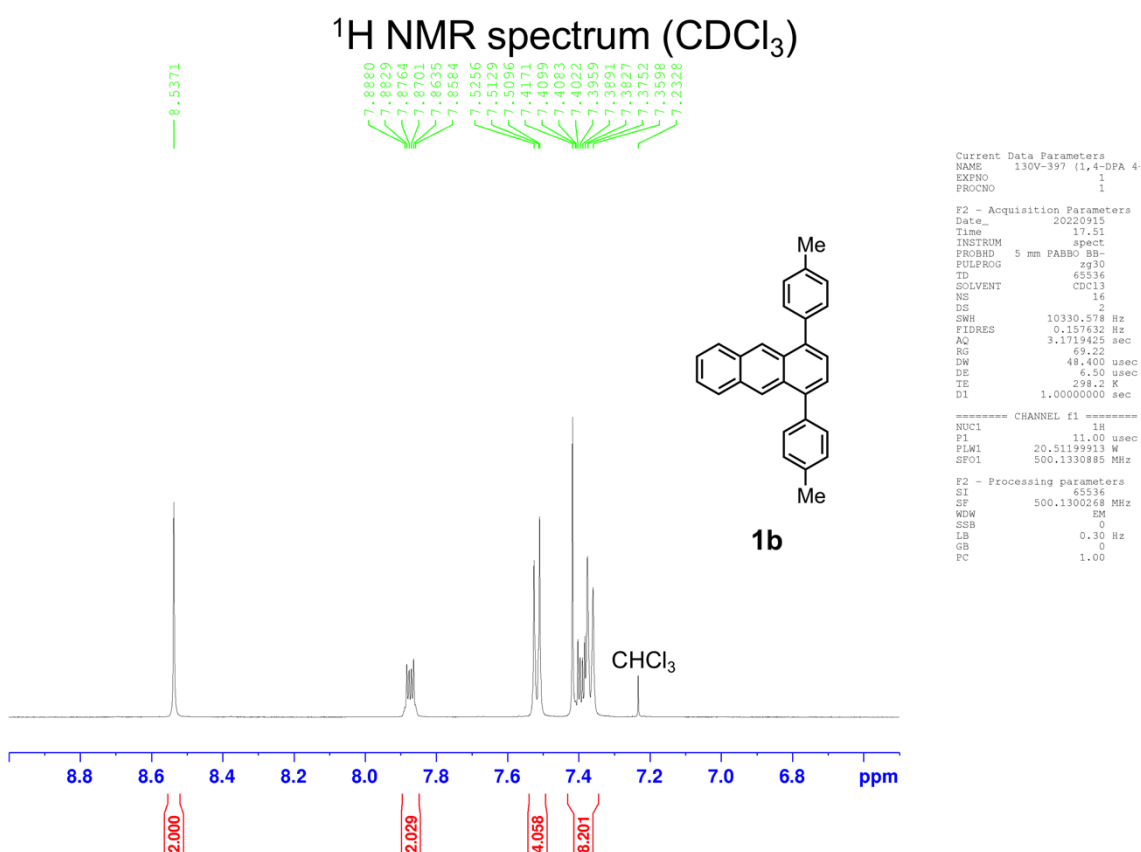

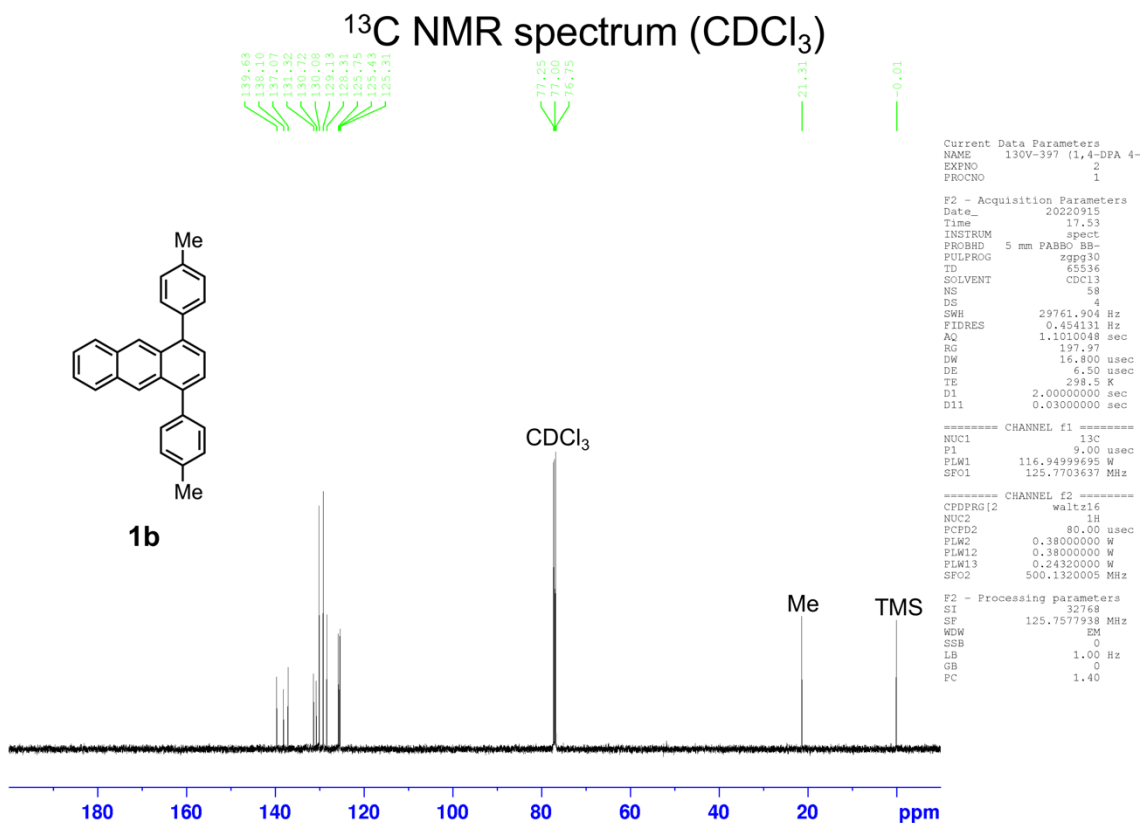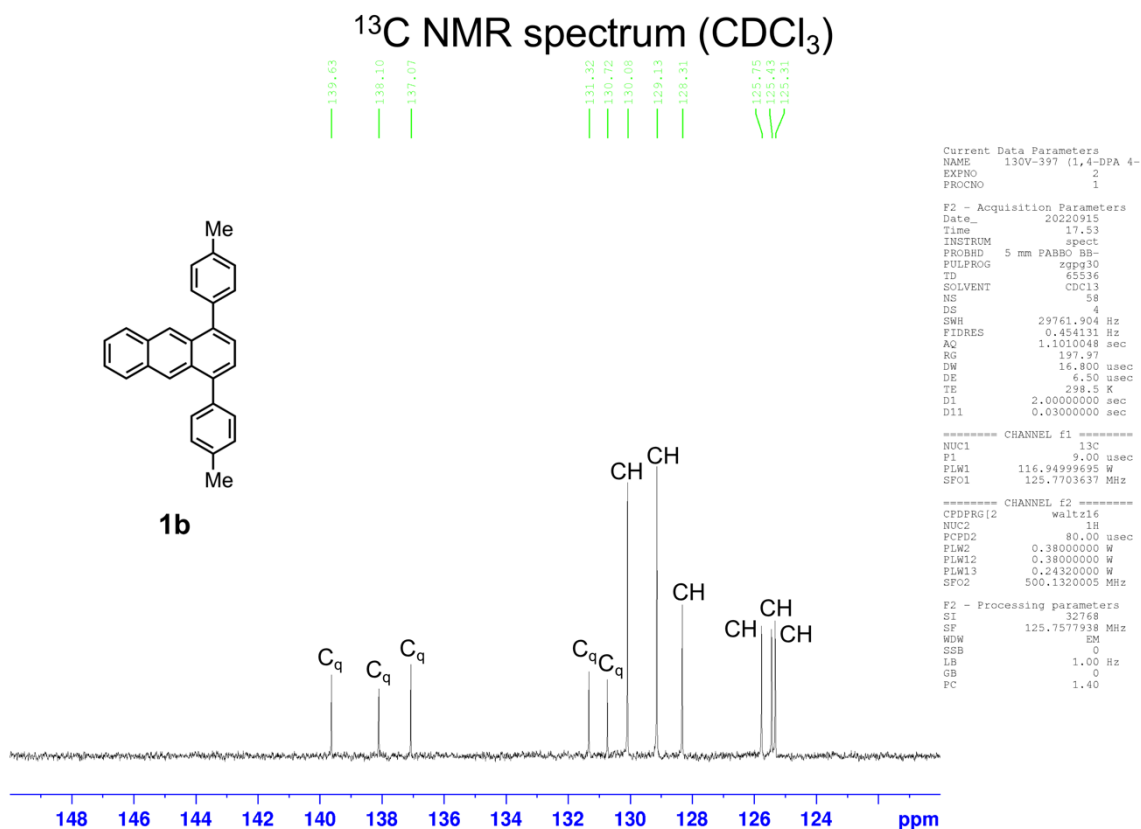

# DEPT 135 NMR spectrum (CDCl<sub>3</sub>)

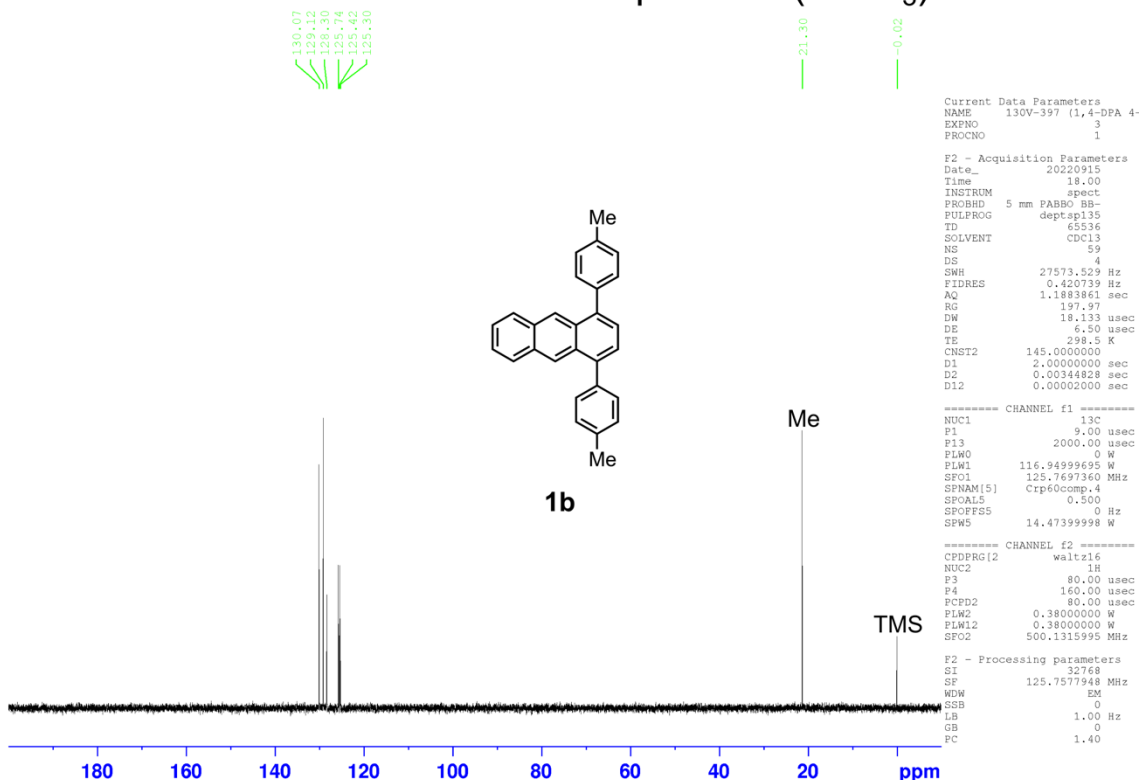

# DEPT 135 NMR spectrum (CDCl<sub>3</sub>)

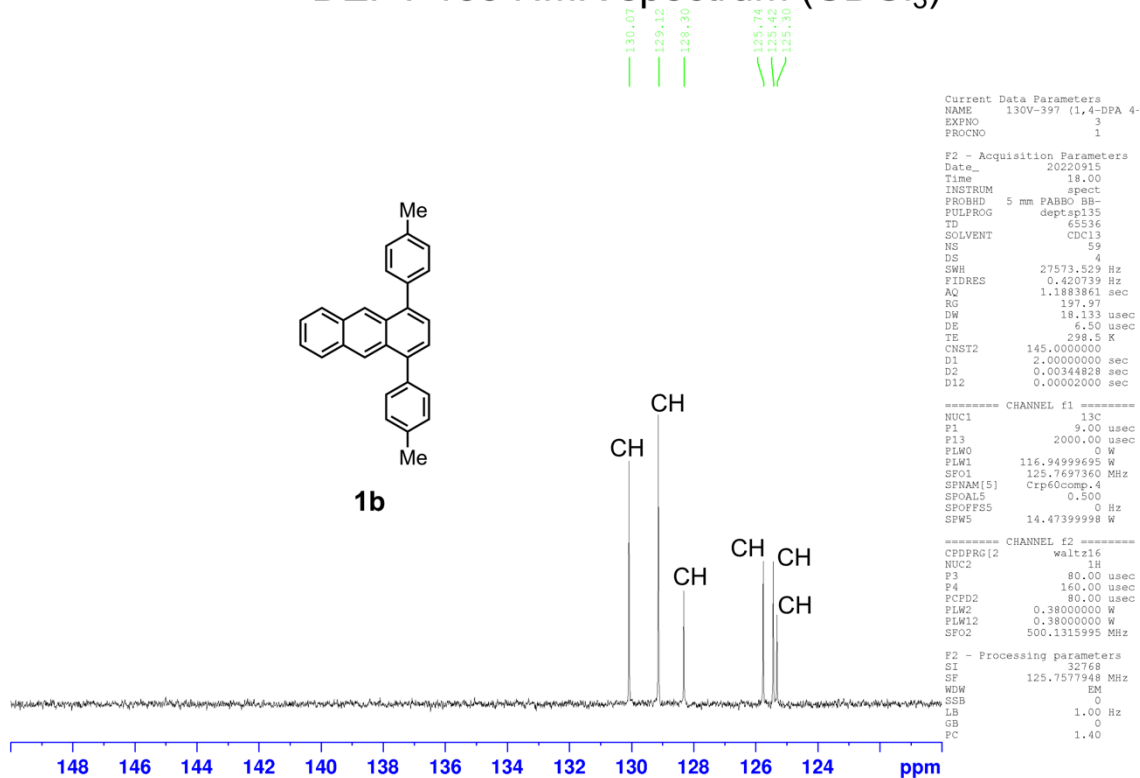



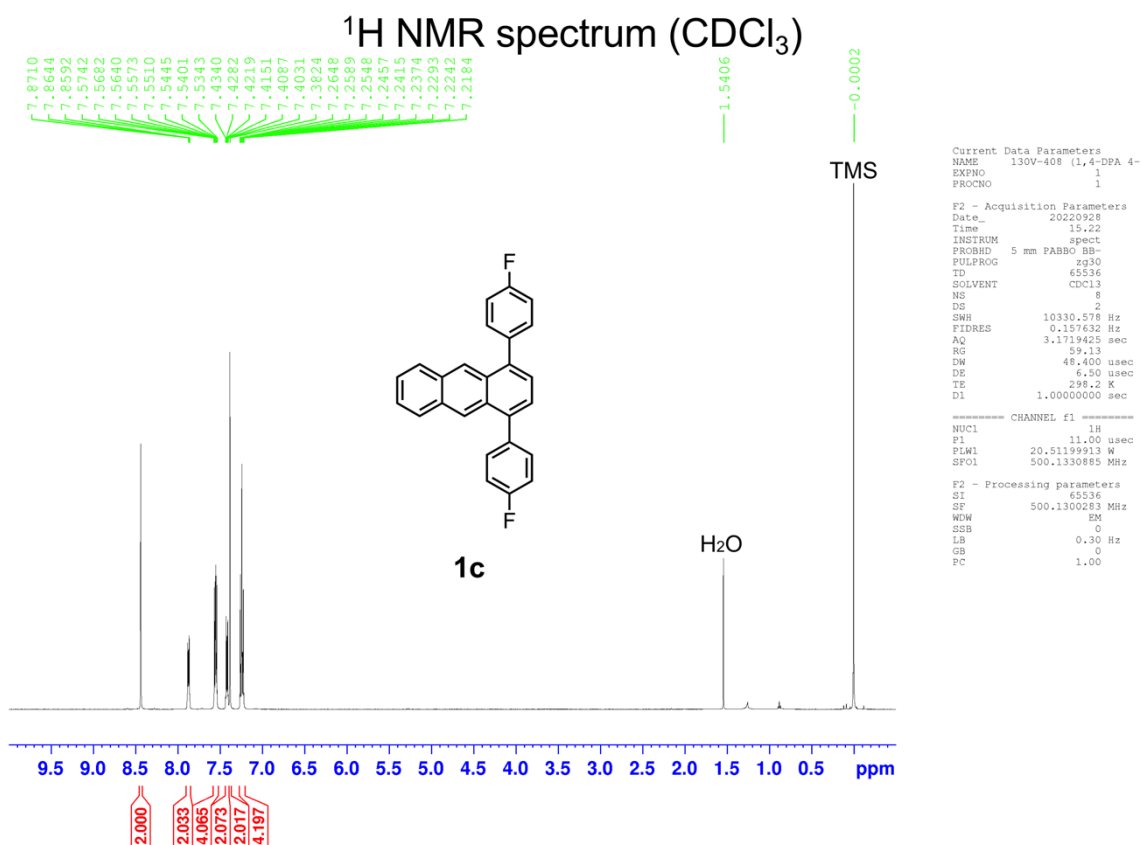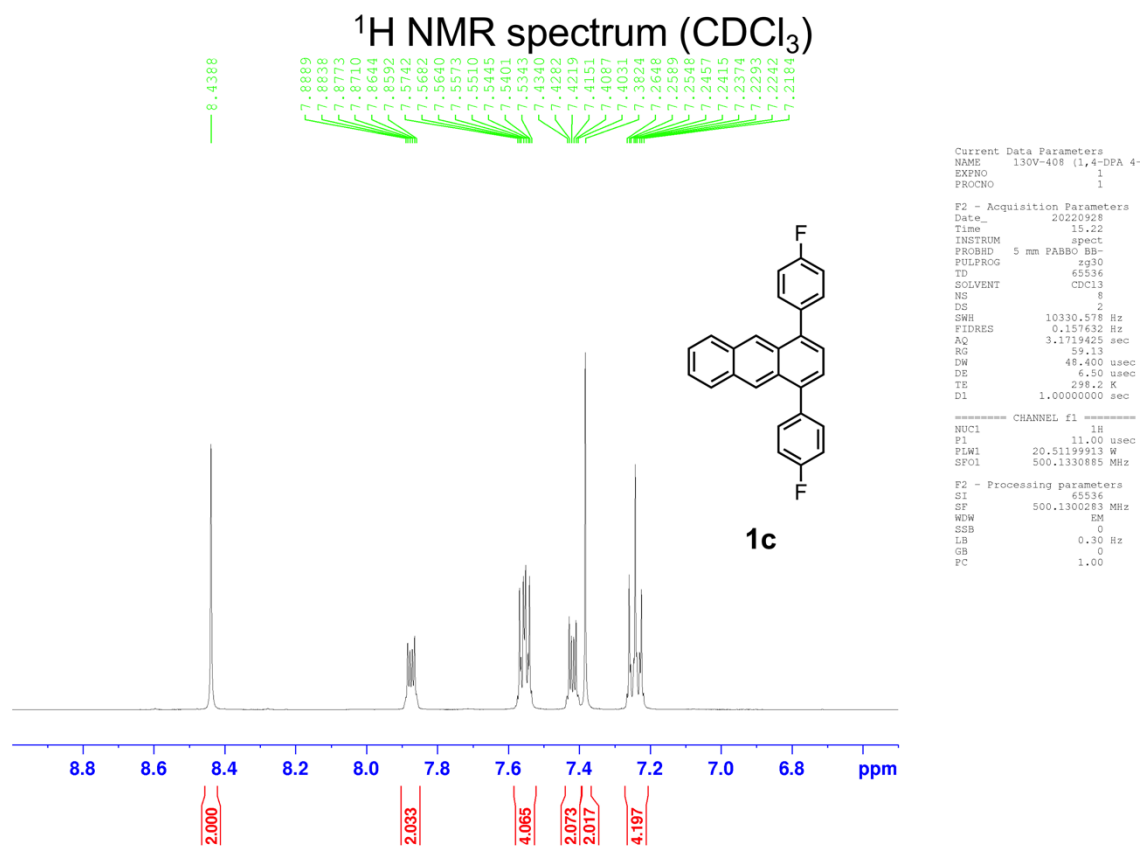

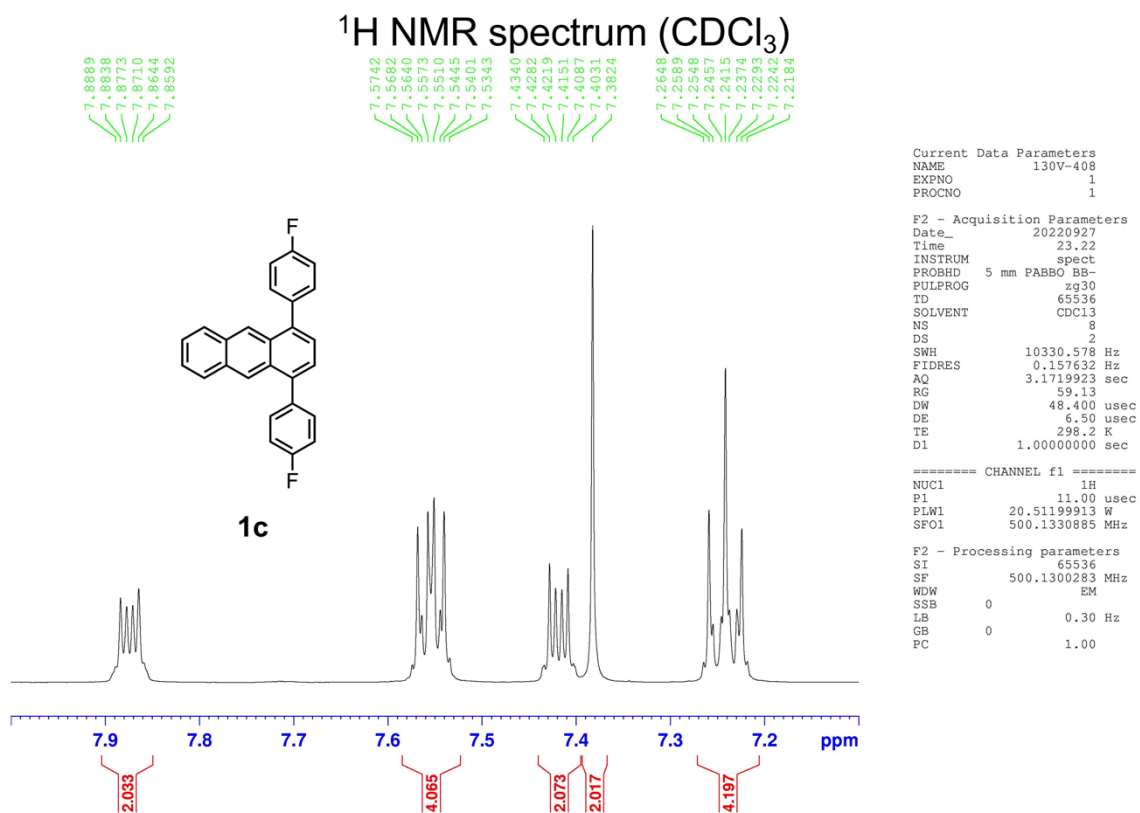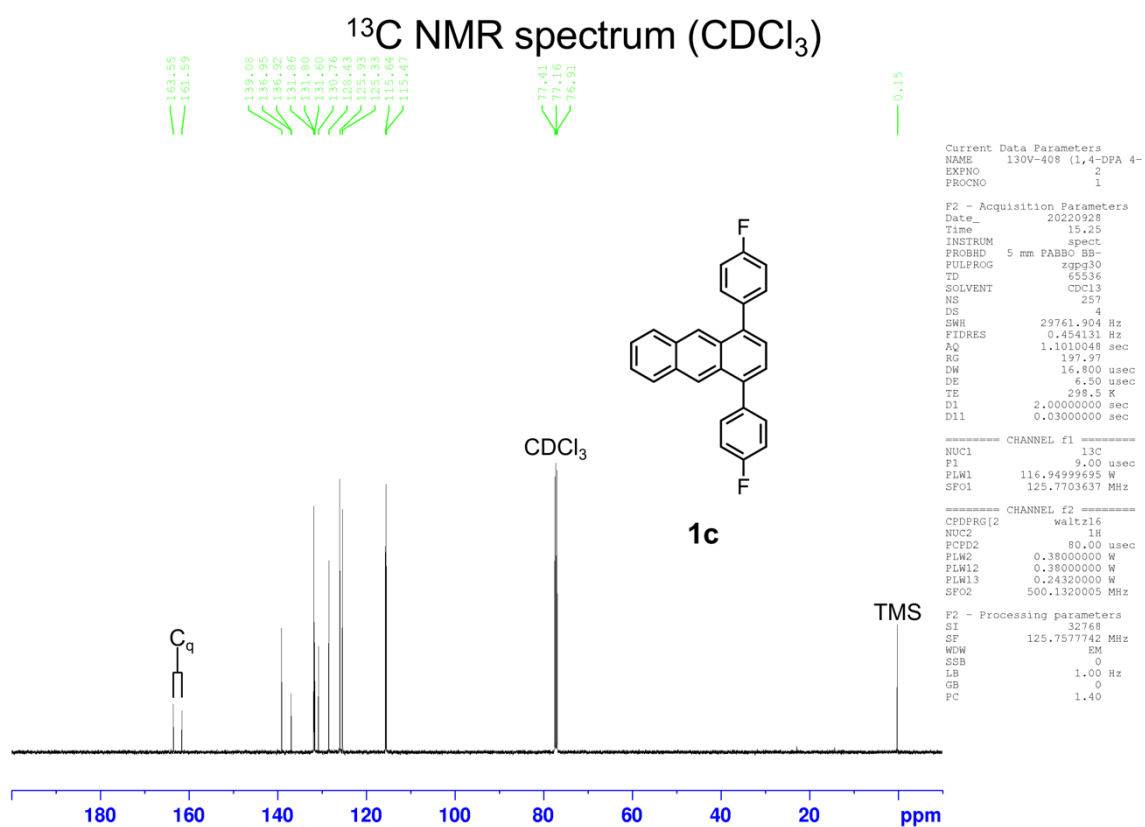

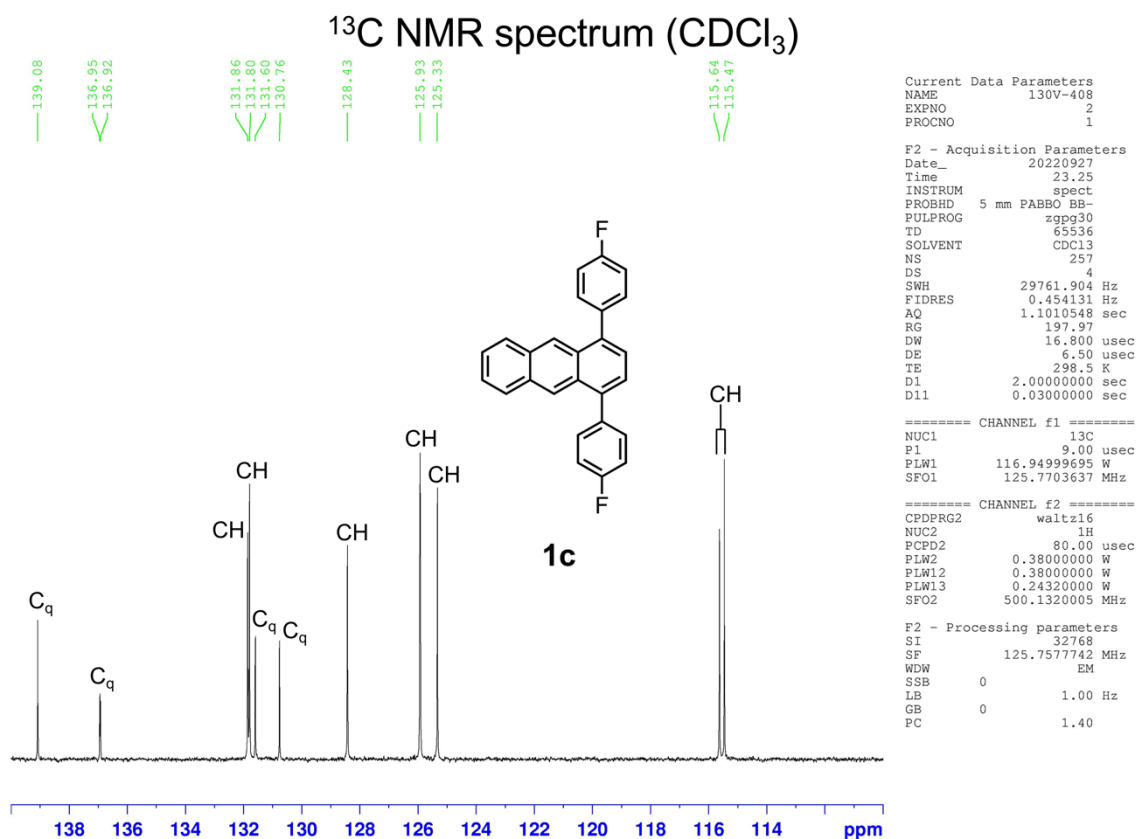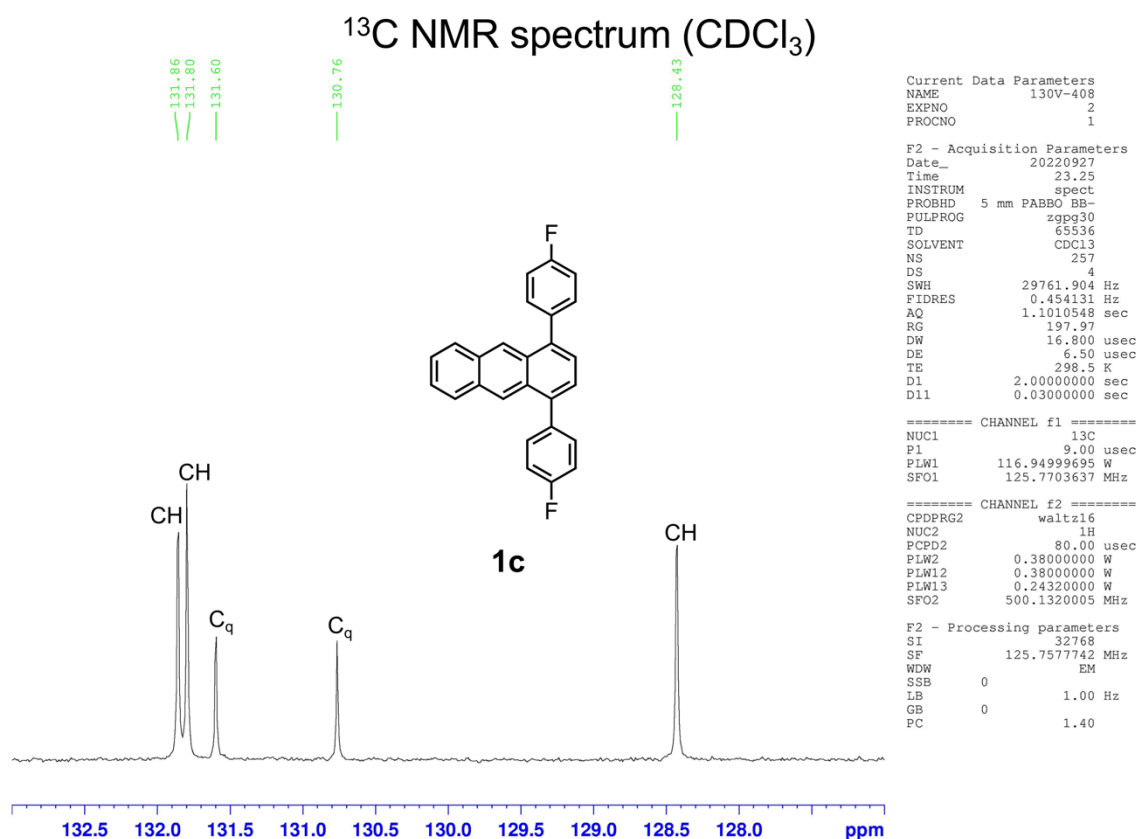

# DEPT 135 NMR spectrum (CDCl<sub>3</sub>)

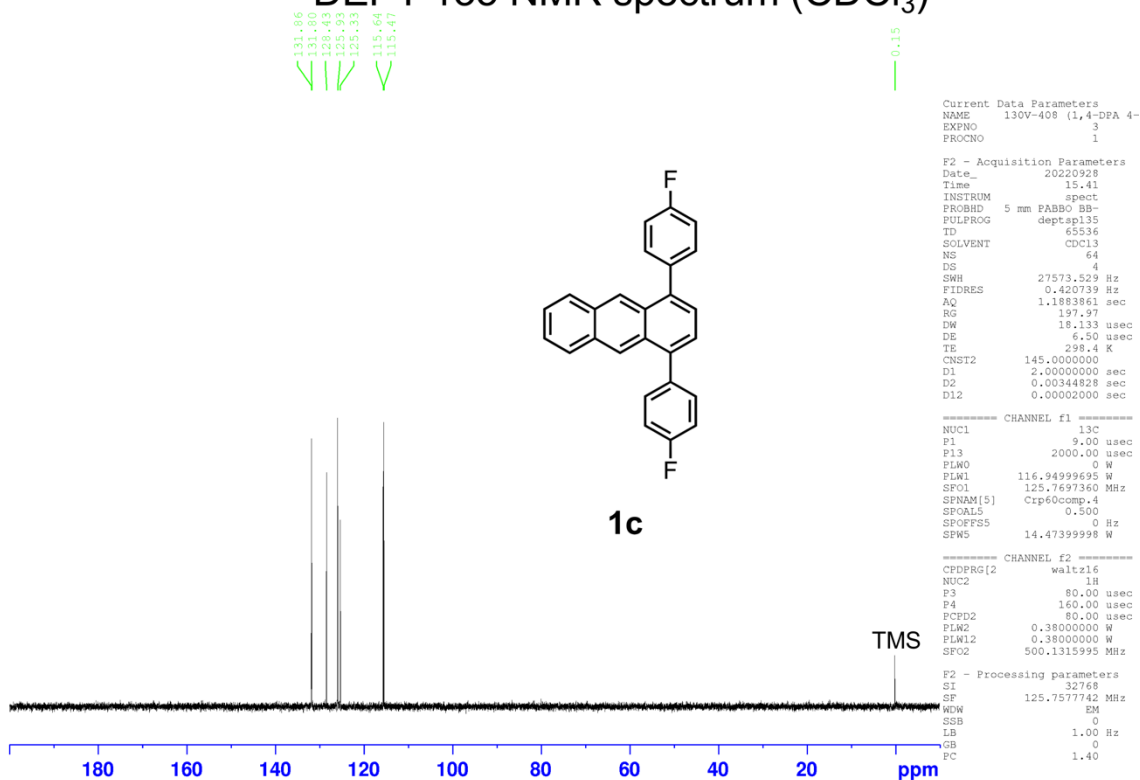

# DEPT 135 NMR spectrum (CDCl<sub>3</sub>)

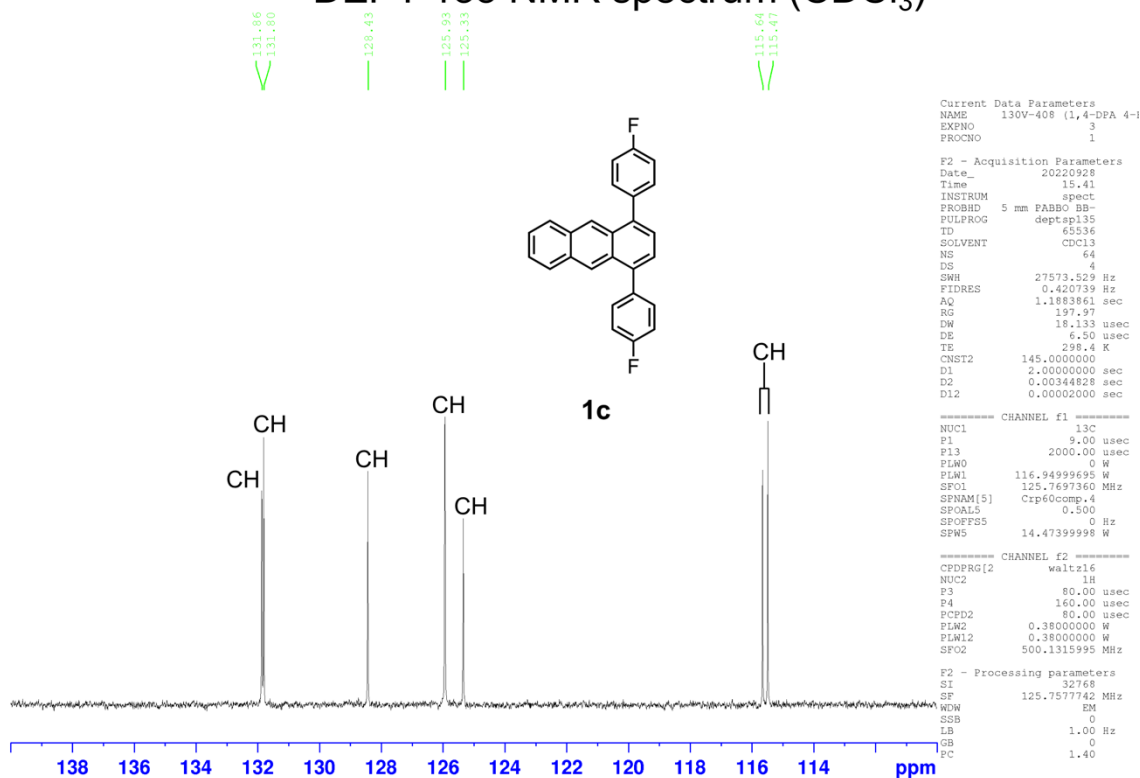

# <sup>19</sup>F NMR spectrum (CDCl<sub>3</sub>)

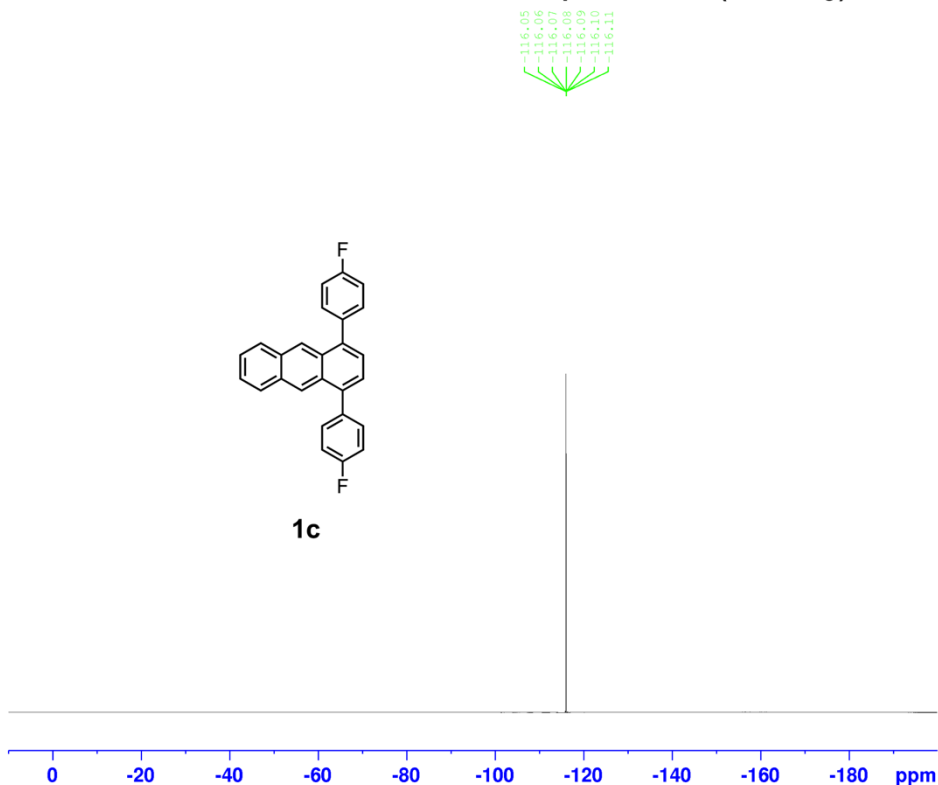

# <sup>1</sup>H NMR spectrum (CDCl<sub>3</sub>)

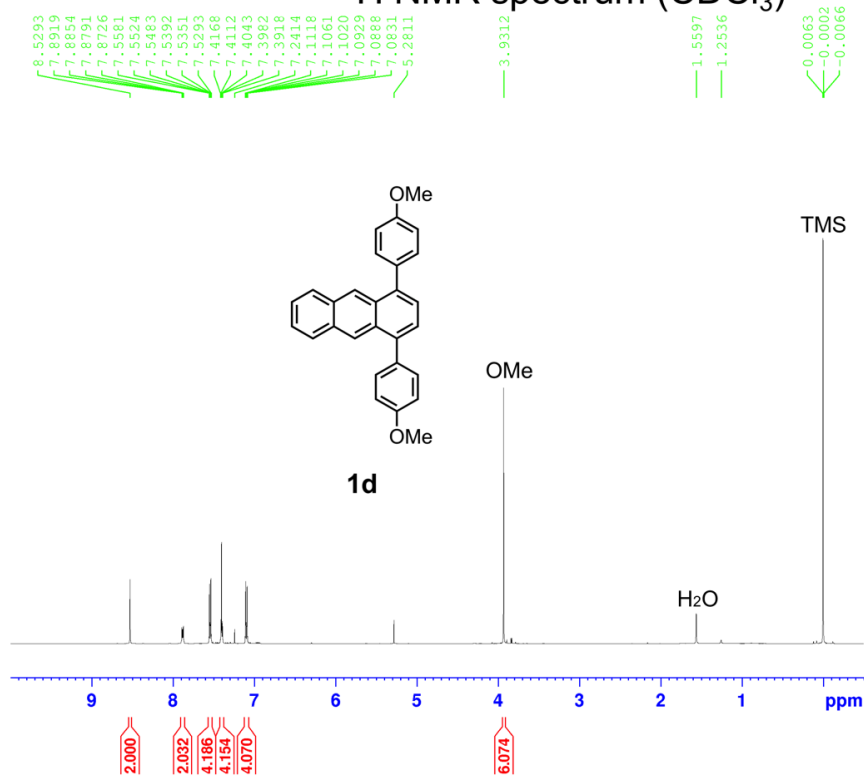

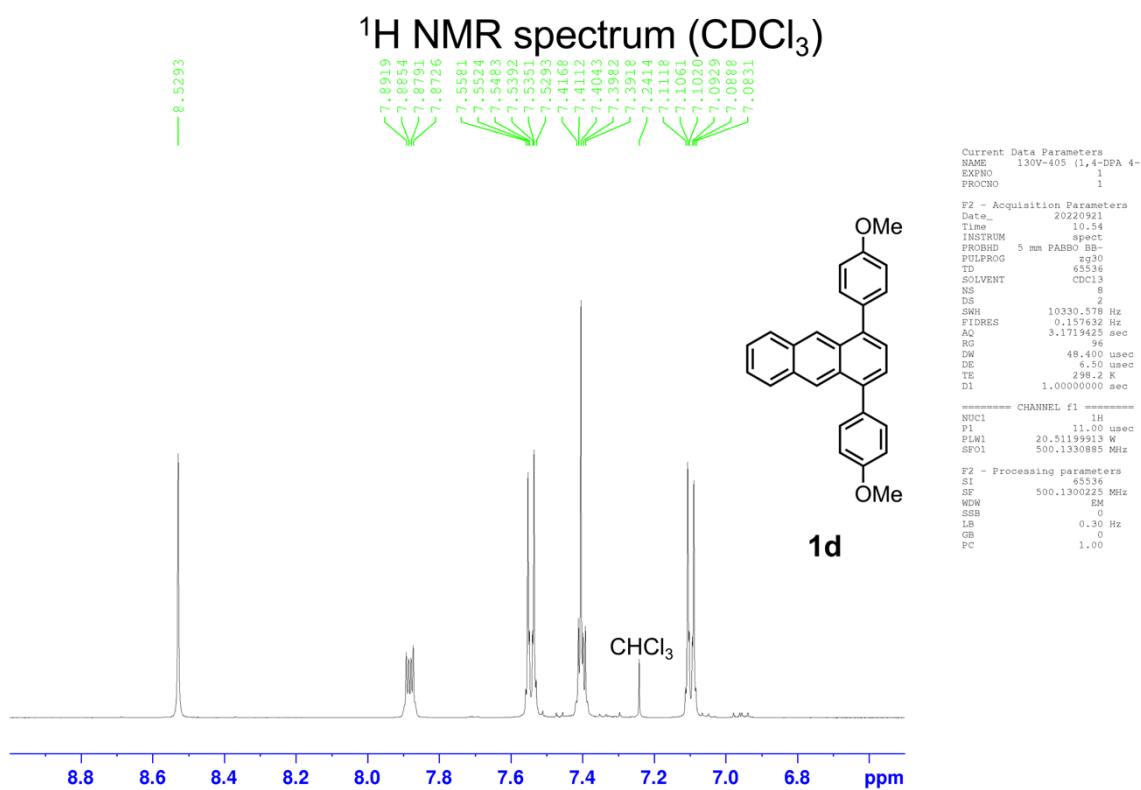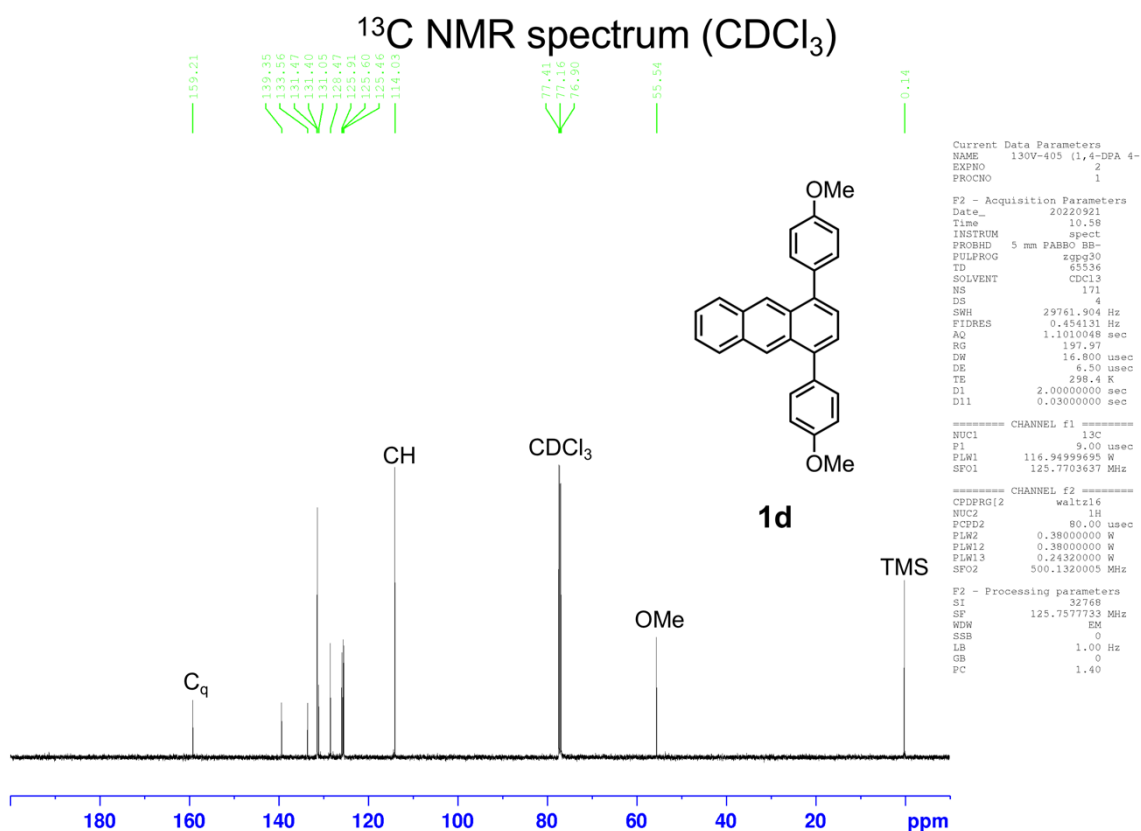

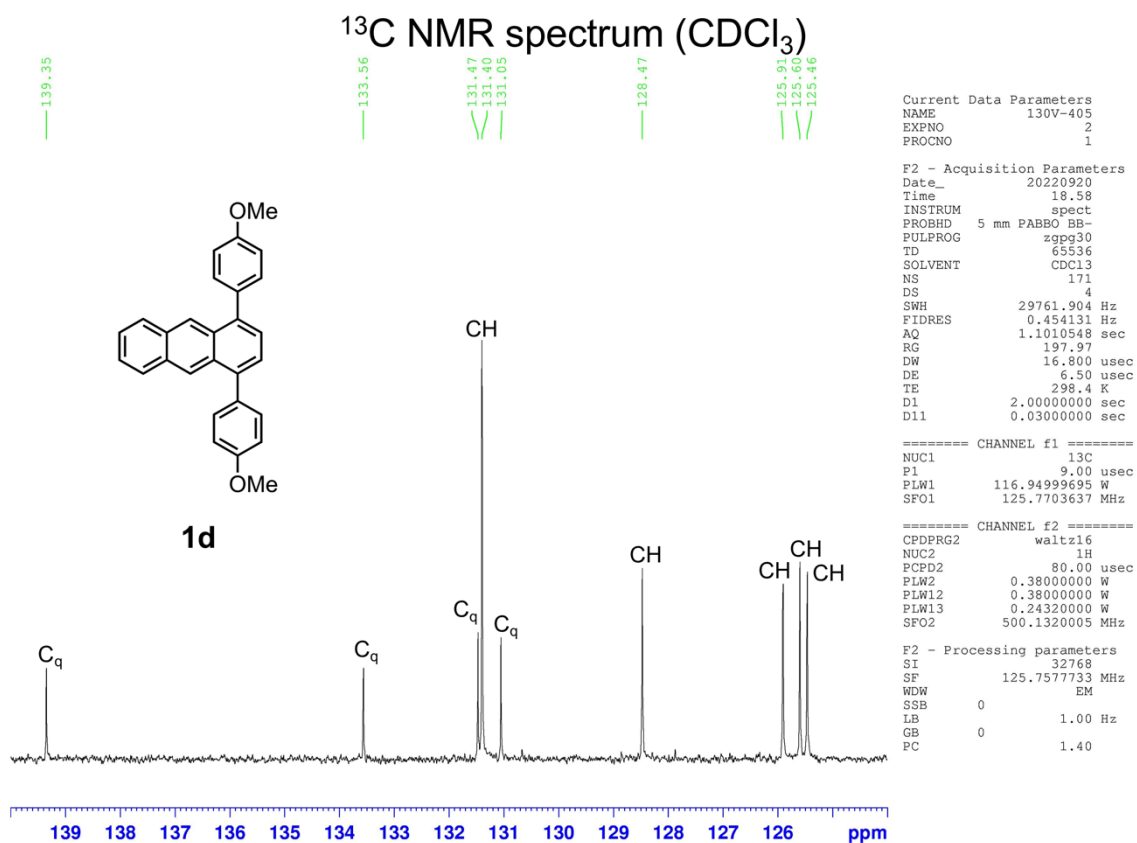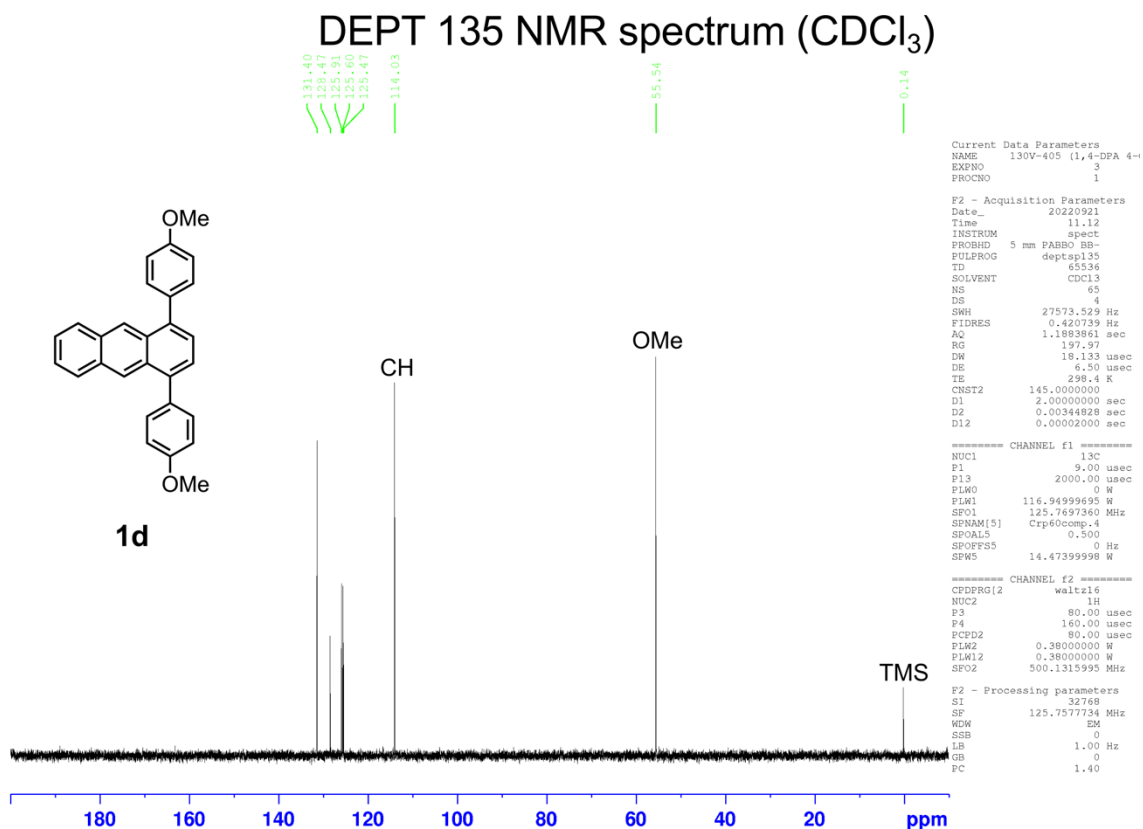

# DEPT 135 NMR spectrum (CDCl<sub>3</sub>)

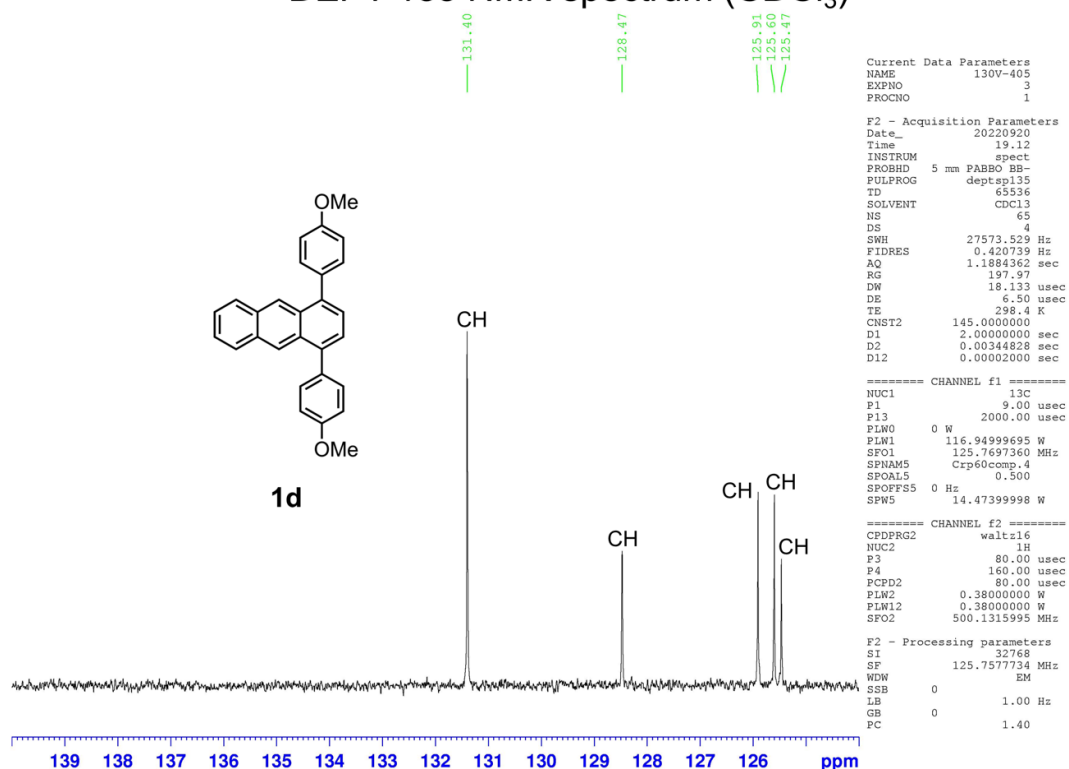

# <sup>1</sup>H NMR spectrum (CDCl<sub>3</sub>)

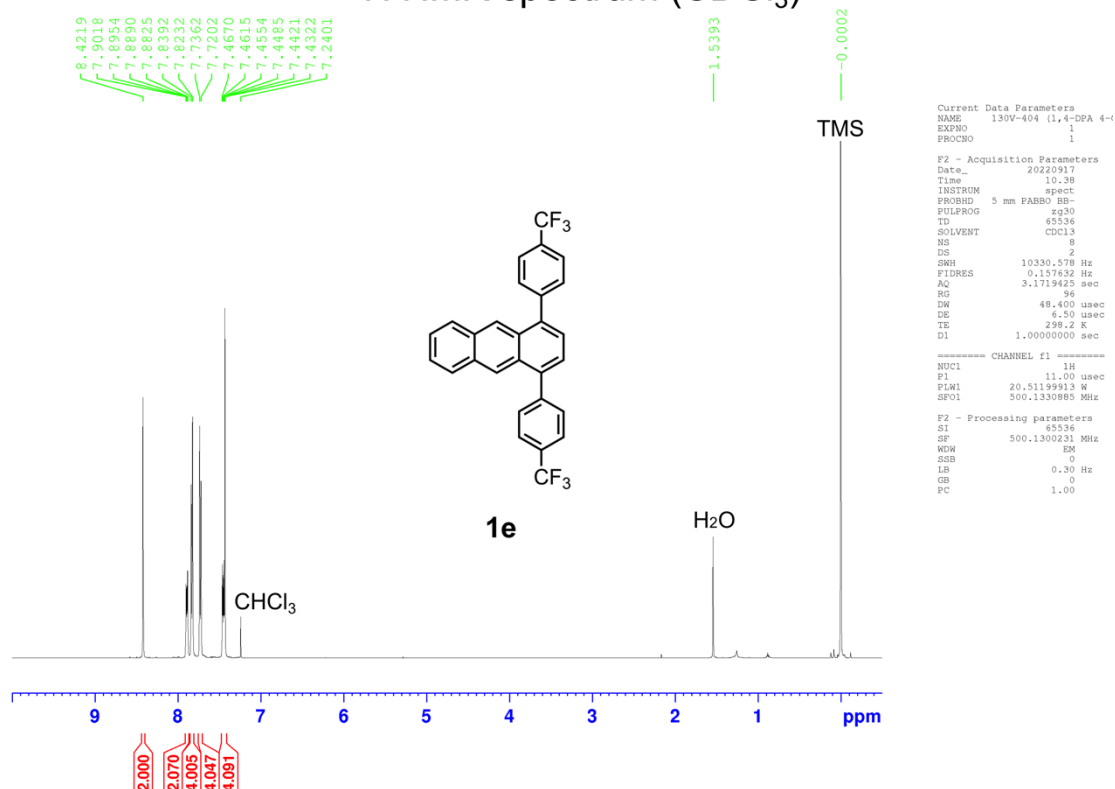



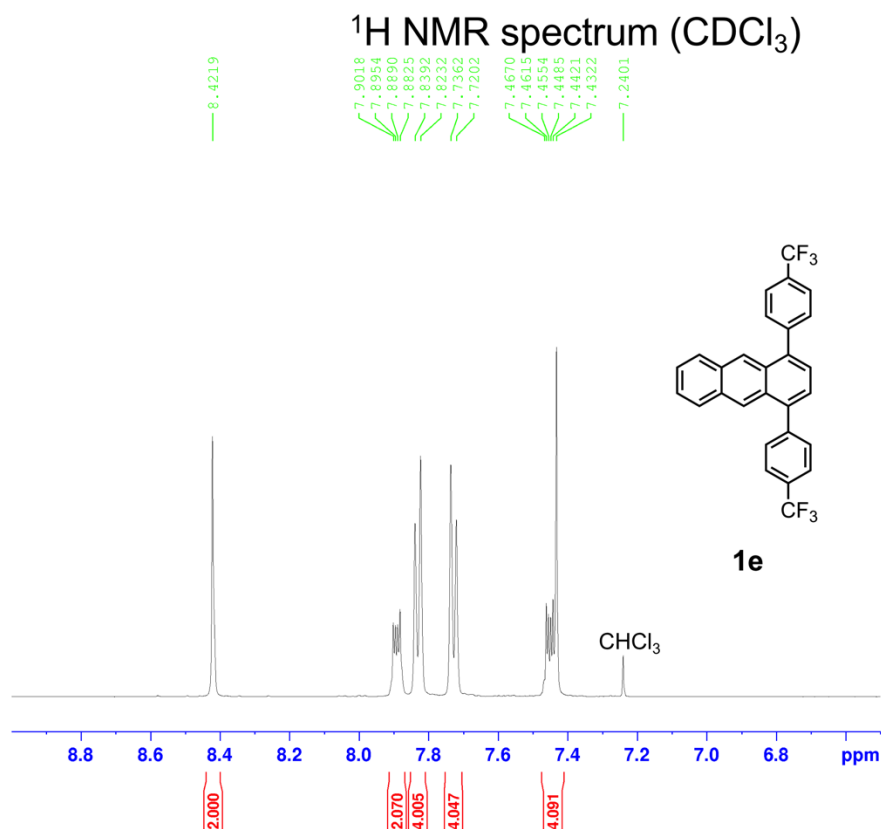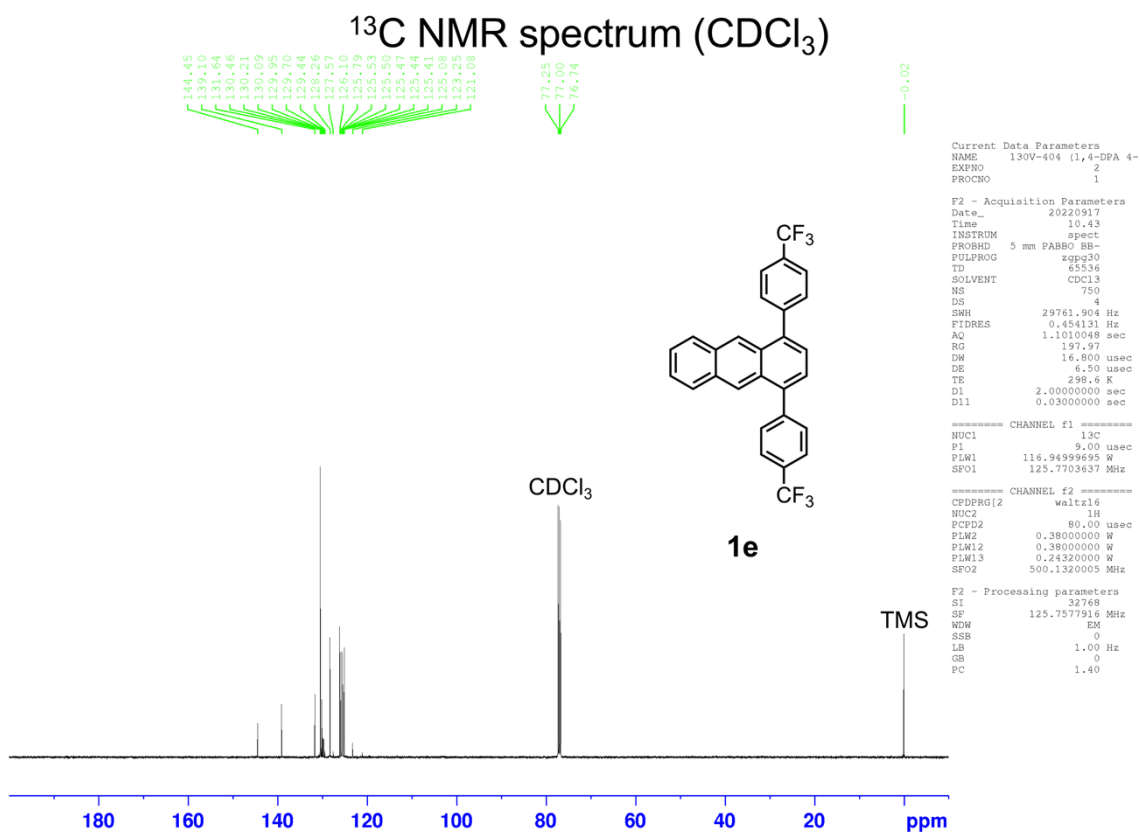

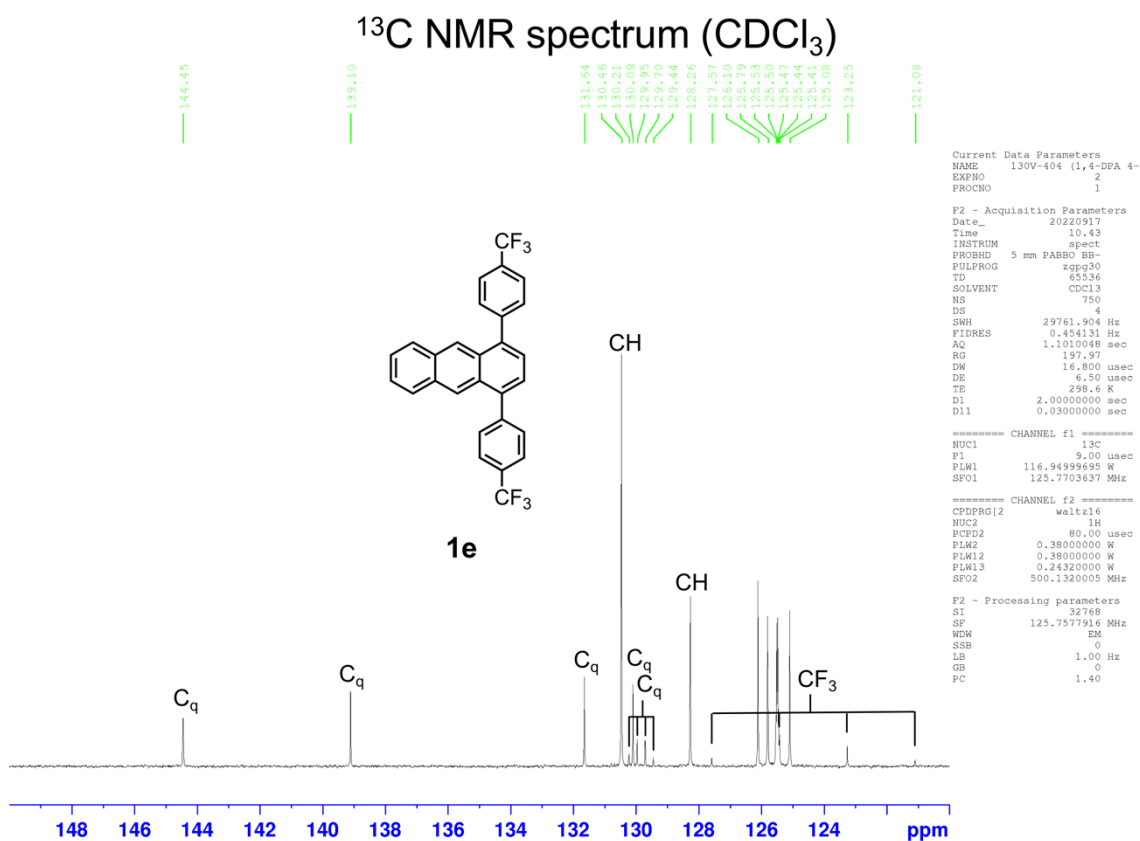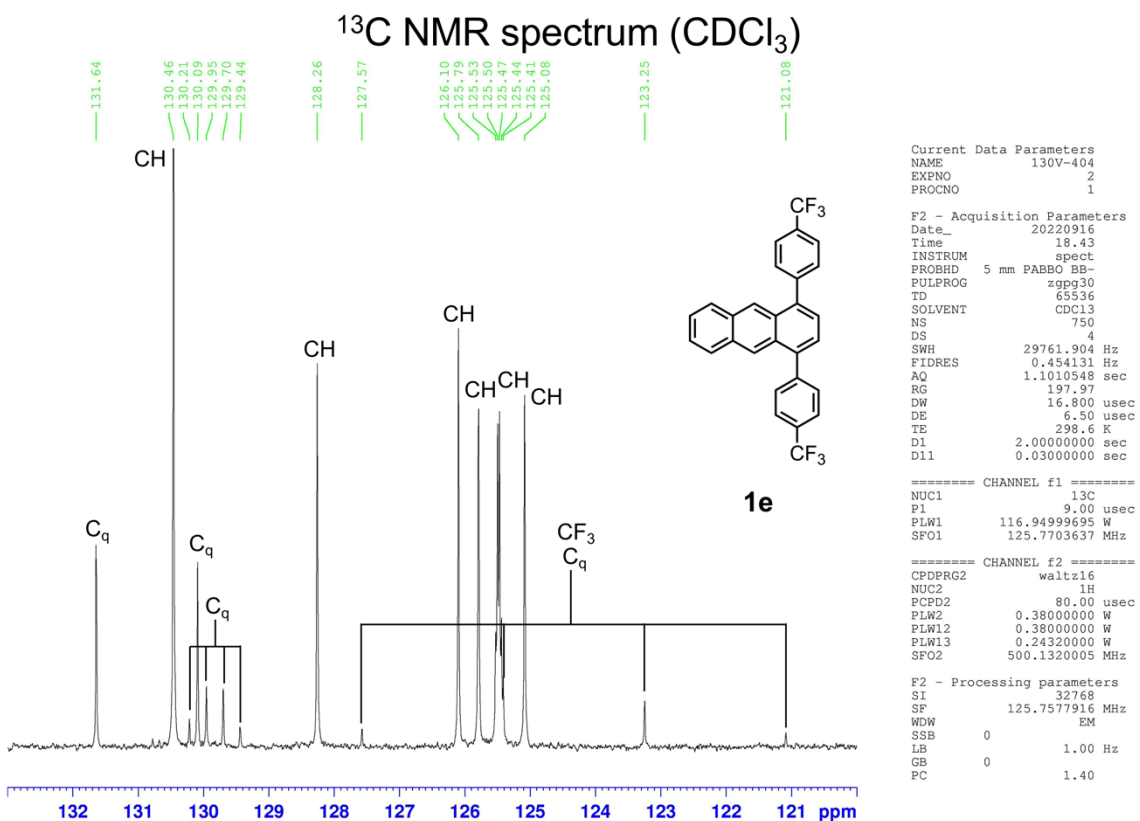

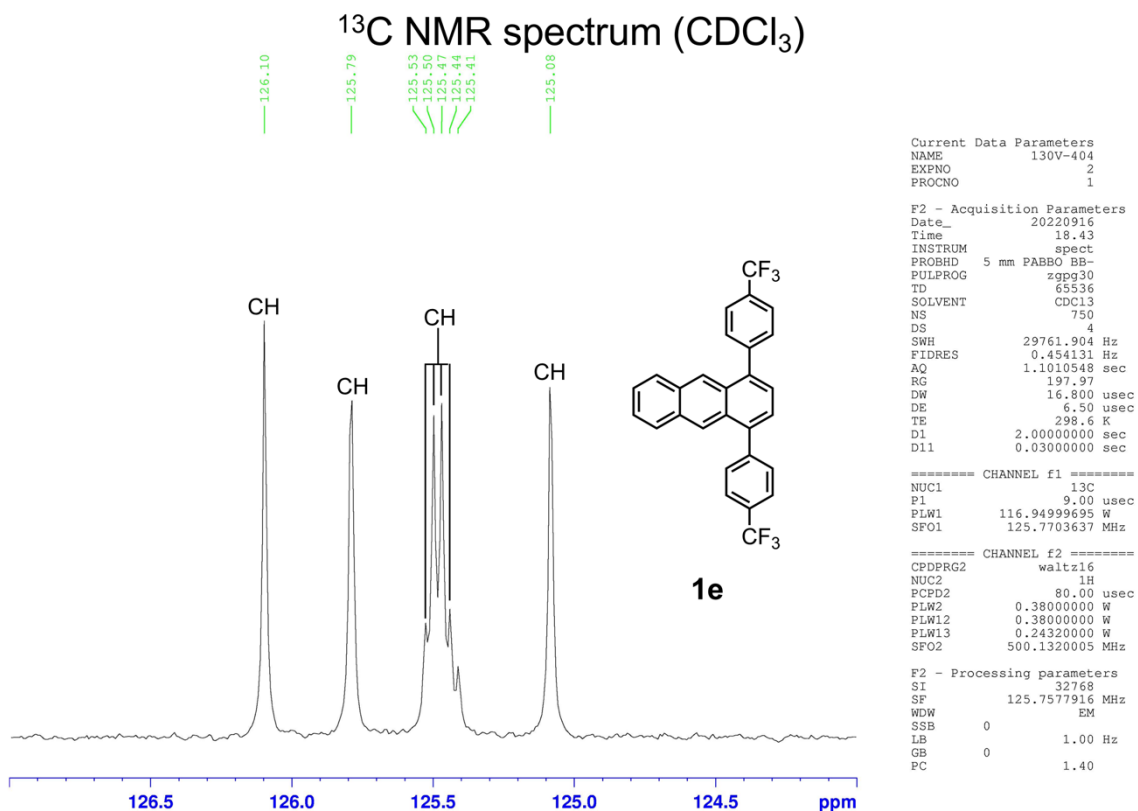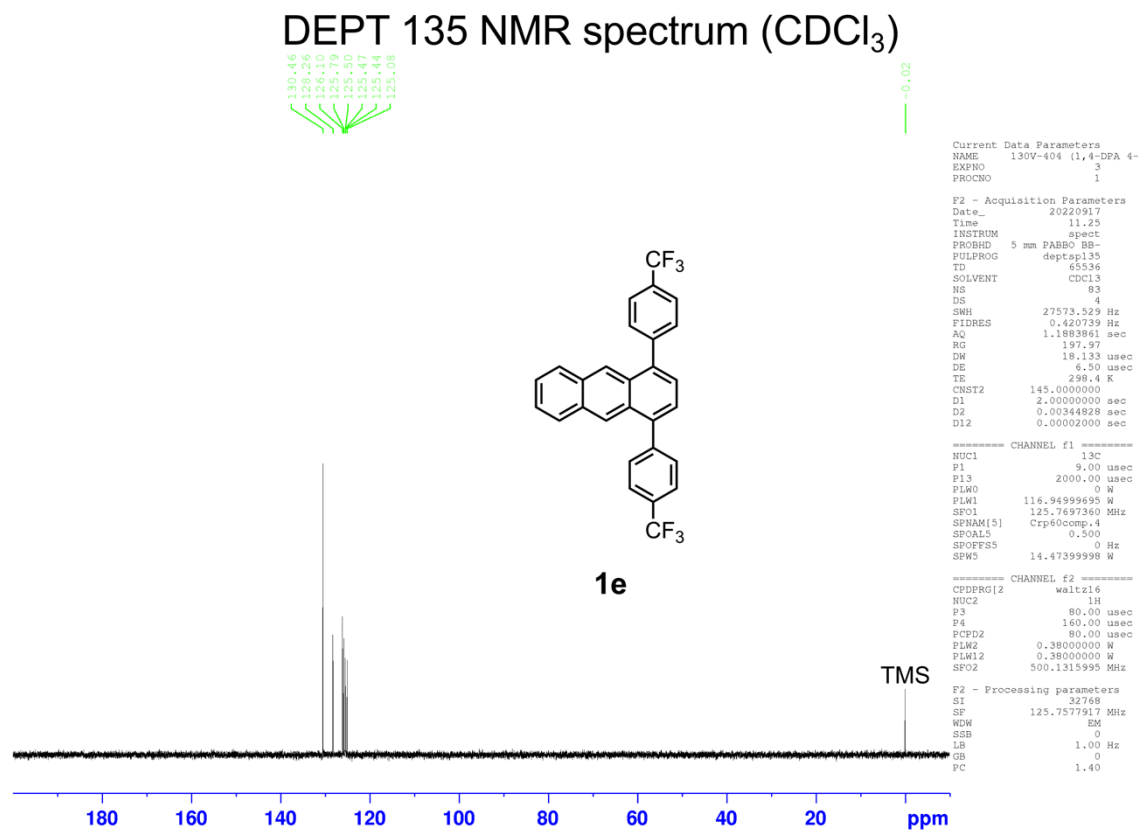

# DEPT 135 NMR spectrum (CDCl<sub>3</sub>)

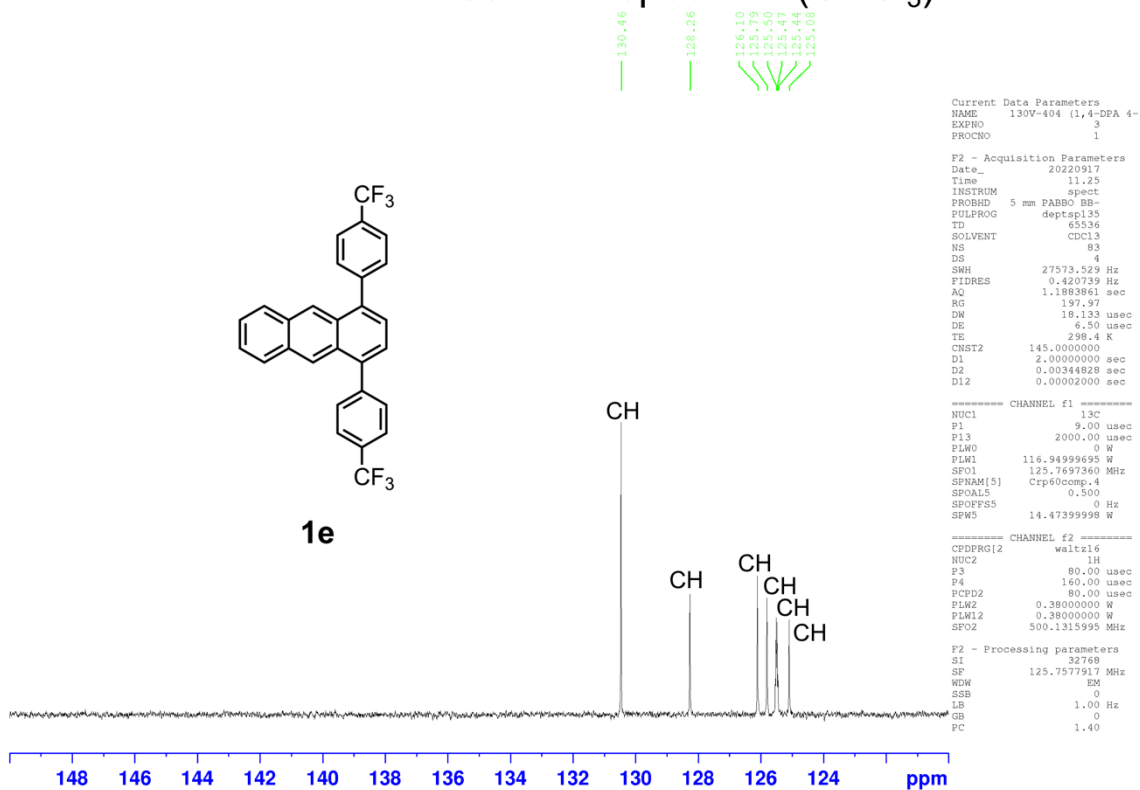

# <sup>19</sup>F NMR spectrum (CDCl<sub>3</sub>)

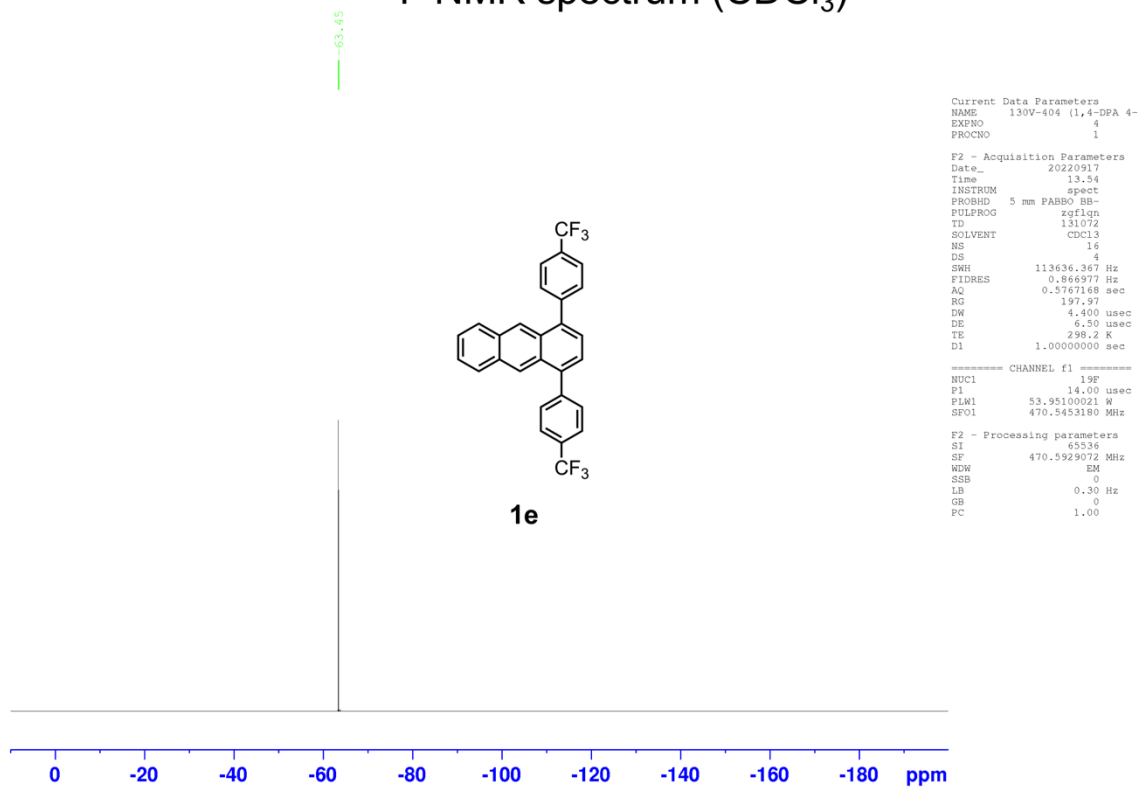

# <sup>1</sup>H NMR spectrum (CDCl<sub>3</sub>)

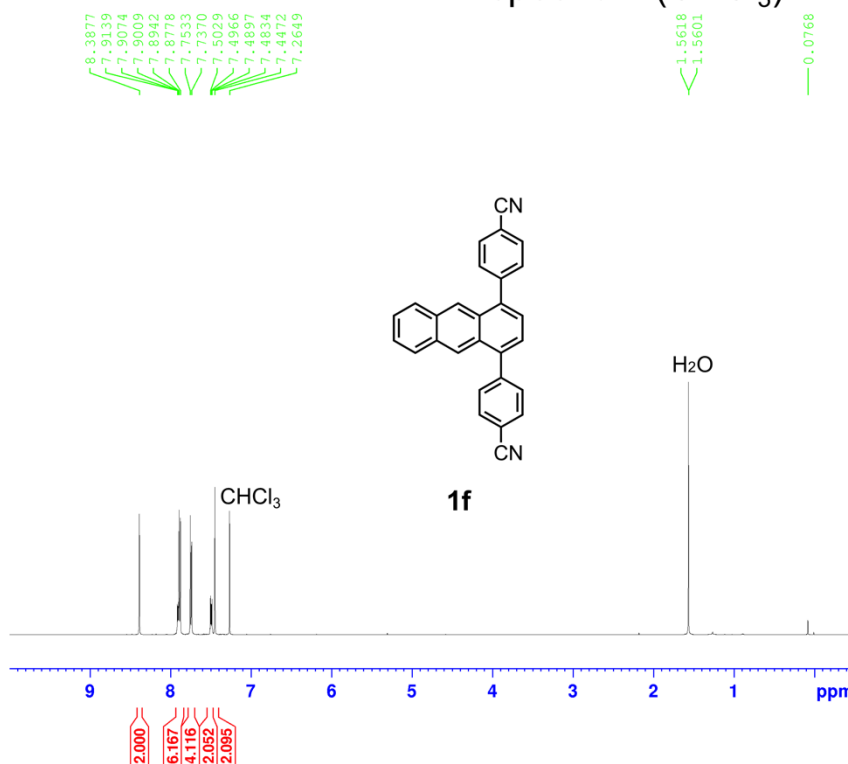

```

Current Data Parameters
NAME      13C 14-DPA 4-CN
EXPNO     1
PROCNO    1

F2 - Acquisition Parameters
Date_     20231209
Time      13.05
INSTRUM   spect
PROBHD    5 mm PABBO BB-
PULPROG   zg30
TD         65536
SOLVENT   CDCl3
NS         16
DS         2
SWH        10330.578 Hz
FIDRES     0.157632 Hz
AQ         3.1719425 sec
RG         197.97
DW         48.400 usec
DE         6.50 usec
TE         298.2 K
D1         1.00000000 sec

===== CHANNEL f1 =====
NUC1       1H
P1         11.00 usec
PLW1       20.51199913 W
SFO1       500.1330885 MHz

F2 - Processing parameters
SI         65536
SF         500.1300107 MHz
WDW        EM
SSB        0
LB         0.30 Hz
GB         0
PC         1.00
  
```

# <sup>1</sup>H NMR spectrum (CDCl<sub>3</sub>)

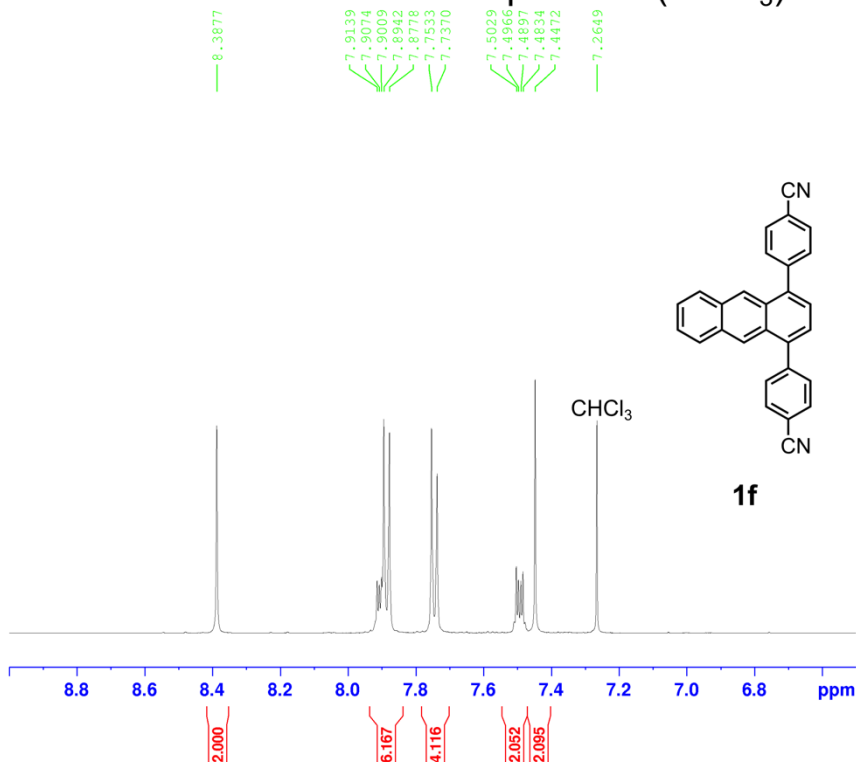

```

Current Data Parameters
NAME      13C 14-DPA 4-CN
EXPNO     1
PROCNO    1

F2 - Acquisition Parameters
Date_     20231209
Time      13.05
INSTRUM   spect
PROBHD    5 mm PABBO BB-
PULPROG   zg30
TD         65536
SOLVENT   CDCl3
NS         16
DS         2
SWH        10330.578 Hz
FIDRES     0.157632 Hz
AQ         3.1719425 sec
RG         197.97
DW         48.400 usec
DE         6.50 usec
TE         298.2 K
D1         1.00000000 sec

===== CHANNEL f1 =====
NUC1       1H
P1         11.00 usec
PLW1       20.51199913 W
SFO1       500.1330885 MHz

F2 - Processing parameters
SI         65536
SF         500.1300107 MHz
WDW        EM
SSB        0
LB         0.30 Hz
GB         0
PC         1.00
  
```

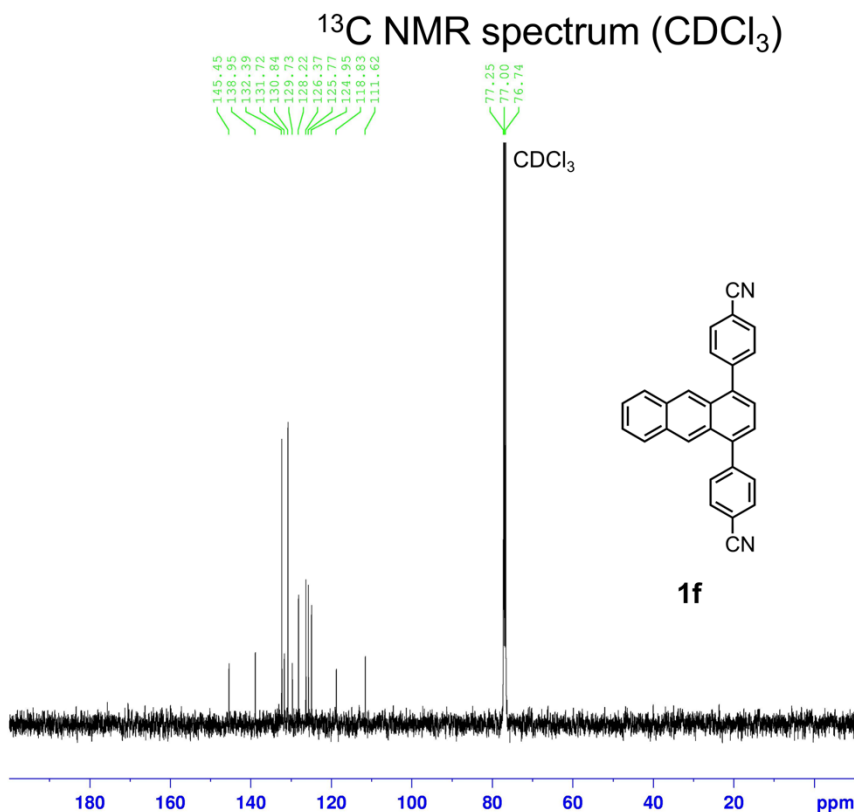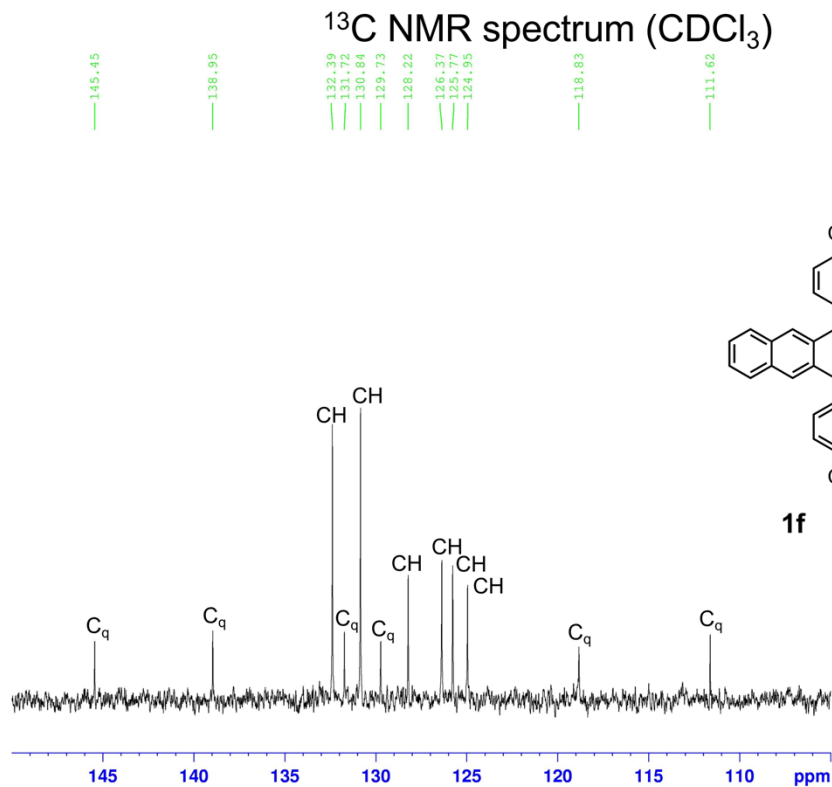

# DEPT 135 NMR spectrum (CDCl<sub>3</sub>)

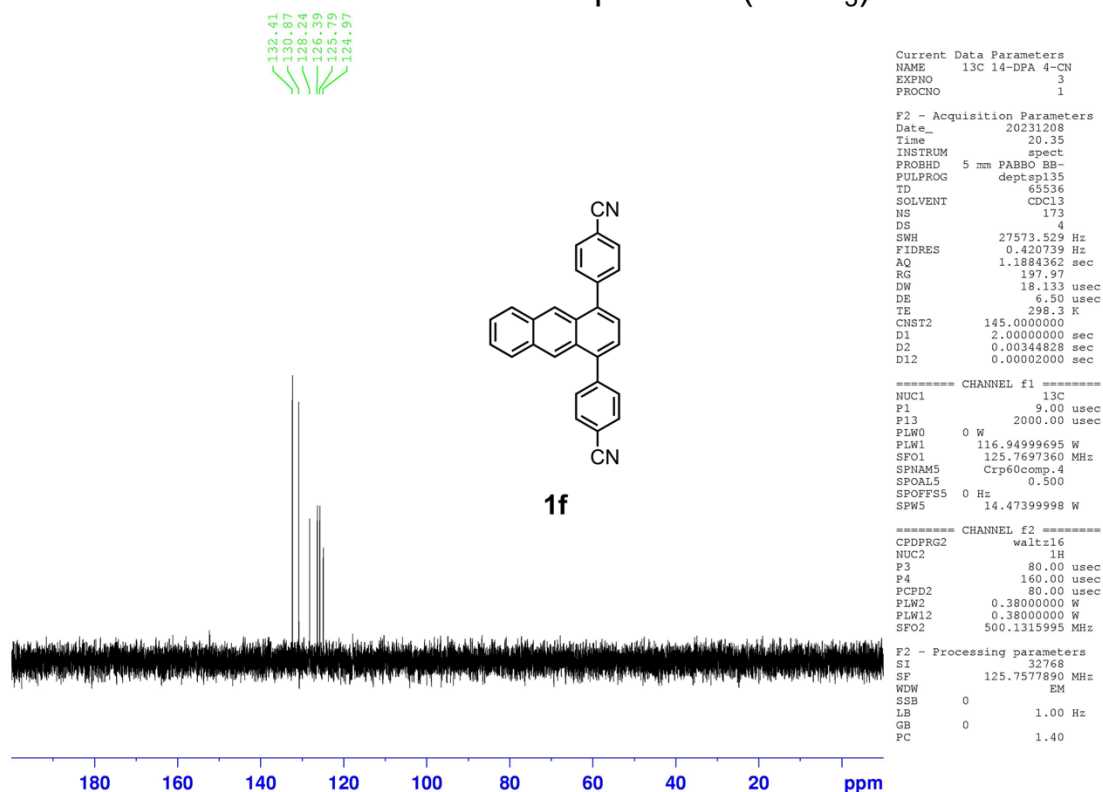

# DEPT 135 NMR spectrum (CDCl<sub>3</sub>)

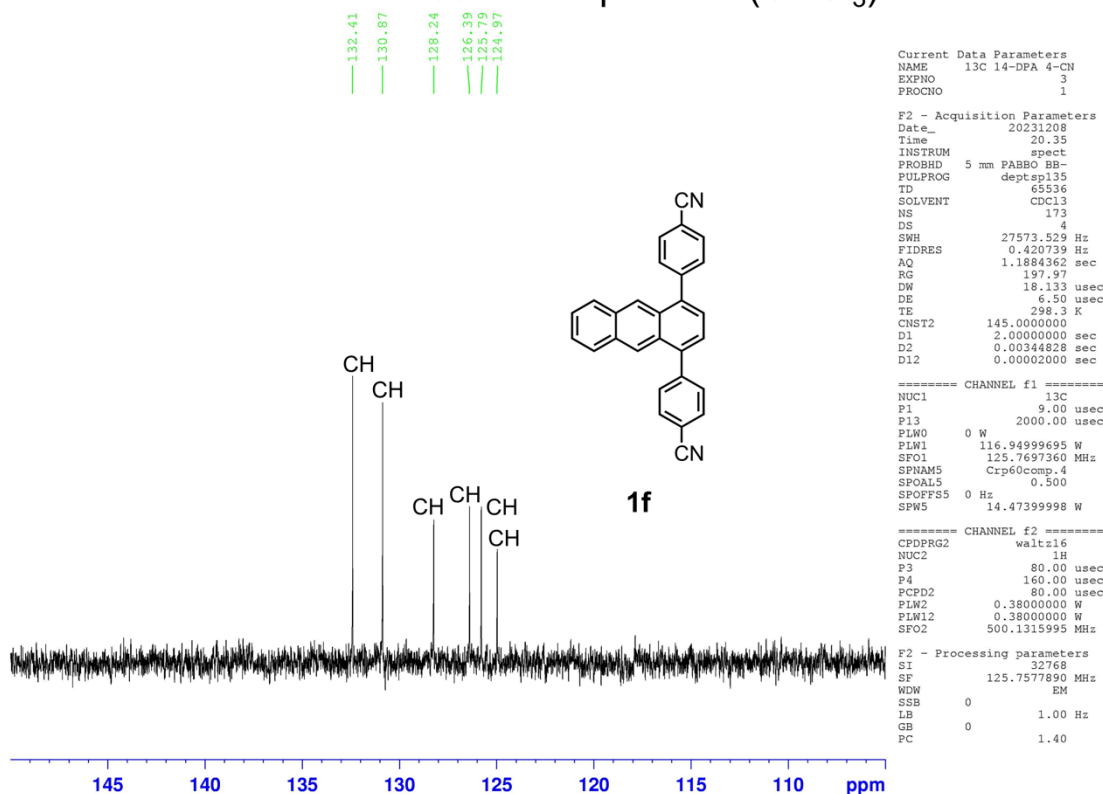

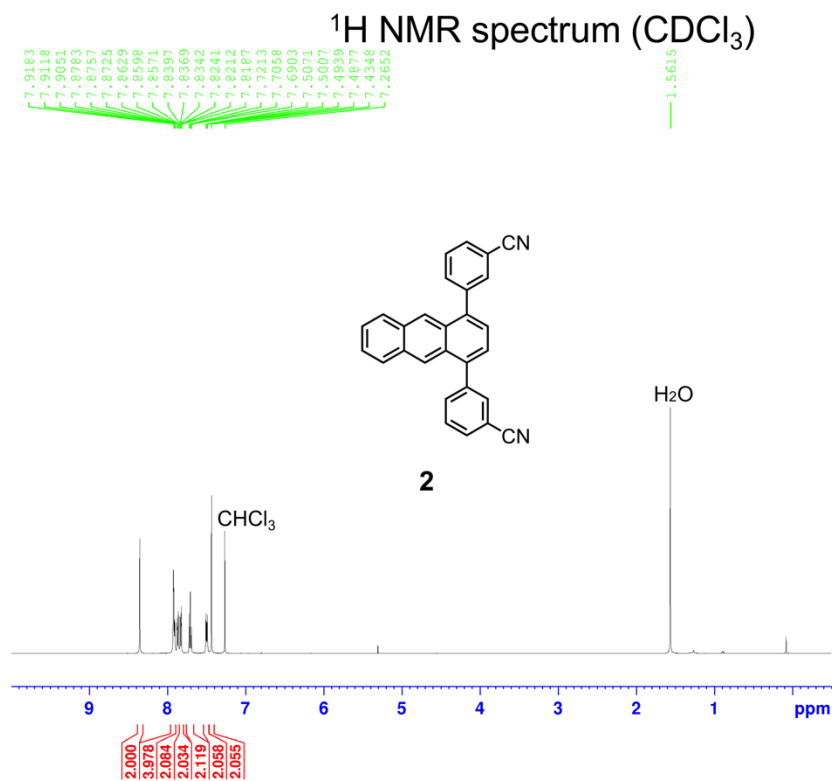

Current Data Parameters  
NAME 13C 14-DPA 3-CN  
EXPNO 1  
PROCNO 1

F2 - Acquisition Parameters  
Date\_ 20231209  
Time 15.09  
INSTRUM spect  
PROBHD 5 mm PABBO BB-  
PULPROG zg30  
TD 65536  
SOLVENT CDCl3  
NS 16  
DS 2  
SWH 10330.578 Hz  
FIDRES 0.157632 Hz  
AQ 3.1719425 sec  
RG 197.97  
DW 48.400 usec  
DE 6.50 usec  
TE 298.2 K  
D1 1.00000000 sec

===== CHANNEL f1 =====  
NUC1 1H  
P1 11.00 usec  
PLW1 20.51199913 W  
SFO1 500.1330885 MHz

F2 - Processing parameters  
SI 65536  
SF 500.1330107 MHz  
WDW EM  
SSB 0  
LB 0.30 Hz  
GB 0  
PC 1.00

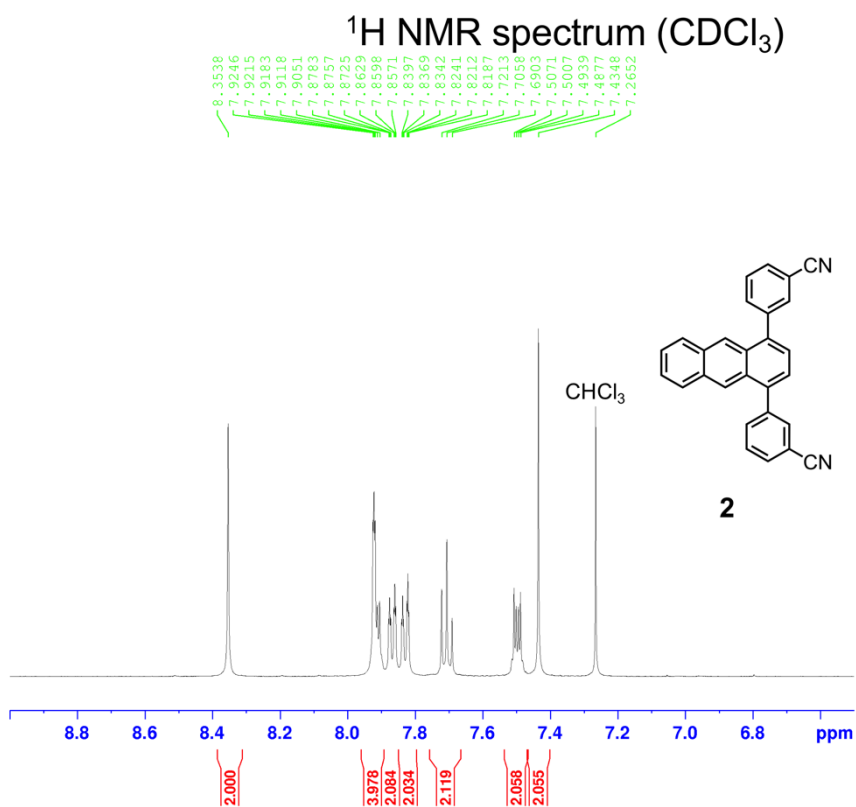

Current Data Parameters  
NAME 13C 14-DPA 3-CN  
EXPNO 1  
PROCNO 1

F2 - Acquisition Parameters  
Date\_ 20231209  
Time 15.09  
INSTRUM spect  
PROBHD 5 mm PABBO BB-  
PULPROG zg30  
TD 65536  
SOLVENT CDCl3  
NS 16  
DS 2  
SWH 10330.578 Hz  
FIDRES 0.157632 Hz  
AQ 3.1719425 sec  
RG 197.97  
DW 48.400 usec  
DE 6.50 usec  
TE 298.2 K  
D1 1.00000000 sec

===== CHANNEL f1 =====  
NUC1 1H  
P1 11.00 usec  
PLW1 20.51199913 W  
SFO1 500.1330885 MHz

F2 - Processing parameters  
SI 65536  
SF 500.1330107 MHz  
WDW EM  
SSB 0  
LB 0.30 Hz  
GB 0  
PC 1.00



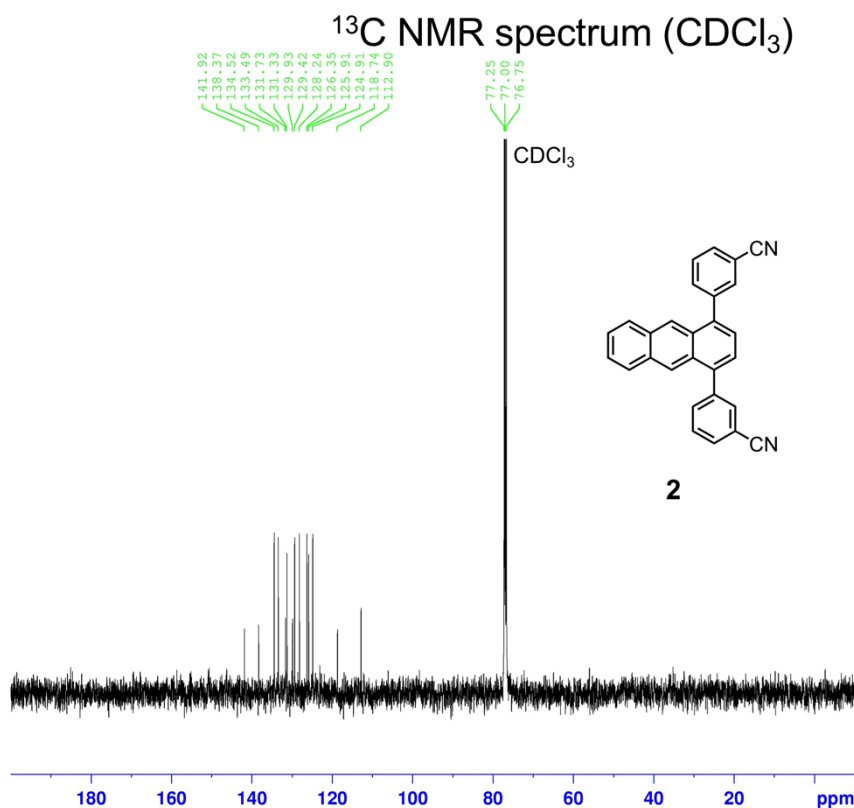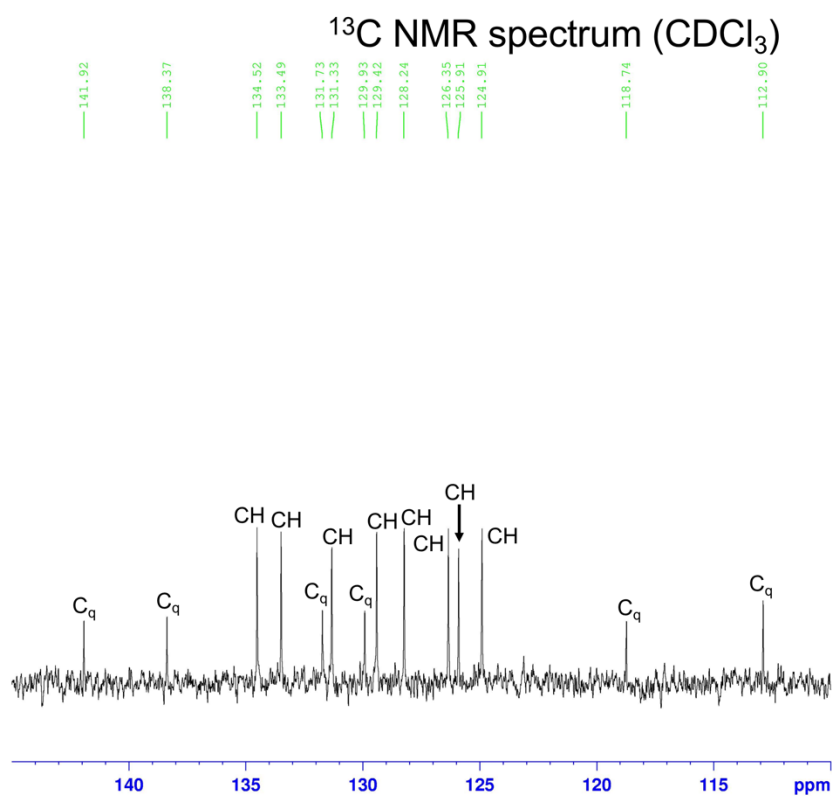

# DEPT 135 NMR spectrum (CDCl<sub>3</sub>)

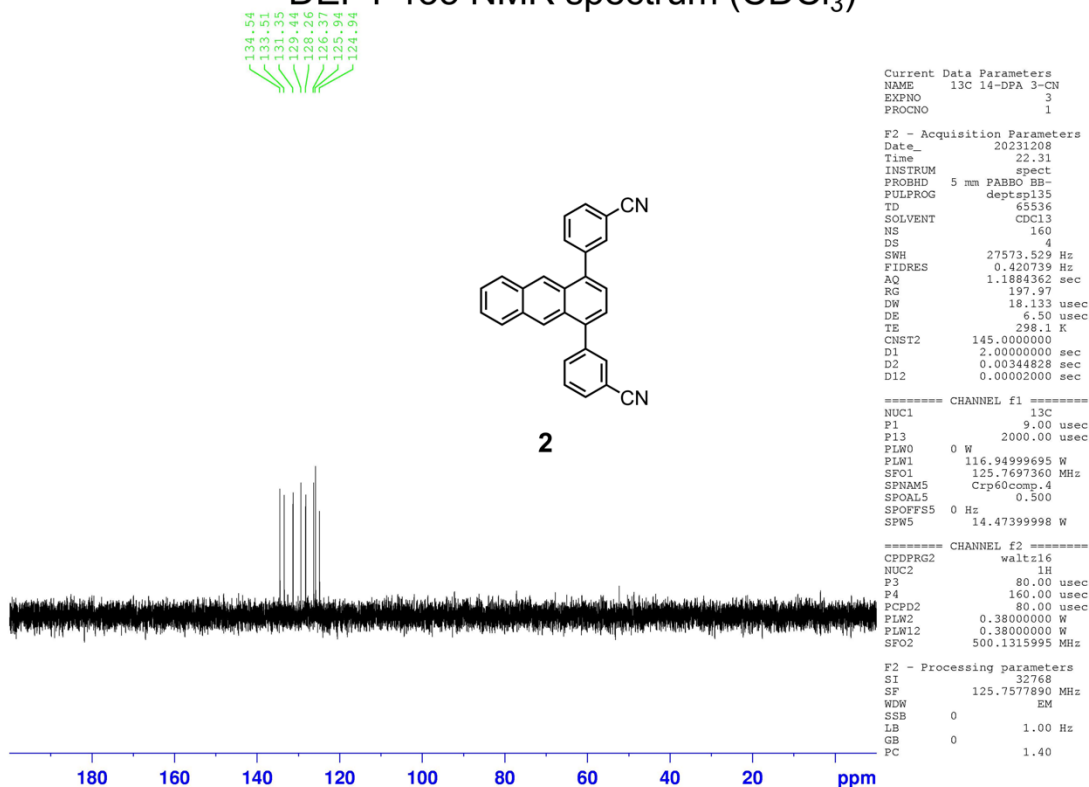

# DEPT 135 NMR spectrum (CDCl<sub>3</sub>)

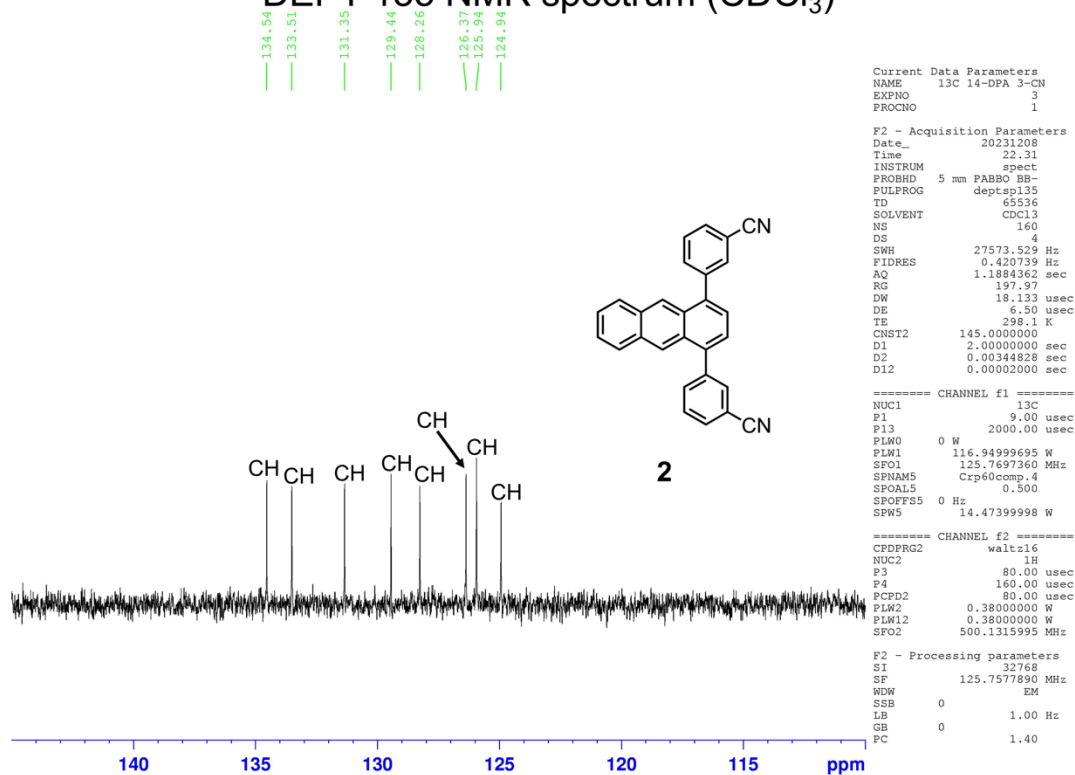

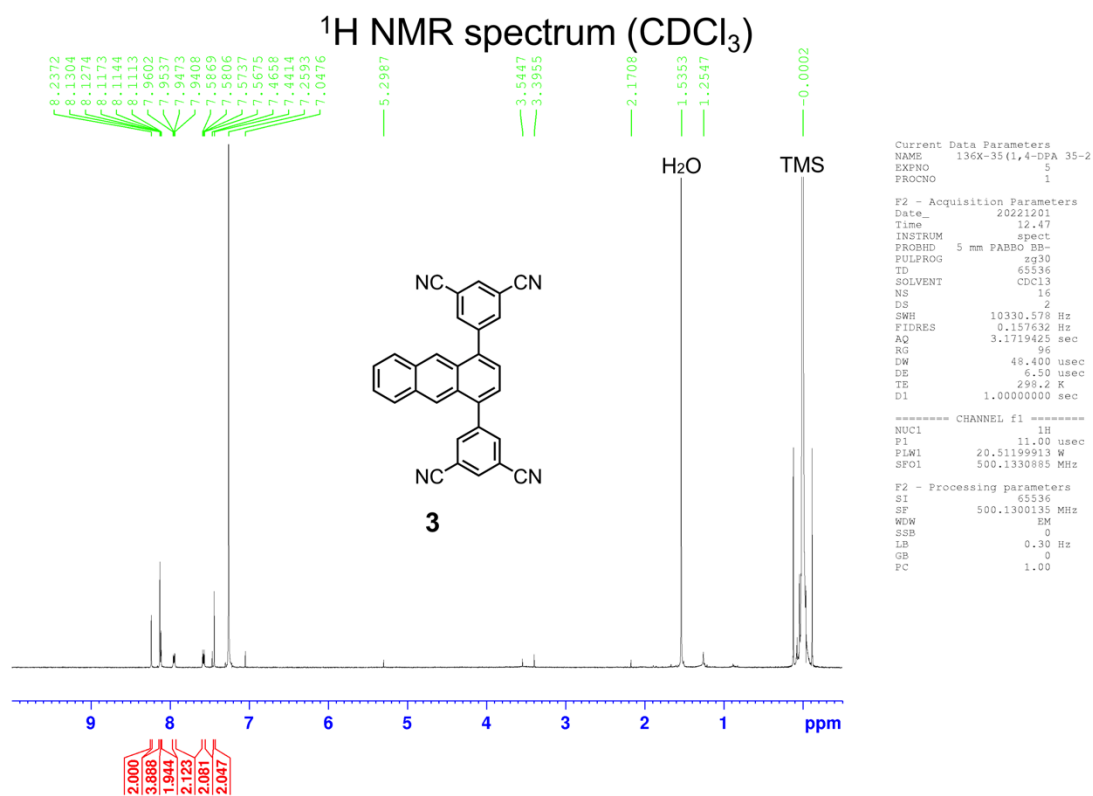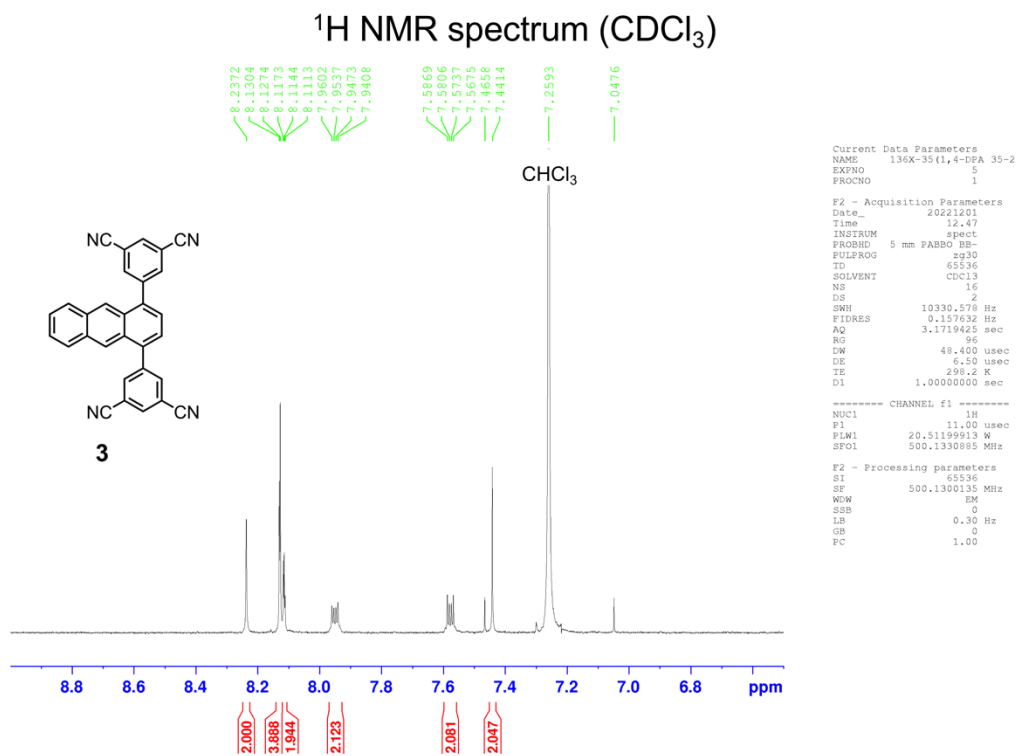

# <sup>13</sup>C NMR spectrum (CDCl<sub>3</sub>)

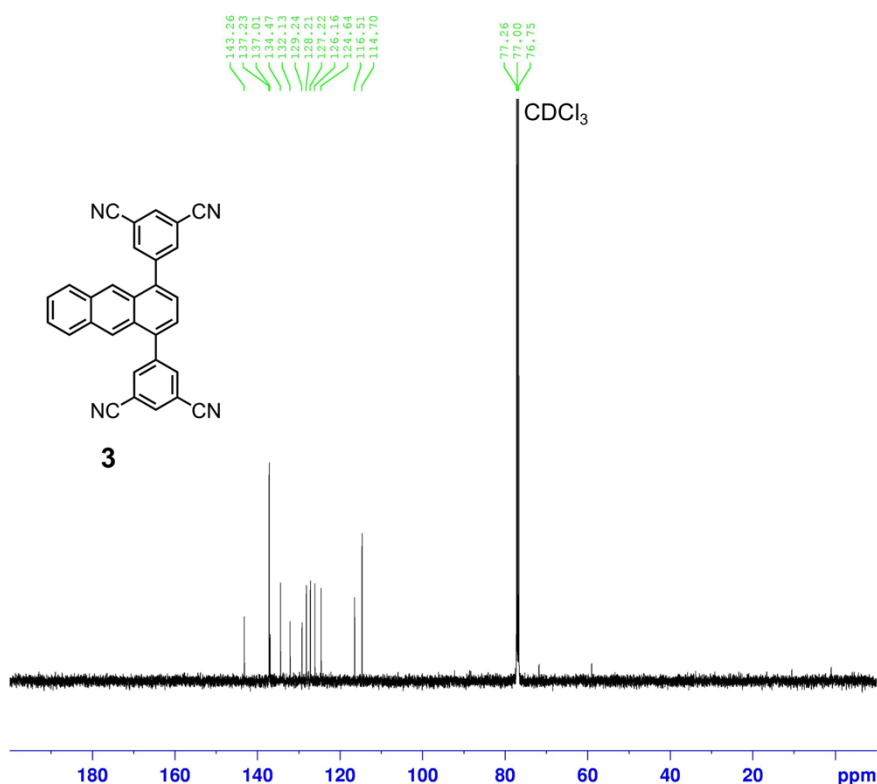

```

Current Data Parameters
NAME      kannen231123
EXPNO     2
PROCNO    1

F2 - Acquisition Parameters
Date_     20231123
Time      20.30
INSTRUM   spect
PROBHD    5 mm PABBO BB-
PULPROG   zgpg30
TD        65536
SOLVENT   CDCl3
NS         1121
DS         4
SWH        29761.904 Hz
FIDRES     0.454131 Hz
AQ         1.1010548 sec
RG         197.97
DW         16.800 usec
DE         6.50 usec
TE         298.2 K
D1         2.00000000 sec
D11        0.03000000 sec

===== CHANNEL f1 =====
NUC1       13C
P1         9.00 usec
PLW1       116.94999695 W
SFO1       125.7703637 MHz

===== CHANNEL f2 =====
CPDPRG2    waltz16
NUC2        1H
PCPD2       80.00 usec
PLW2        0.38000000 W
PLW12       0.38000000 W
PLW13       0.24320000 W
SFO2        500.1320005 MHz

F2 - Processing parameters
SI          32768
SF          125.7577909 MHz
WDW         EM
SSB         0
LB          1.00 Hz
GB          0
PC          1.40
    
```

# <sup>13</sup>C NMR spectrum (CDCl<sub>3</sub>)

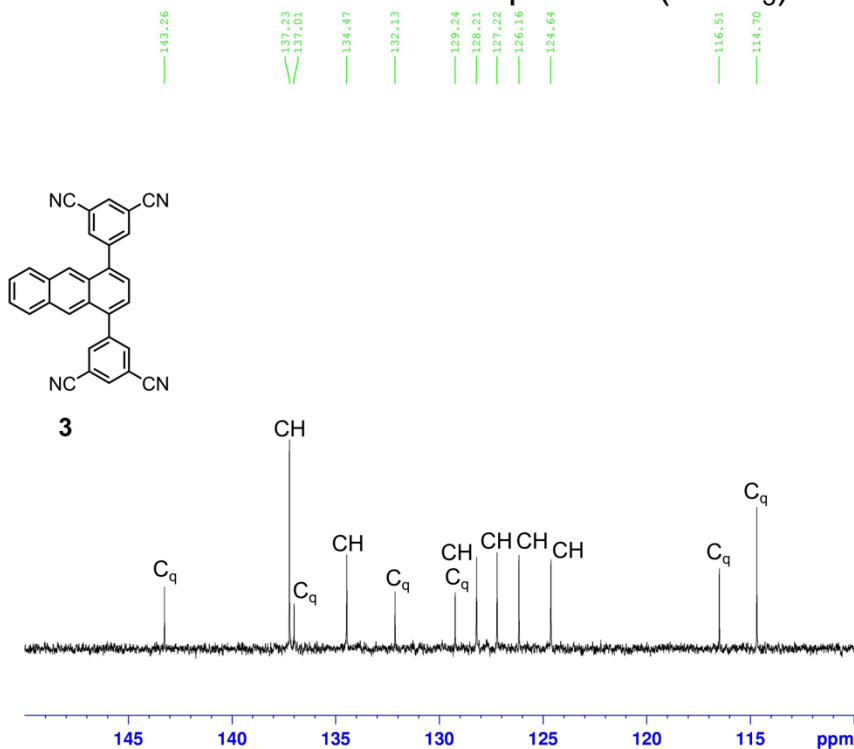

```

Current Data Parameters
NAME      kannen231123
EXPNO     2
PROCNO    1

F2 - Acquisition Parameters
Date_     20231123
Time      20.30
INSTRUM   spect
PROBHD    5 mm PABBO BB-
PULPROG   zgpg30
TD        65536
SOLVENT   CDCl3
NS         1121
DS         4
SWH        29761.904 Hz
FIDRES     0.454131 Hz
AQ         1.1010548 sec
RG         197.97
DW         16.800 usec
DE         6.50 usec
TE         298.2 K
D1         2.00000000 sec
D11        0.03000000 sec

===== CHANNEL f1 =====
NUC1       13C
P1         9.00 usec
PLW1       116.94999695 W
SFO1       125.7703637 MHz

===== CHANNEL f2 =====
CPDPRG2    waltz16
NUC2        1H
PCPD2       80.00 usec
PLW2        0.38000000 W
PLW12       0.38000000 W
PLW13       0.24320000 W
SFO2        500.1320005 MHz

F2 - Processing parameters
SI          32768
SF          125.7577909 MHz
WDW         EM
SSB         0
LB          1.00 Hz
GB          0
PC          1.40
    
```

# DEPT 135 NMR spectrum (CDCl<sub>3</sub>)

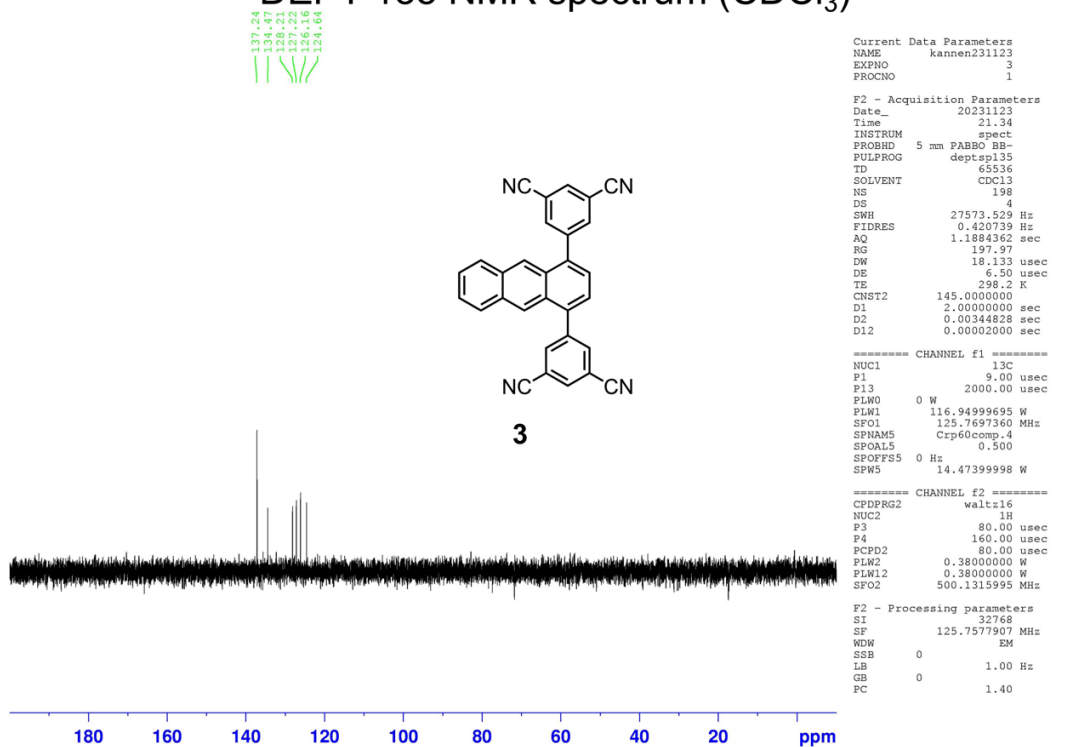

# DEPT 135 NMR spectrum (CDCl<sub>3</sub>)

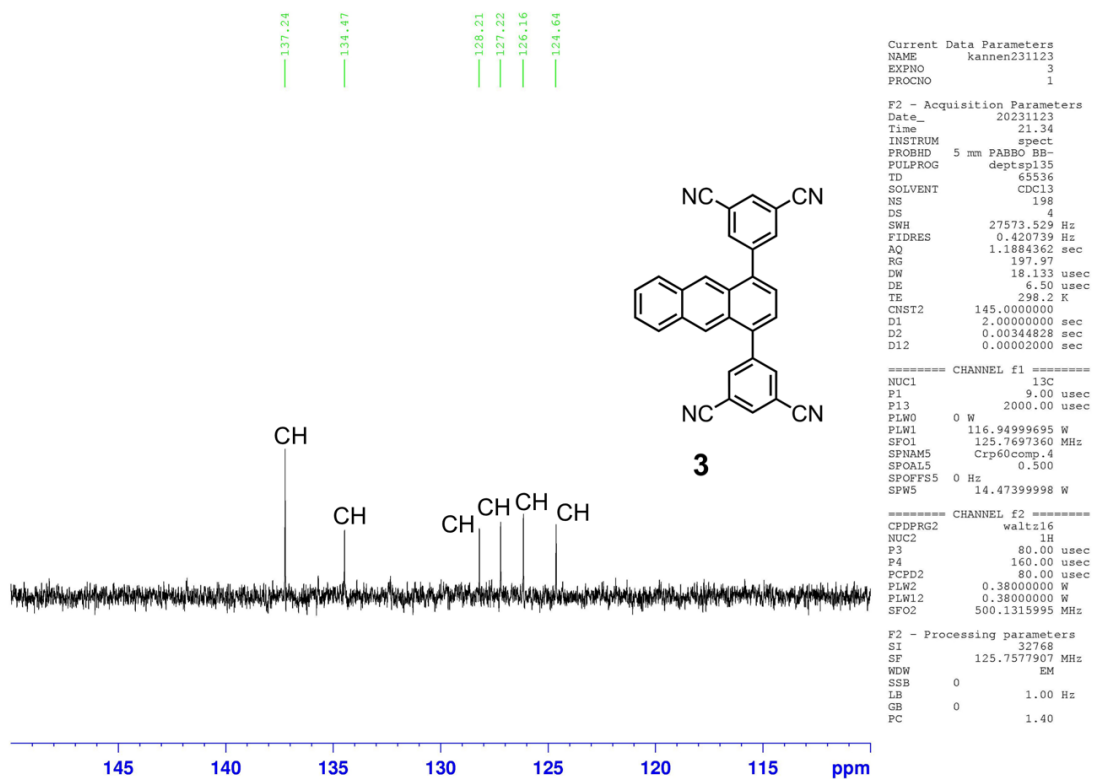

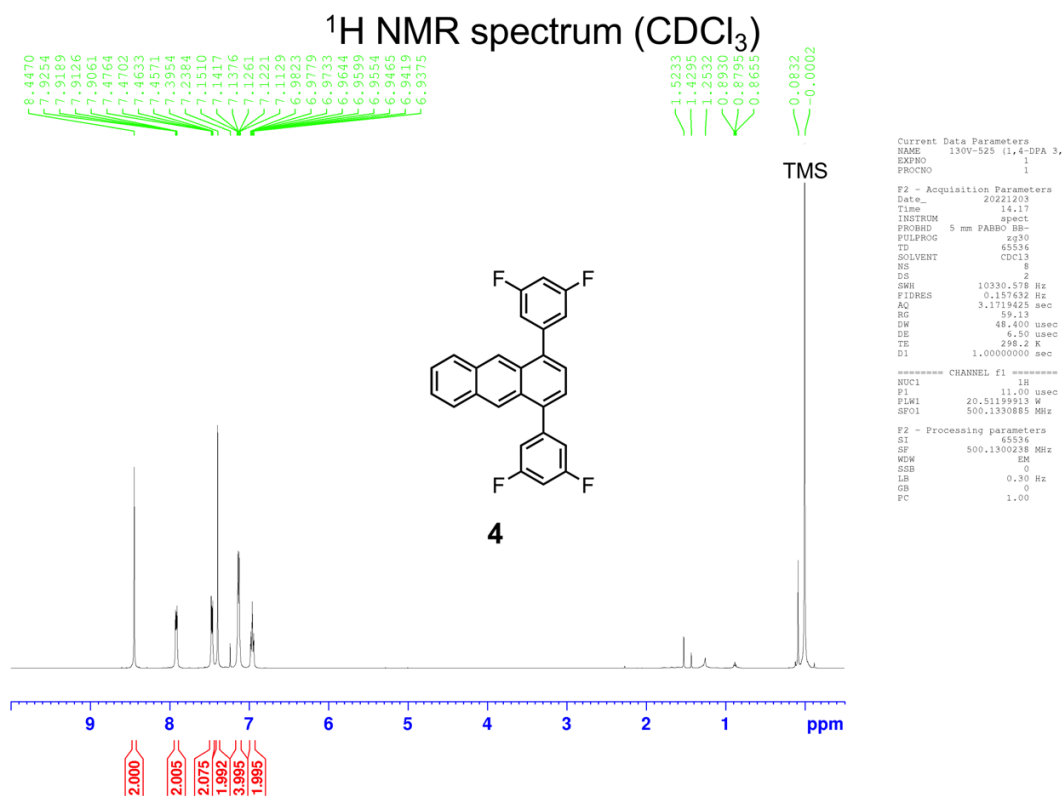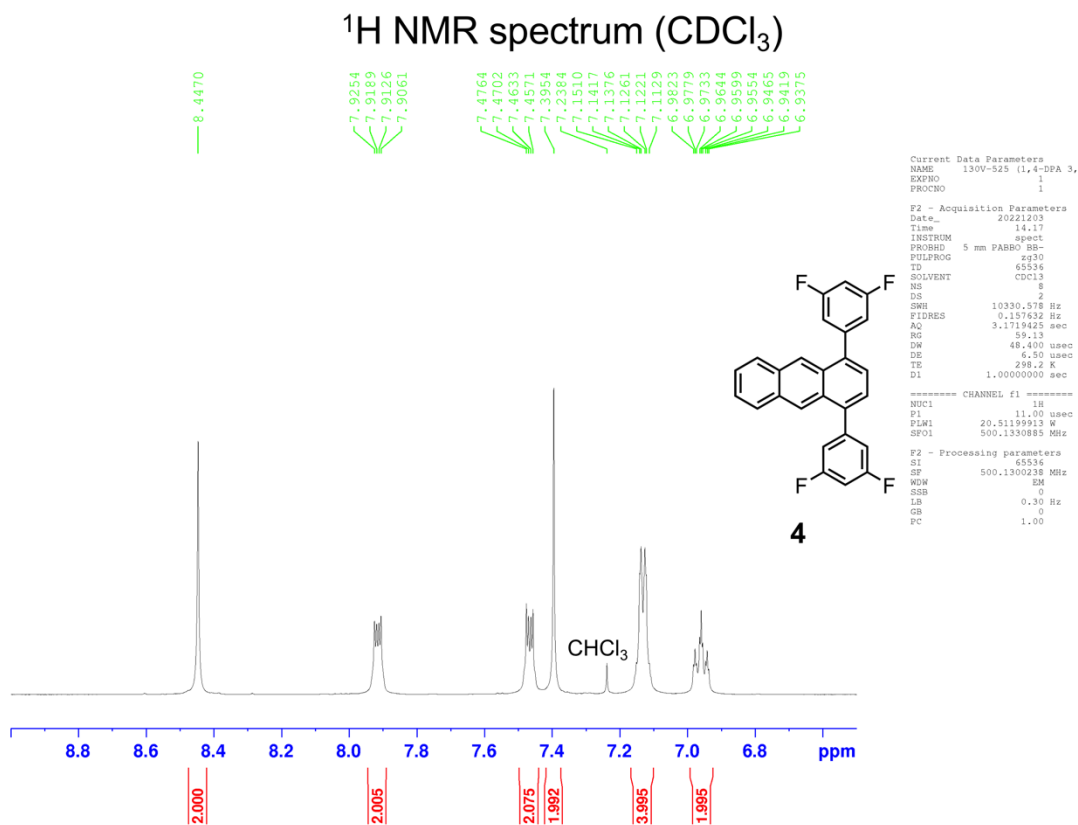

# <sup>1</sup>H NMR spectrum (CDCl<sub>3</sub>)

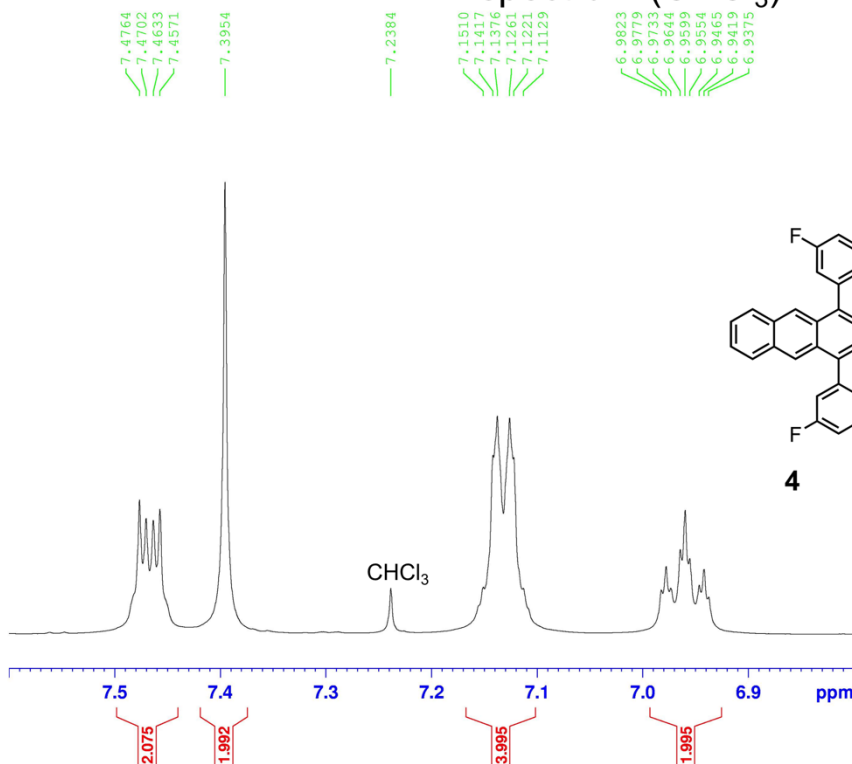

Current Data Parameters  
 NAME 130V-525  
 EXPNO 1  
 PROCNO 1

F2 - Acquisition Parameters  
 Date\_ 20221202  
 Time 21.17  
 INSTRUM spect  
 PROBHD 5 mm PABBO BB-  
 PULPROG zg30  
 TD 65536  
 SOLVENT CDCl<sub>3</sub>  
 NS 8  
 DS 2  
 SWH 10330.578 Hz  
 FIDRES 0.157632 Hz  
 AQ 3.1719923 sec  
 RG 59.13  
 DW 48.400 usec  
 DE 6.50 usec  
 TE 298.2 K  
 D1 1.00000000 sec

===== CHANNEL f1 =====  
 NUC1 1H  
 P1 11.00 usec  
 PLW1 20.51199913 W  
 SFO1 500.1330885 MHz

F2 - Processing parameters  
 SI 65536  
 SF 500.1300238 MHz  
 WDW EM  
 SSB 0  
 LB 0.30 Hz  
 GB 0  
 PC 1.00

# <sup>13</sup>C NMR spectrum (CDCl<sub>3</sub>)

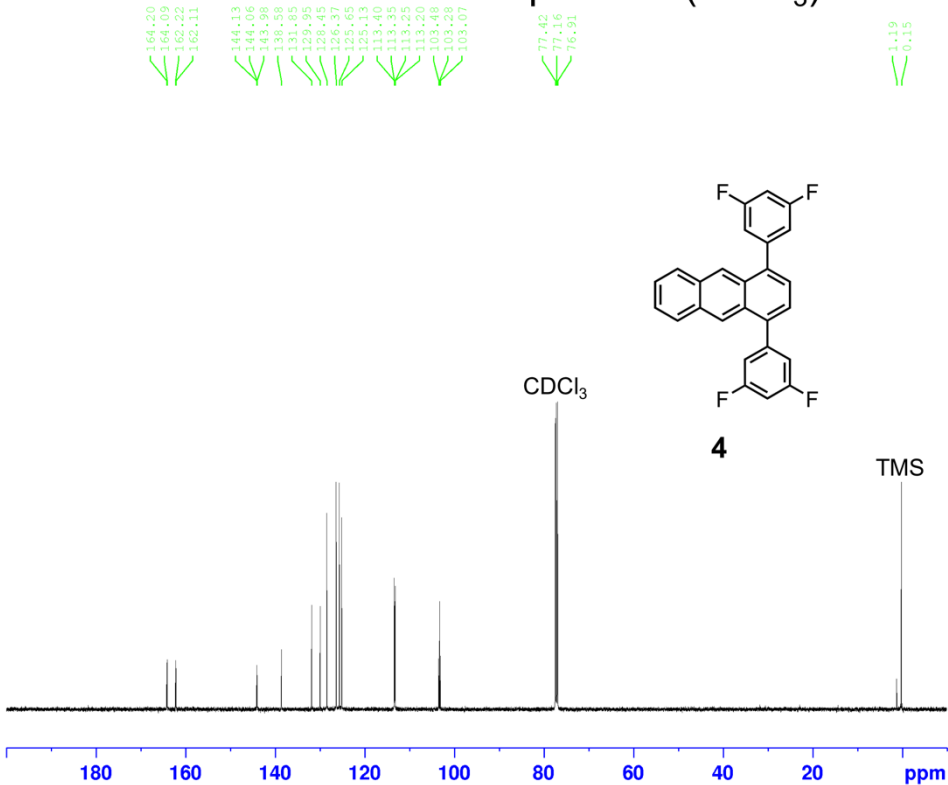

Current Data Parameters  
 NAME 130V-525 (1,4-DFA 3,  
 EXPNO 2  
 PROCNO 1

F2 - Acquisition Parameters  
 Date\_ 20221203  
 Time 14.20  
 INSTRUM spect  
 PROBHD 5 mm PABBO BB-  
 PULPROG zgpg30  
 TD 65536  
 SOLVENT CDCl<sub>3</sub>  
 NS 416  
 DS 4  
 SWH 29761.904 Hz  
 FIDRES 0.454131 Hz  
 AQ 1.1010048 sec  
 RG 197.57  
 DW 16.800 usec  
 DE 6.50 usec  
 TE 298.6 K  
 D1 2.00000000 sec  
 D11 0.03000000 sec

===== CHANNEL f1 =====  
 NUC1 13C  
 P1 9.00 usec  
 PLW1 116.94999695 W  
 SFO1 125.7703637 MHz

===== CHANNEL f2 =====  
 CPDPRG2 waltz16  
 NUC2 1H  
 PCPD2 80.00 usec  
 PLW2 0.38000000 W  
 PLW12 0.38000000 W  
 PLW13 0.24320000 W  
 SFO2 500.1320005 MHz

F2 - Processing parameters  
 SI 32768  
 SF 125.7577715 MHz  
 WDW EM  
 SSB 0  
 LB 1.00 Hz  
 GB 0  
 PC 1.40

# <sup>13</sup>C NMR spectrum (CDCl<sub>3</sub>)

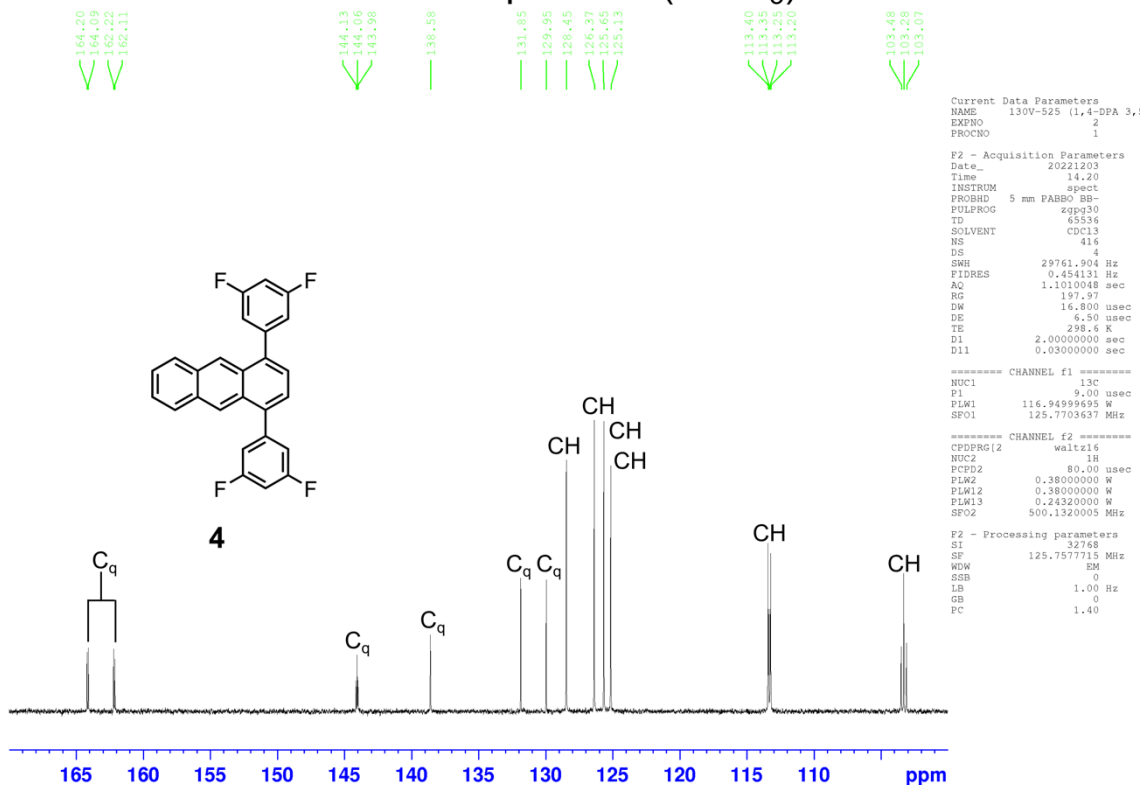

# <sup>13</sup>C NMR spectrum (CDCl<sub>3</sub>)

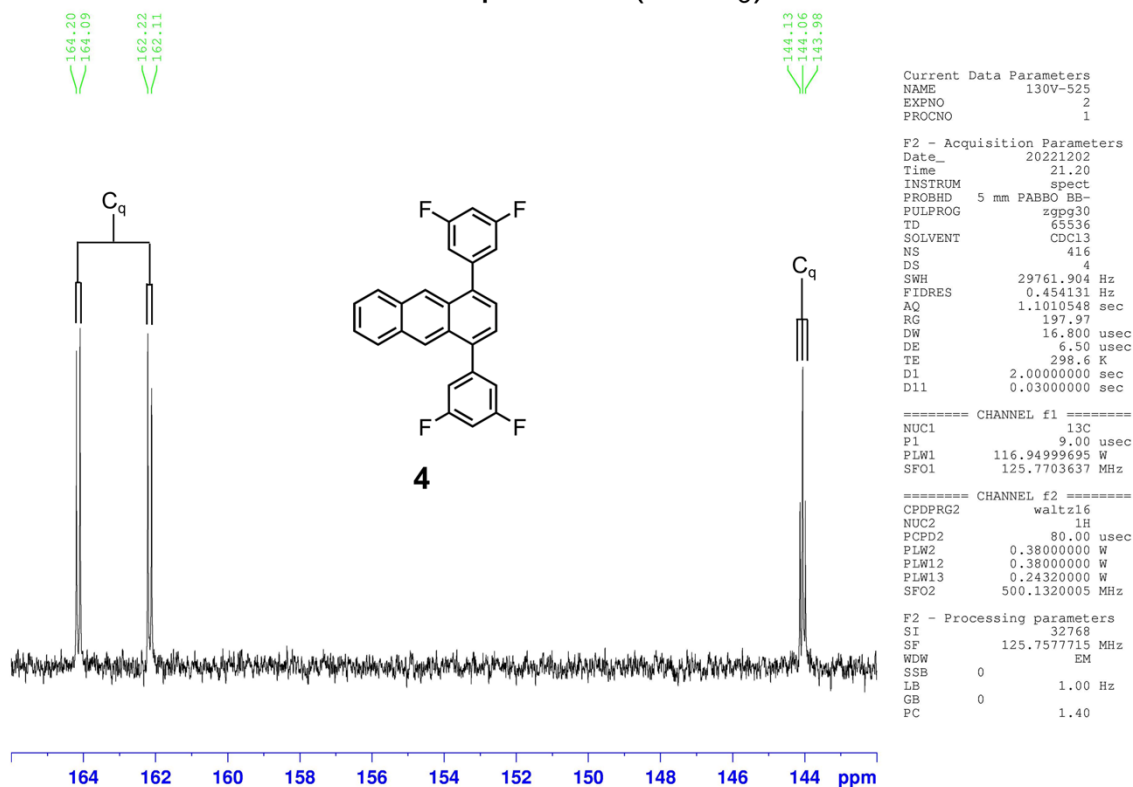



# <sup>13</sup>C NMR spectrum (CDCl<sub>3</sub>)

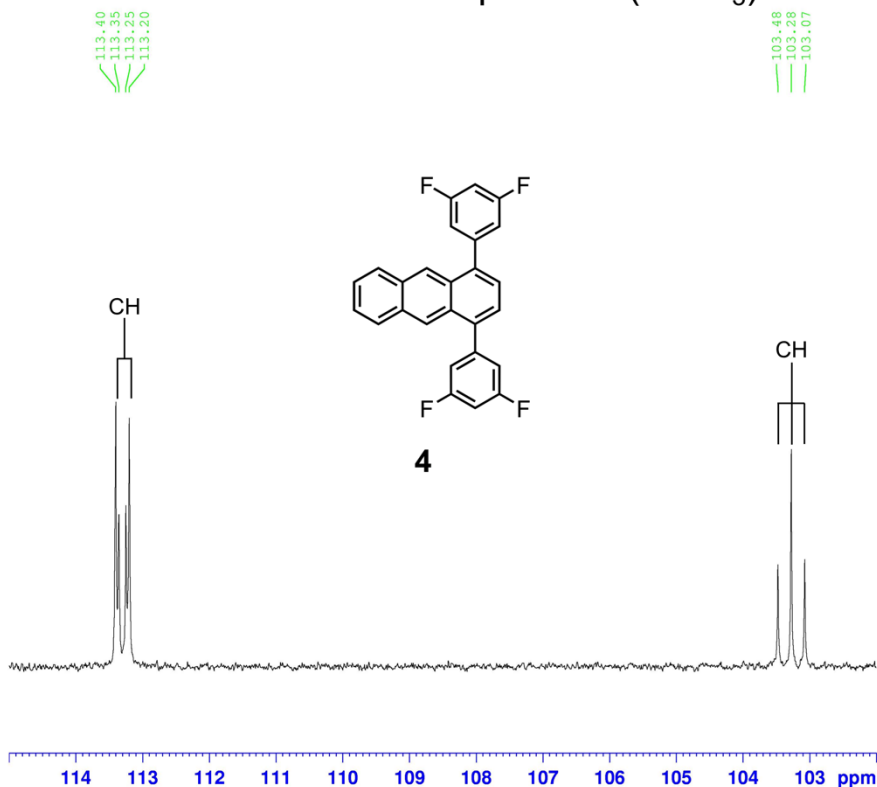

Current Data Parameters  
NAME 130V-525  
EXPNO 2  
PROCNO 1

F2 - Acquisition Parameters  
Date\_ 20221202  
Time 21.20  
INSTRUM spect  
PROBHD 5 mm PABBO BB-  
PULPROG zgpg30  
TD 65536  
SOLVENT CDCl3  
NS 416  
DS 4  
SWH 29761.904 Hz  
FIDRES 0.454131 Hz  
AQ 1.1010548 sec  
RG 197.97  
DW 16.800 usec  
DE 6.50 usec  
TE 298.6 K  
D1 2.00000000 sec  
D11 0.03000000 sec

===== CHANNEL f1 =====  
NUC1 13C  
P1 9.00 usec  
PLW1 116.94999695 W  
SFO1 125.7703637 MHz

===== CHANNEL f2 =====  
CPDPRG2 waltz16  
NUC2 1H  
PCPD2 80.00 usec  
PLW2 0.38000000 W  
PLW12 0.38000000 W  
PLW13 0.24320000 W  
SFO2 500.1320005 MHz

F2 - Processing parameters  
SI 32768  
SF 125.7577715 MHz  
WDW EM  
SSB 0  
LB 1.00 Hz  
GB 0  
PC 1.40

# DEPT 135 NMR spectrum (CDCl<sub>3</sub>)

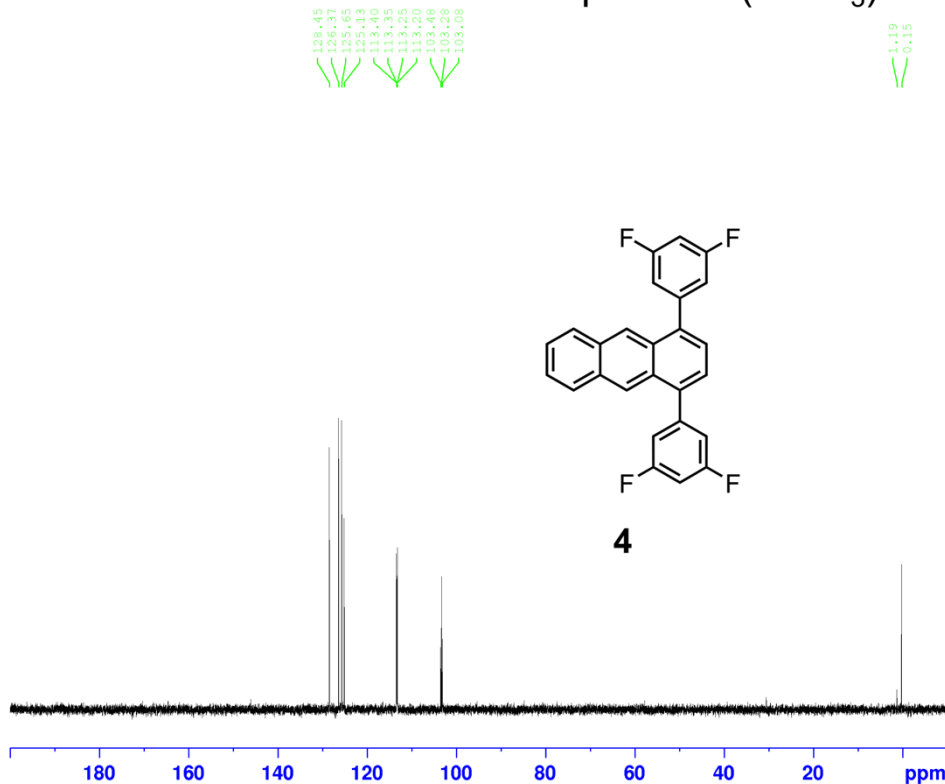

Current Data Parameters  
NAME 130V-525 (1,4-DFA 3,1  
EXPNO 3  
PROCNO 1

F2 - Acquisition Parameters  
Date\_ 20221203  
Time 14.43  
INSTRUM spect  
PROBHD 5 mm PABBO BB-  
PULPROG deptsp135  
TD 65536  
SOLVENT CDCl3  
NS 127  
DS 4  
SWH 27573.529 Hz  
FIDRES 0.420739 Hz  
AQ 1.1583861 sec  
RG 197.97  
DW 18.133 usec  
DE 6.50 usec  
TE 298.6 K  
CNST2 145.0000000  
D1 2.00000000 sec  
D2 0.00344828 sec  
D12 0.00002000 sec

===== CHANNEL f1 =====  
NUC1 13C  
P1 9.00 usec  
PL1 2000.00 usec  
PLW0 0 W  
PLW1 116.94999695 W  
SFO1 125.7697360 MHz  
SPNAM(5) Crp60comp.4  
SFOAL5 0.500  
SFOFF55 0 Hz  
SPW5 14.47399998 W

===== CHANNEL f2 =====  
CPDPRG2 waltz16  
NUC2 1H  
P3 80.00 usec  
P4 160.00 usec  
PCPD2 80.00 usec  
PLW2 0.38000000 W  
PLW12 0.38000000 W  
SFO2 500.1315995 MHz

F2 - Processing parameters  
SI 32768  
SF 125.7577715 MHz  
WDW EM  
SSB 0  
LB 1.00 Hz  
GB 0  
PC 1.40

# DEPT 135 NMR spectrum (CDCl<sub>3</sub>)

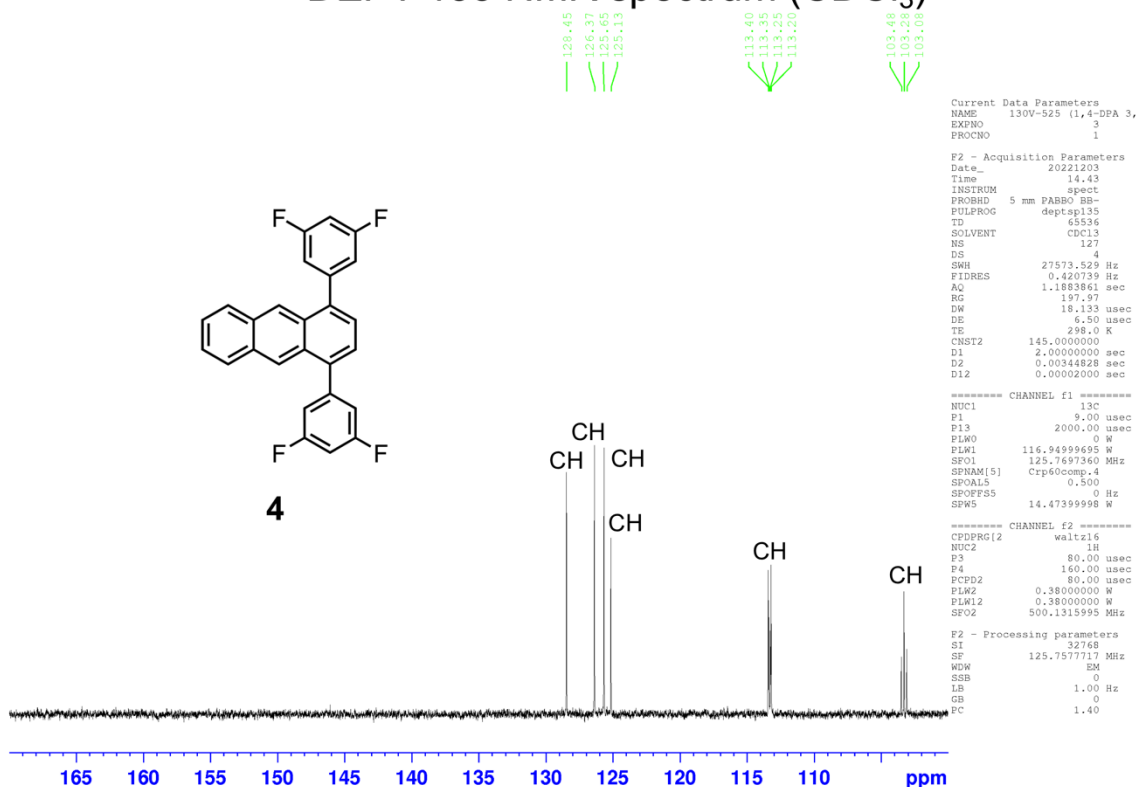

# <sup>19</sup>F NMR spectrum (CDCl<sub>3</sub>)

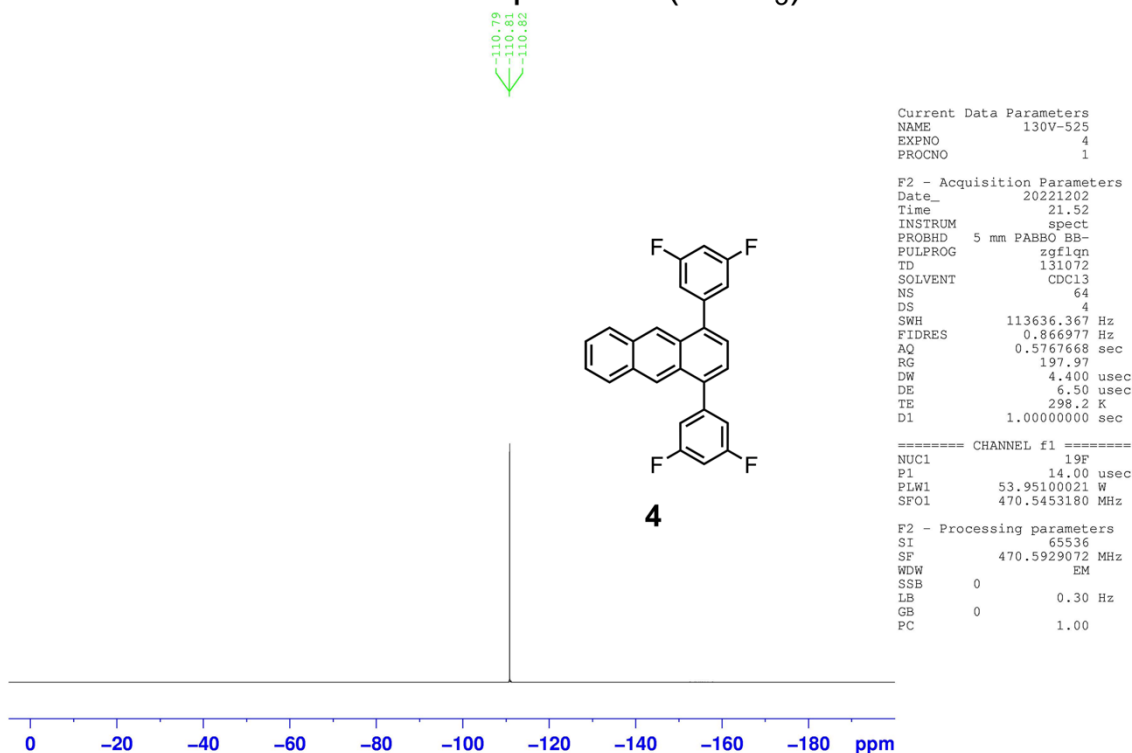

Supplement: s1 [file s1]
